# Supplementary material
Source: bioRxiv or medRxiv preprint supplement (https://www.medrxiv.org/highwire/filestream/85935/field_highwire_adjunct_files/1/2020.06.11.20128918-2.pdf)

# Alabama

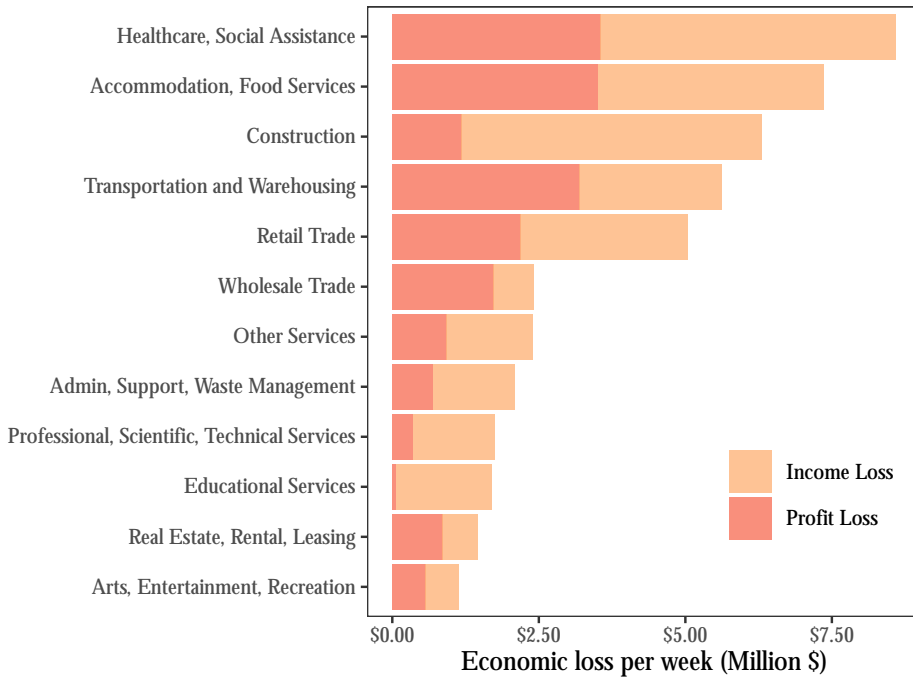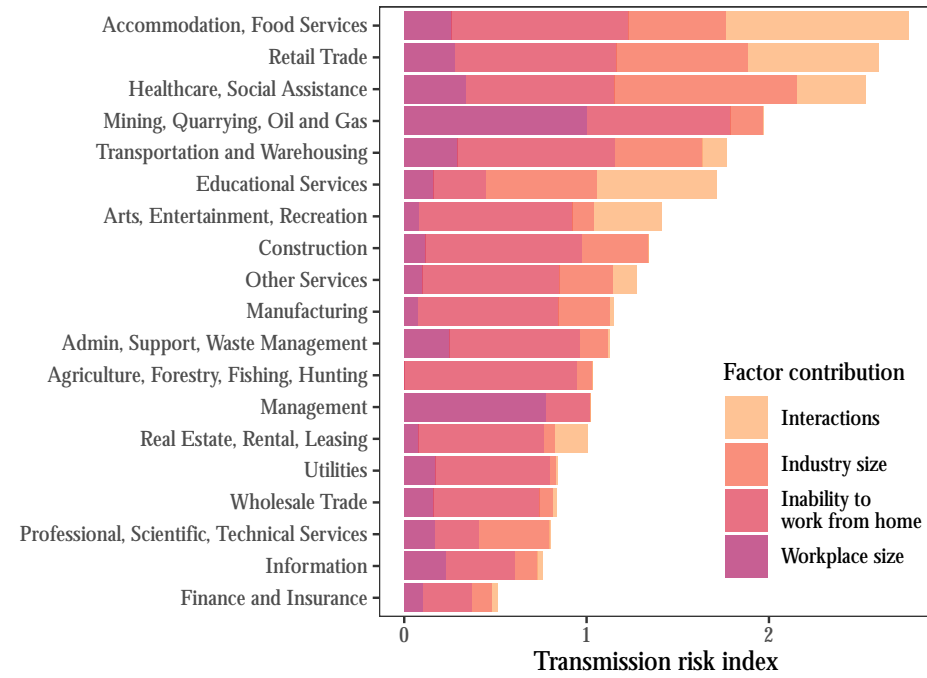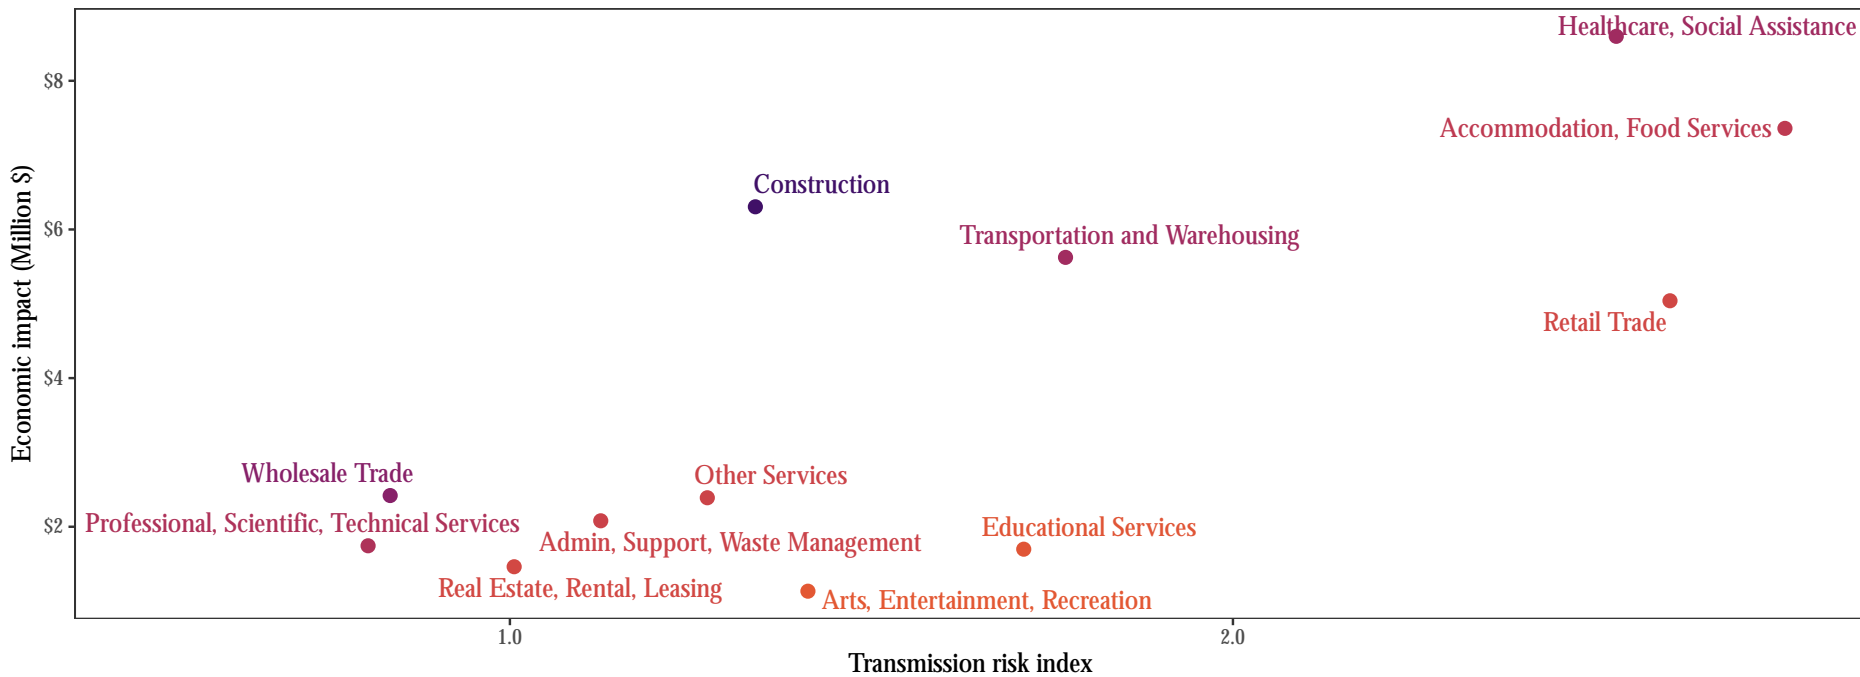

# Alaska

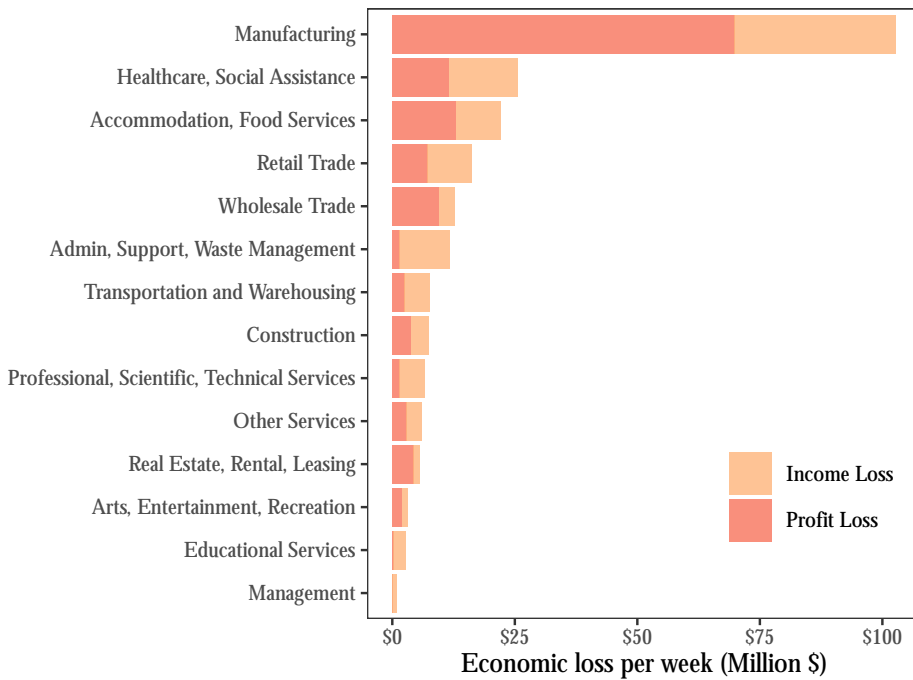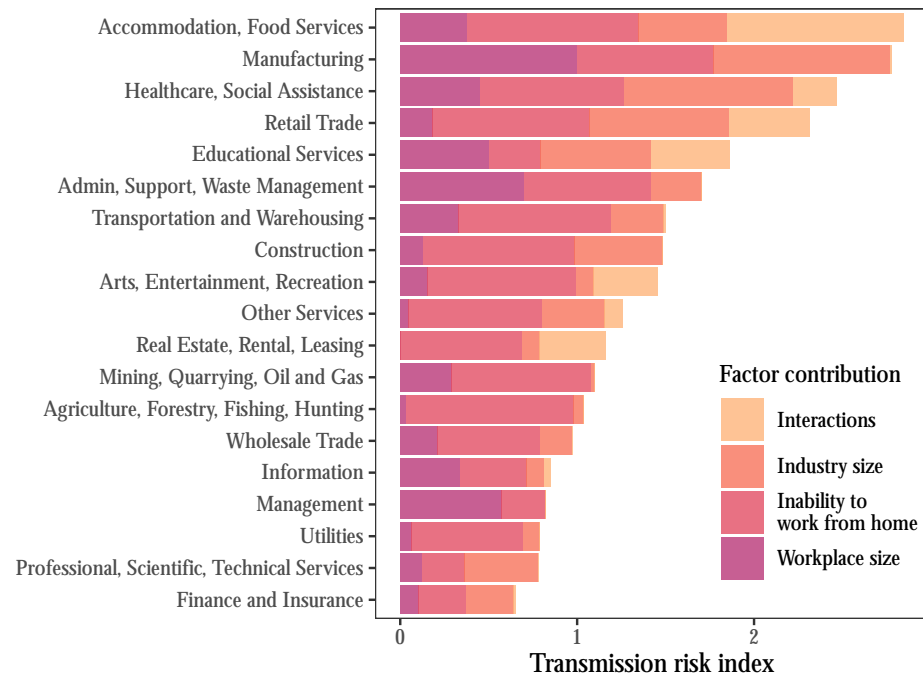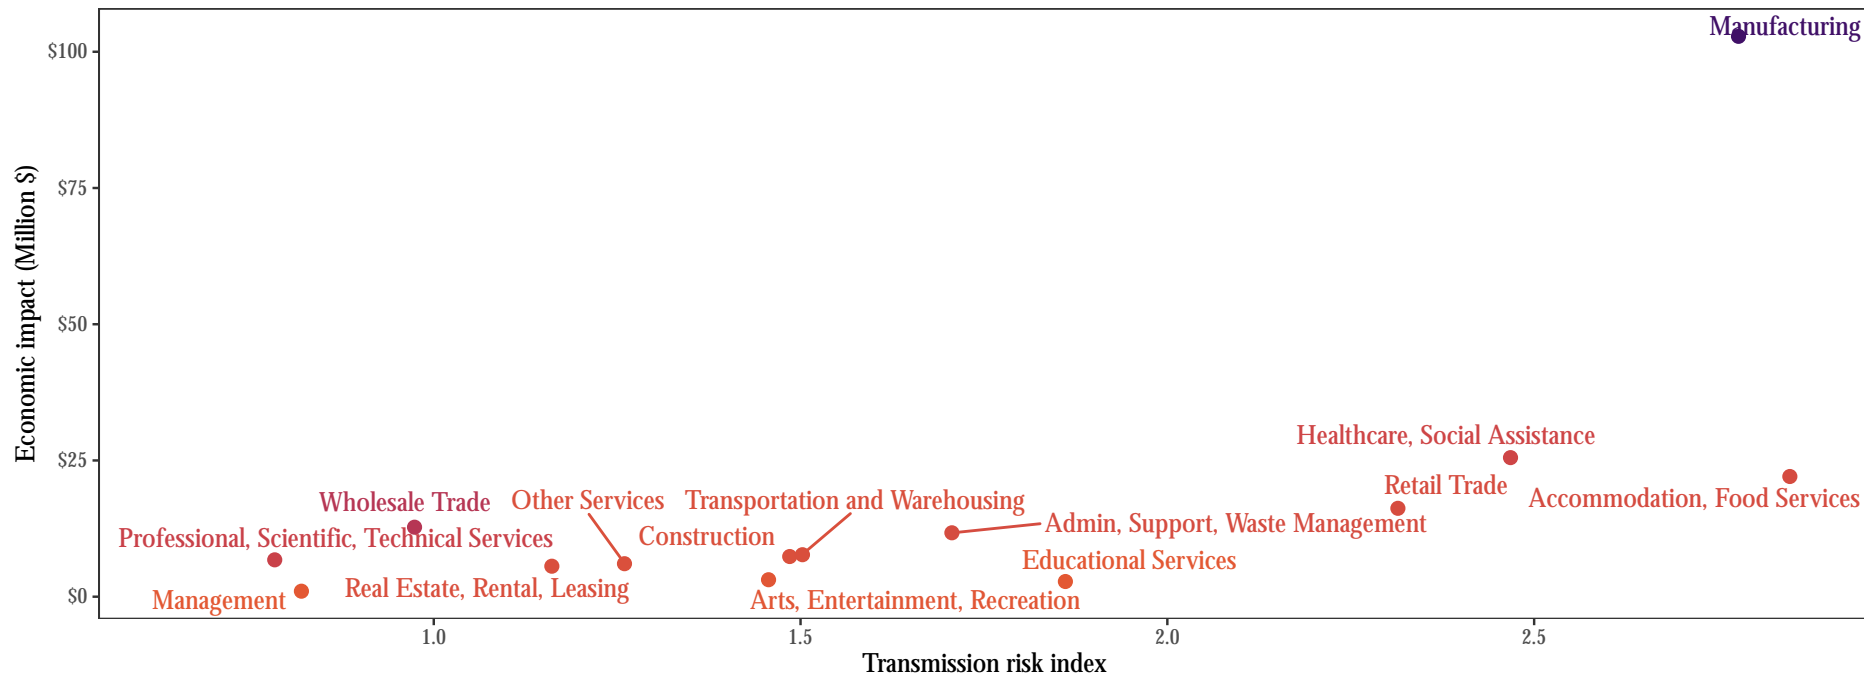

# Arizona

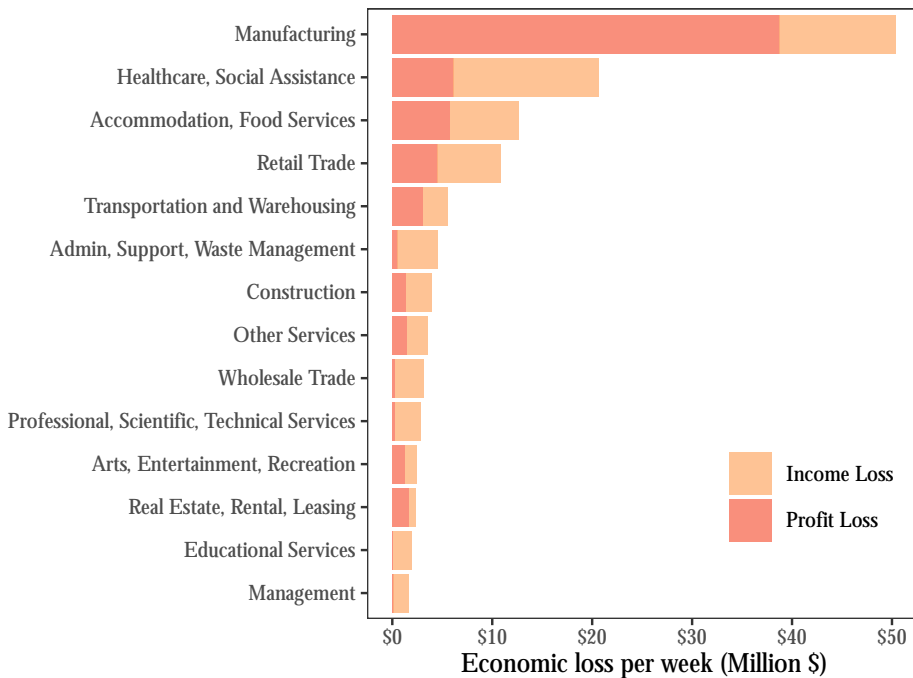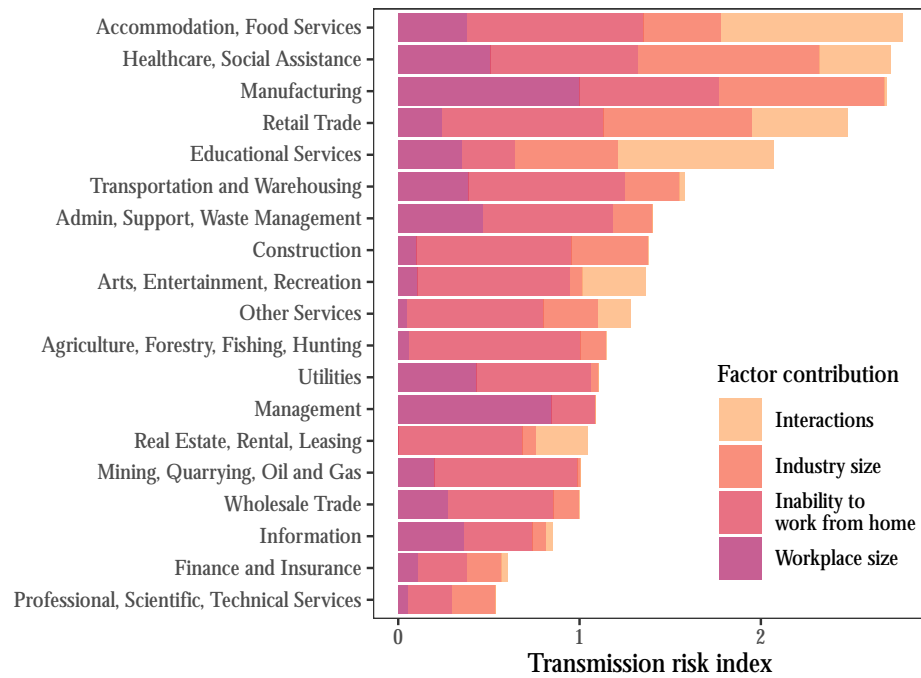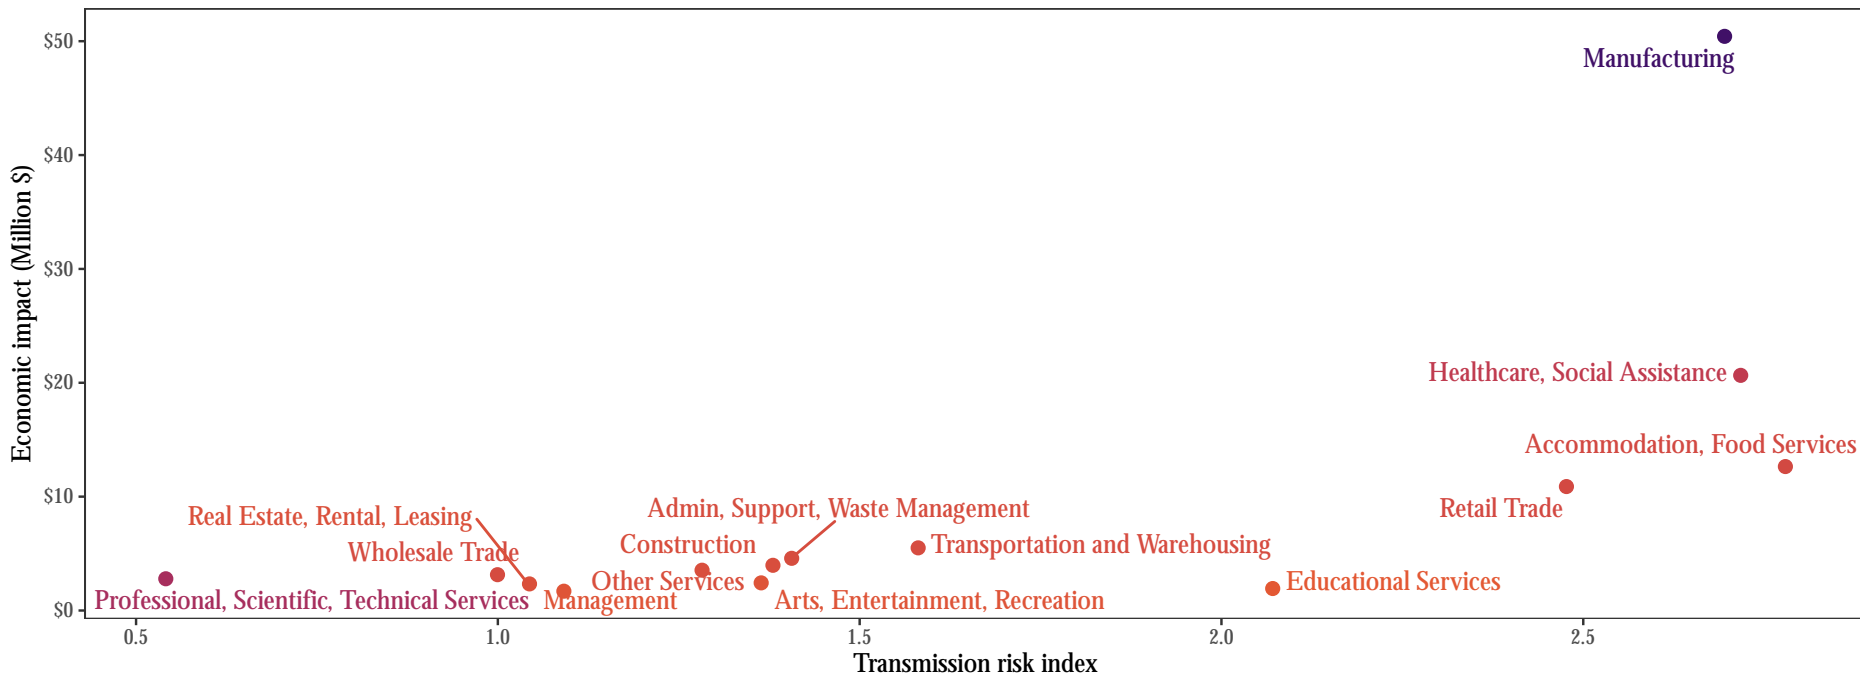

# Arkansas

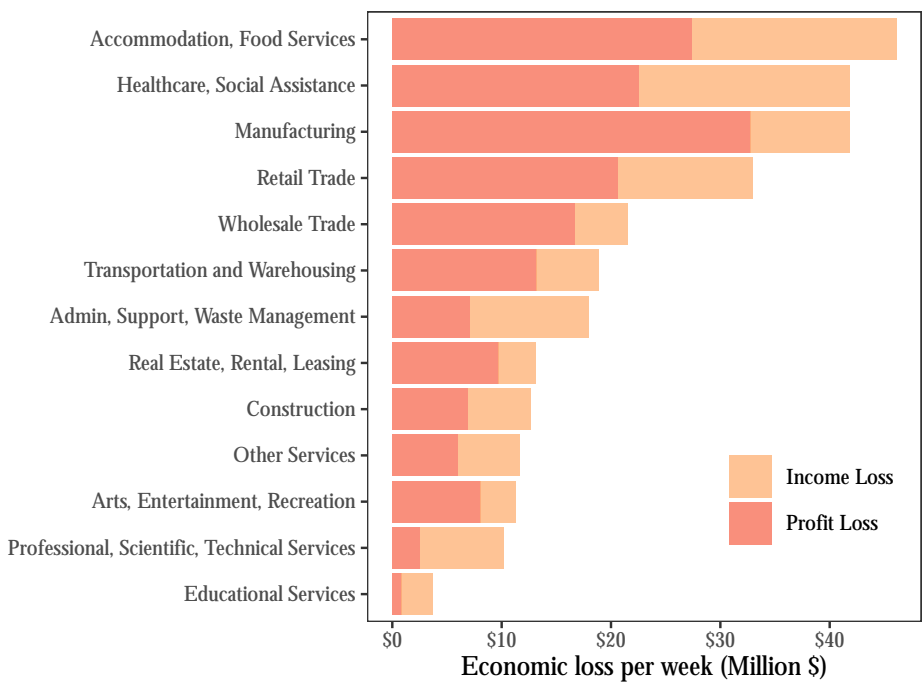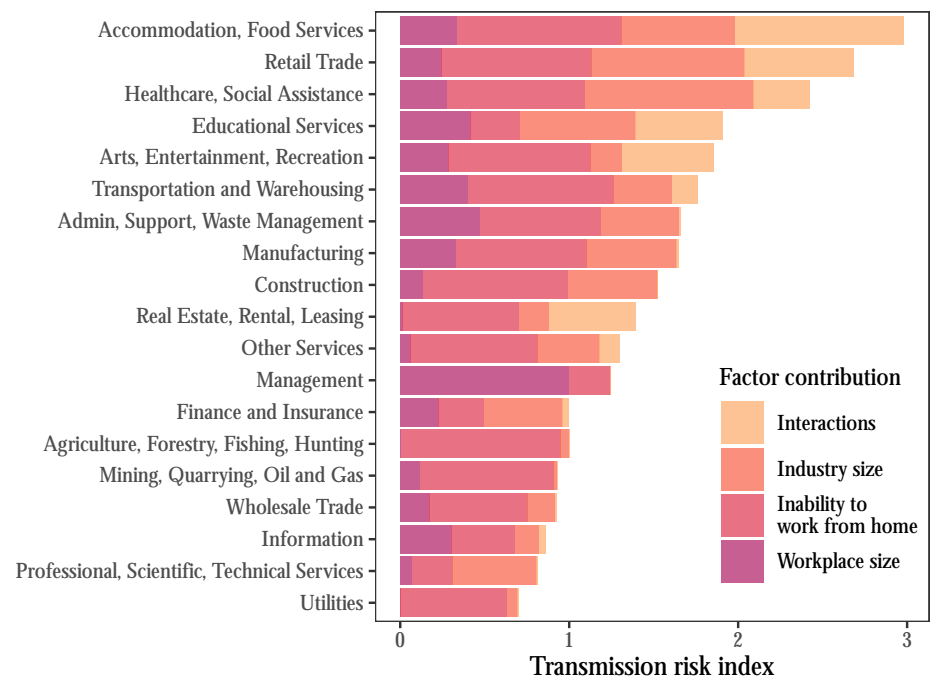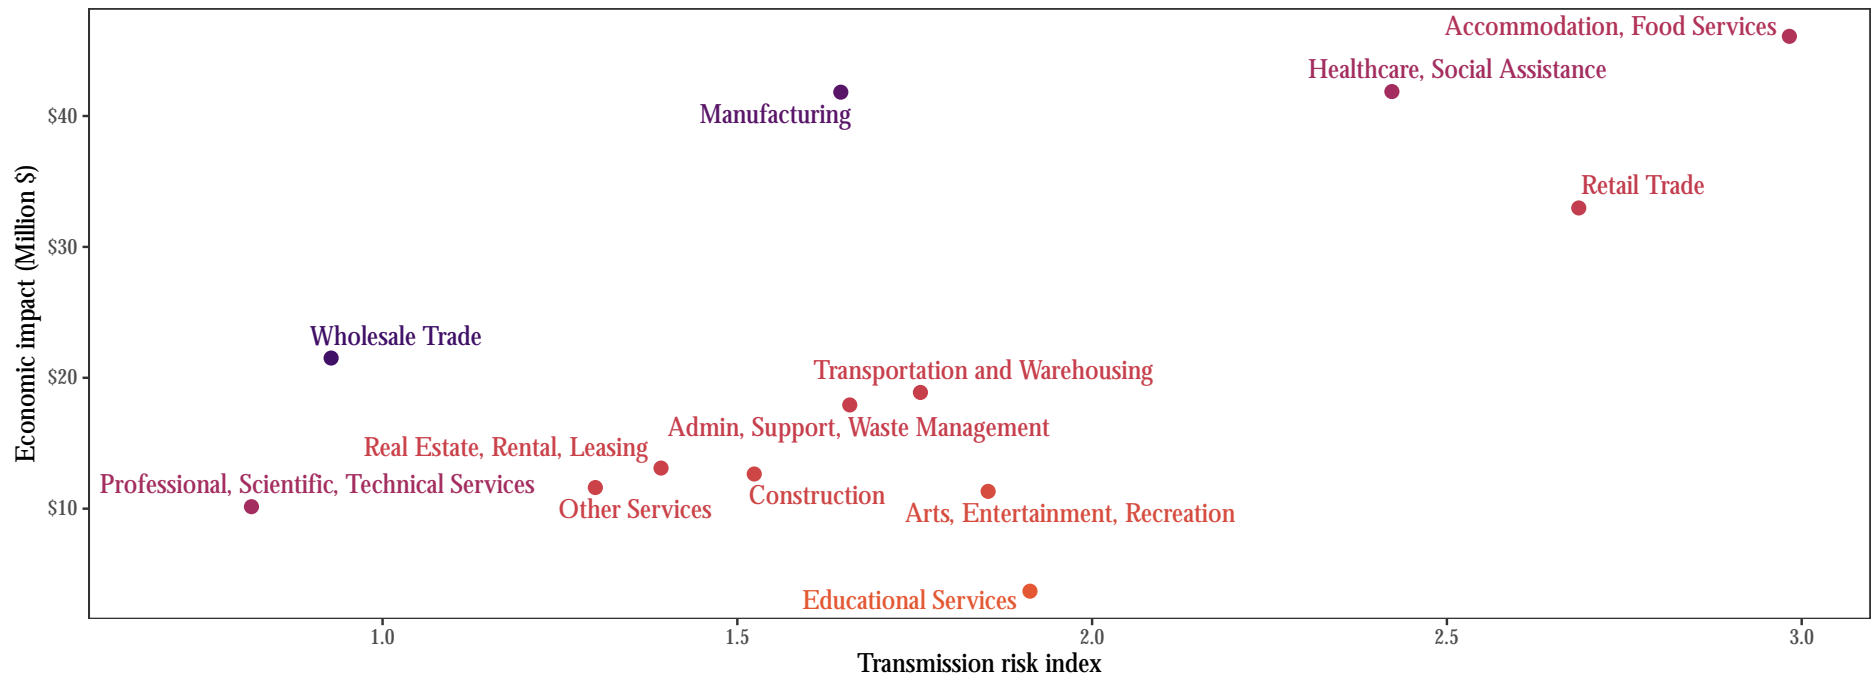

# California

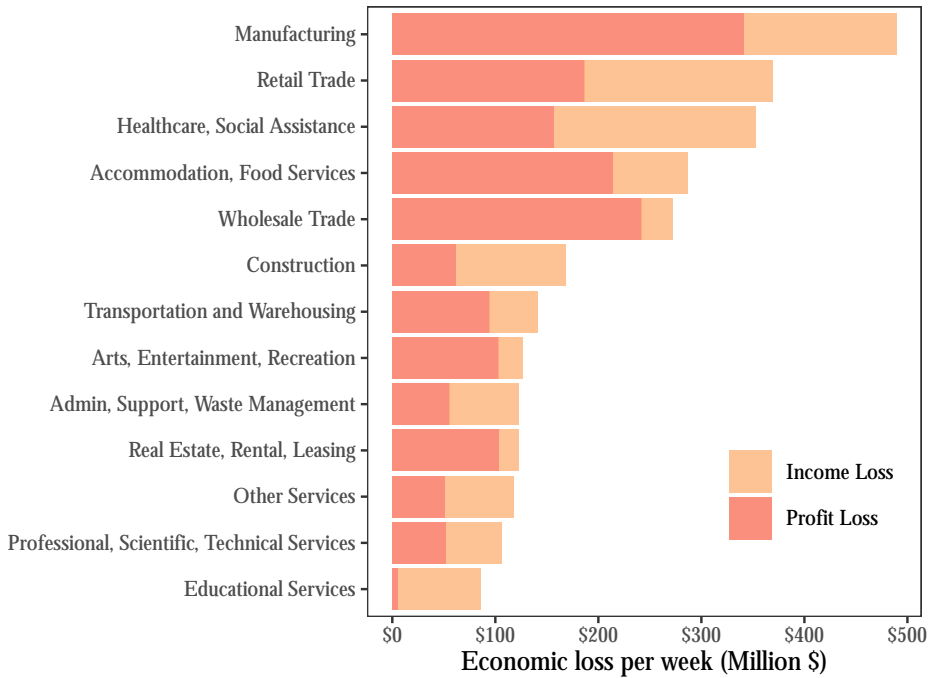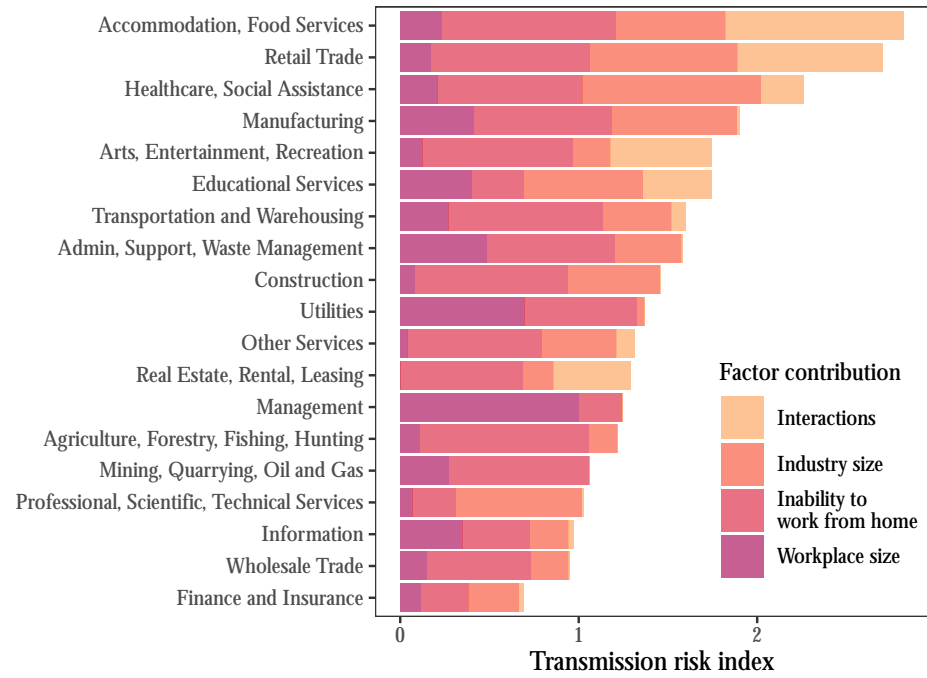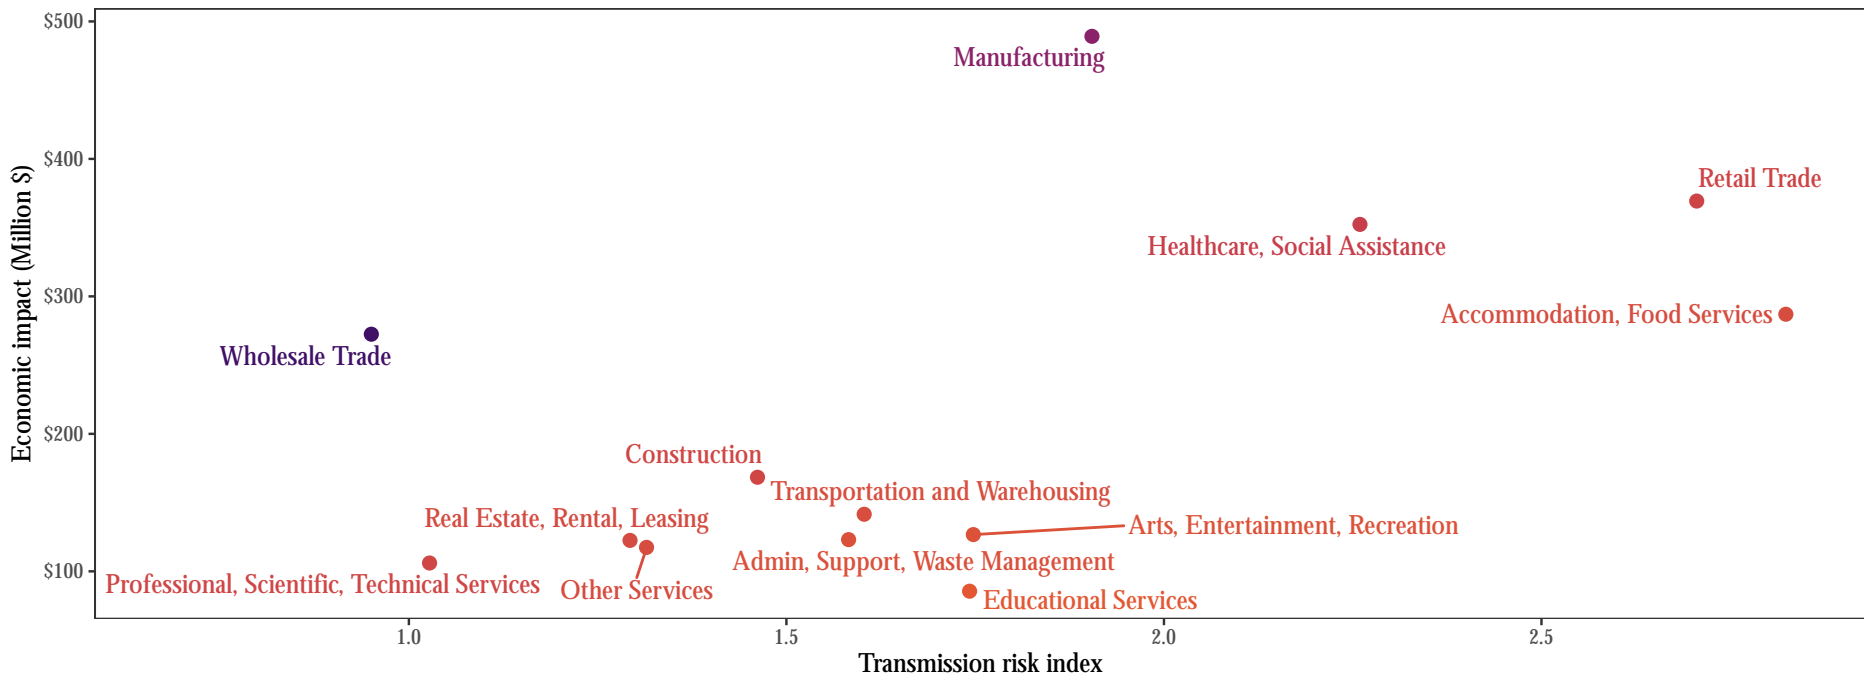

# Colorado

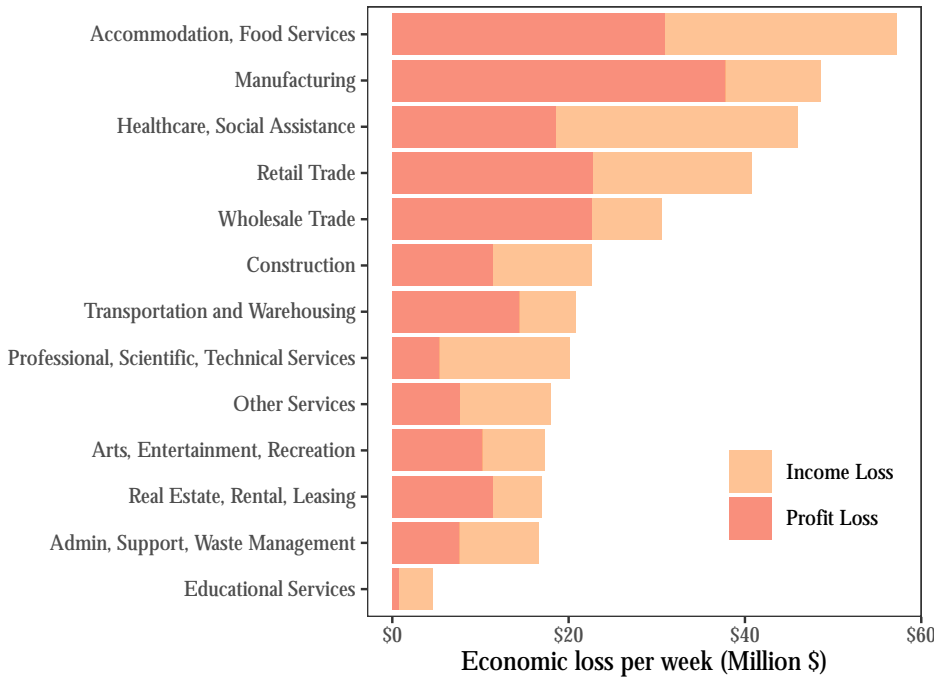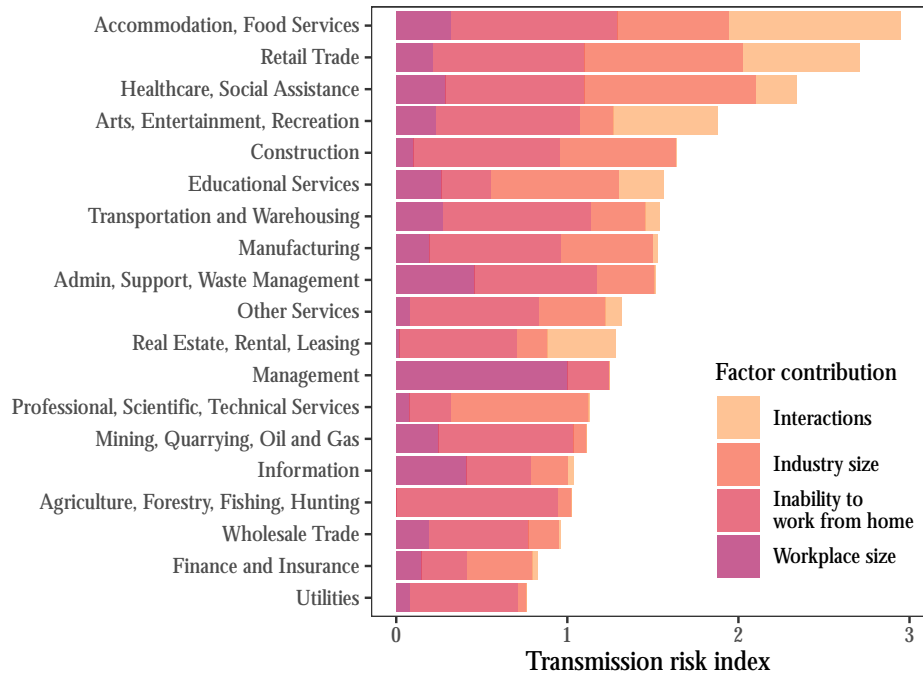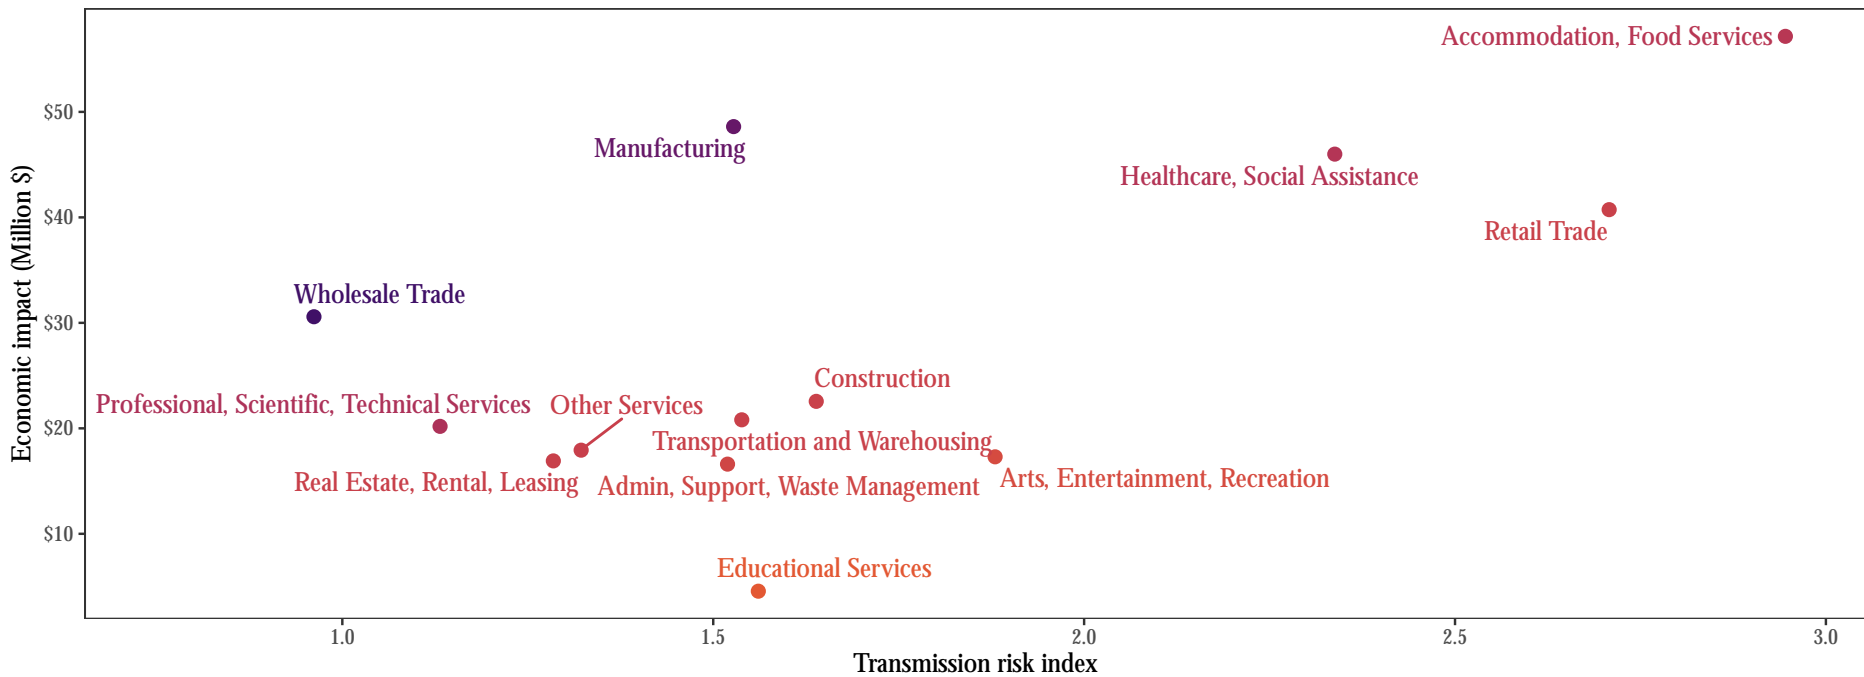

# Connecticut

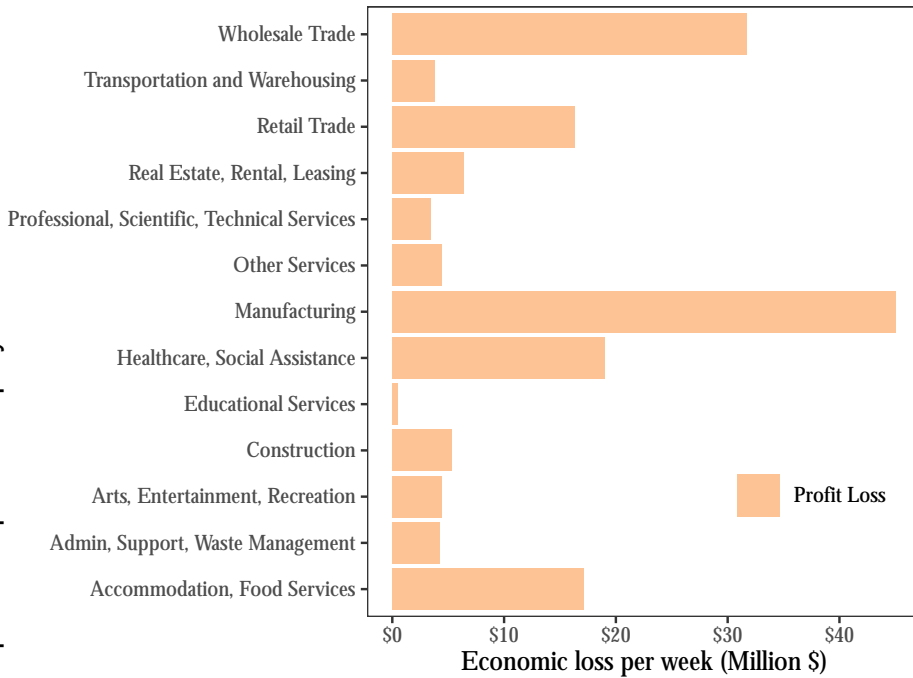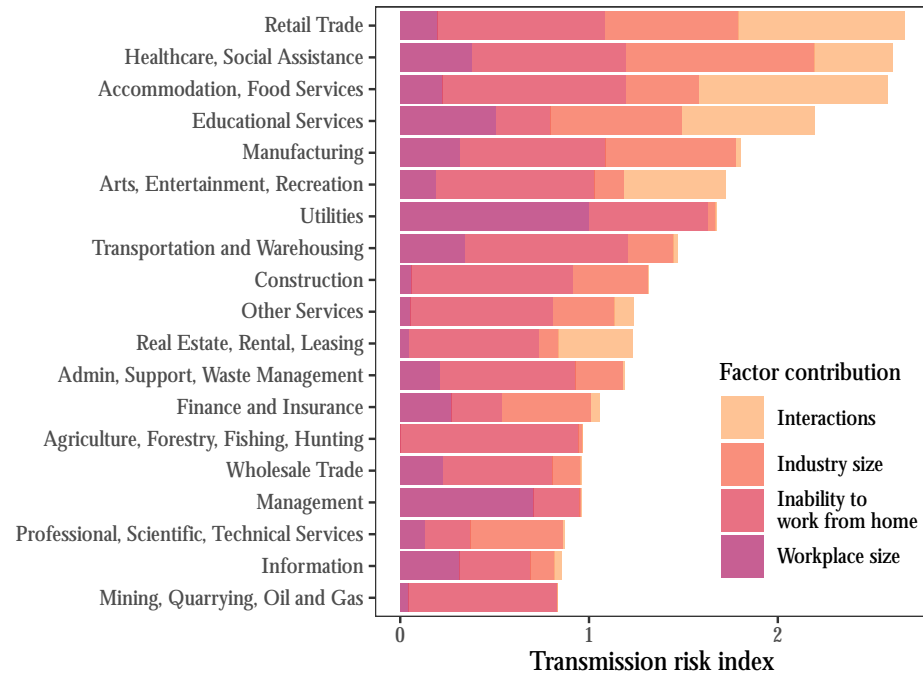

As of 6/4/2020, CT has not reported April unemployment

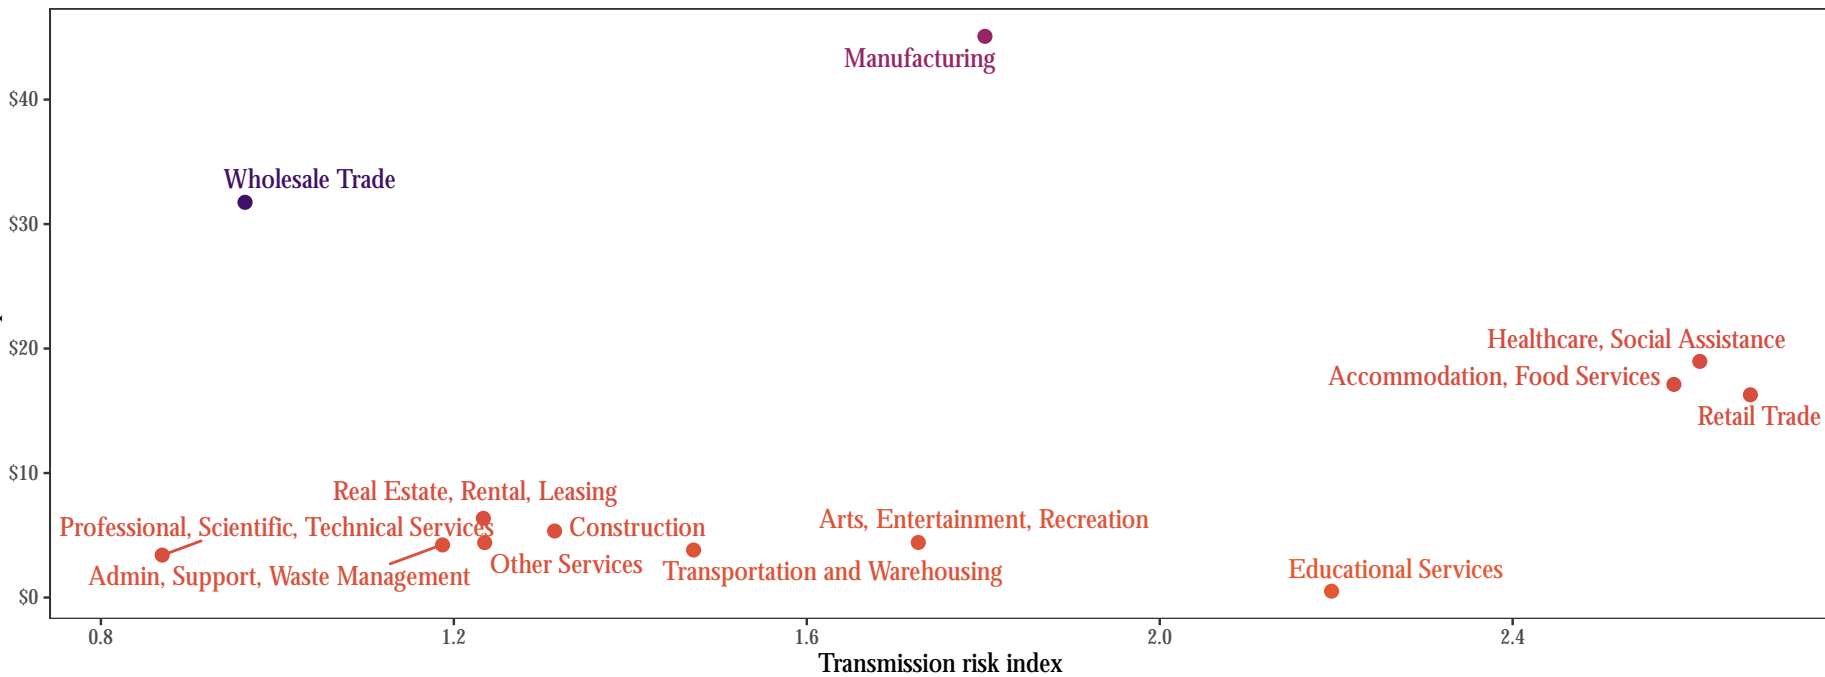

# Delaware

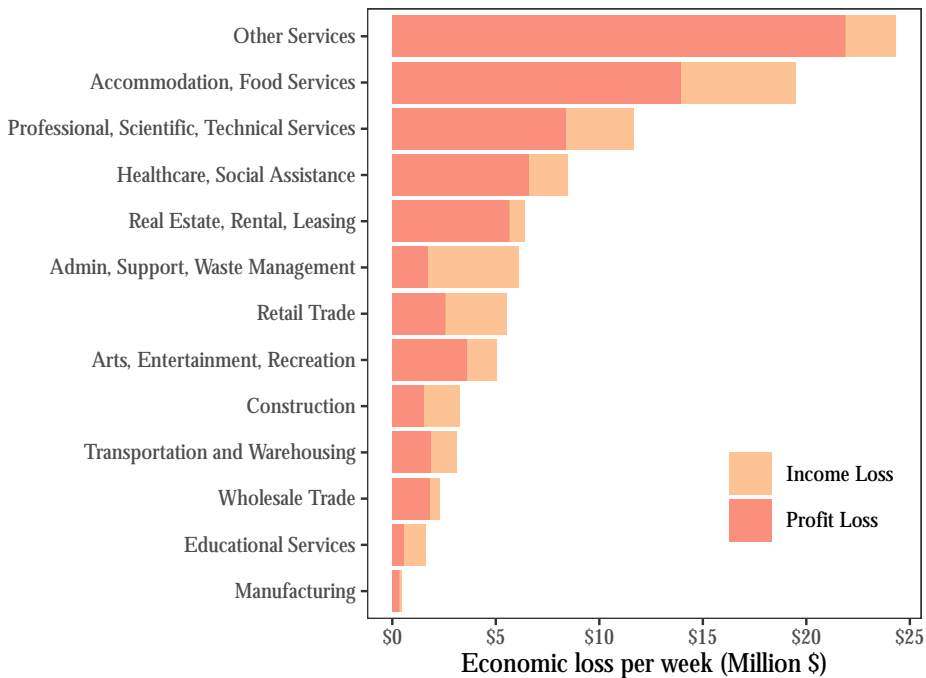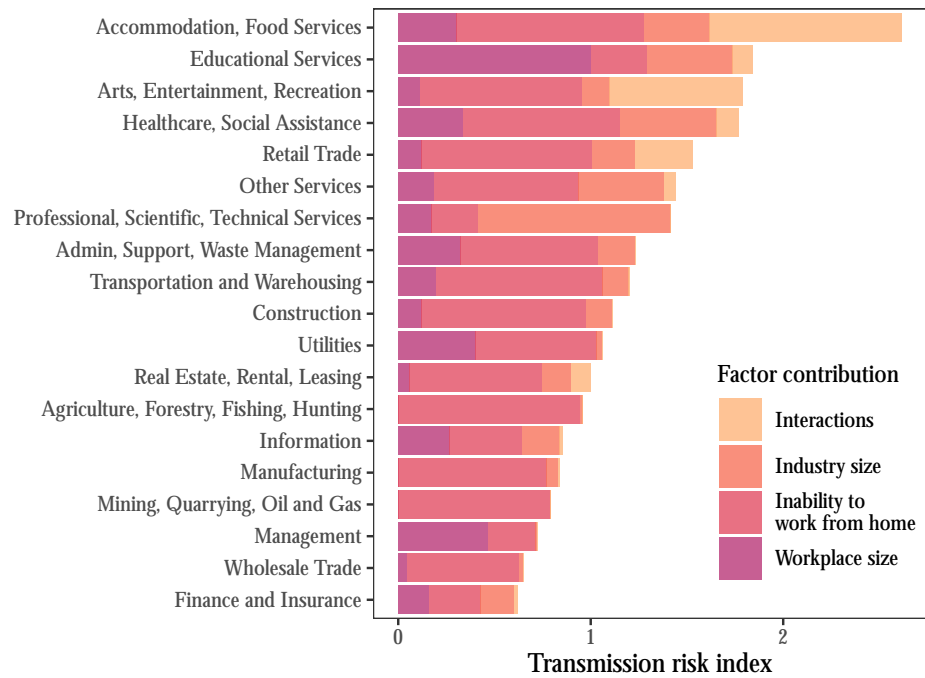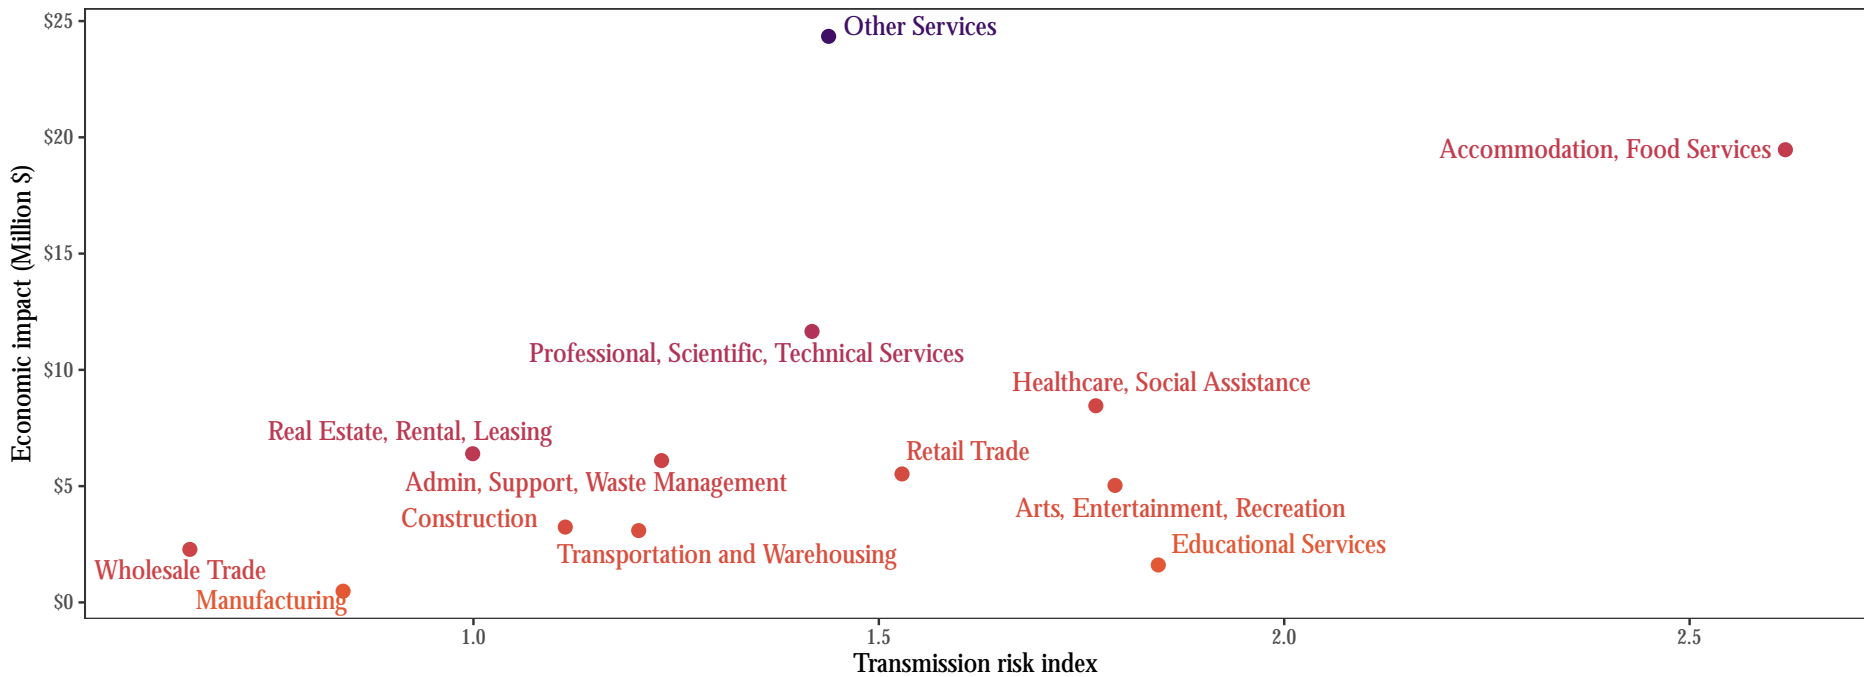



# District of Columbia

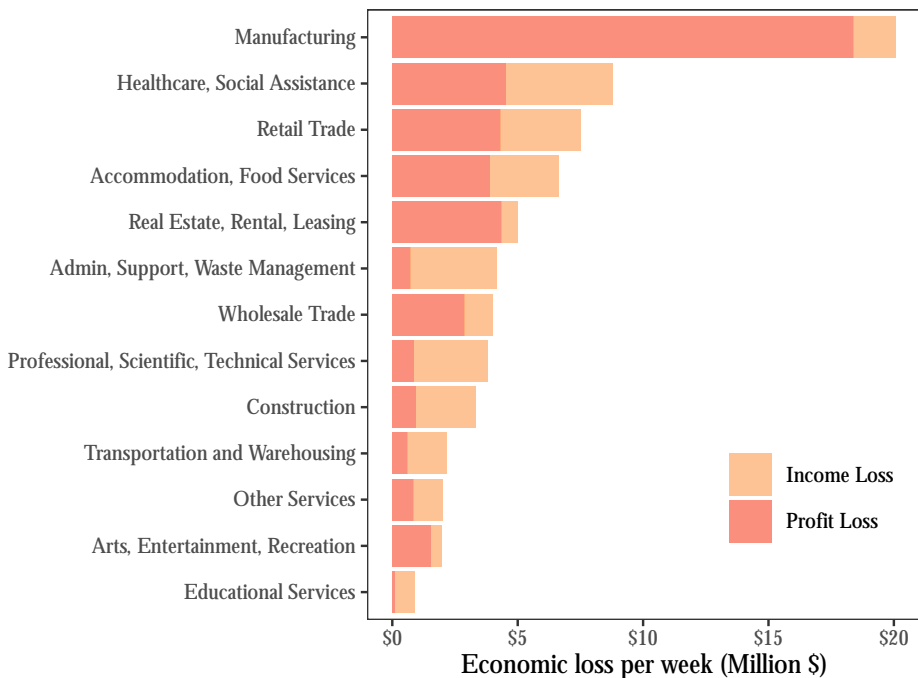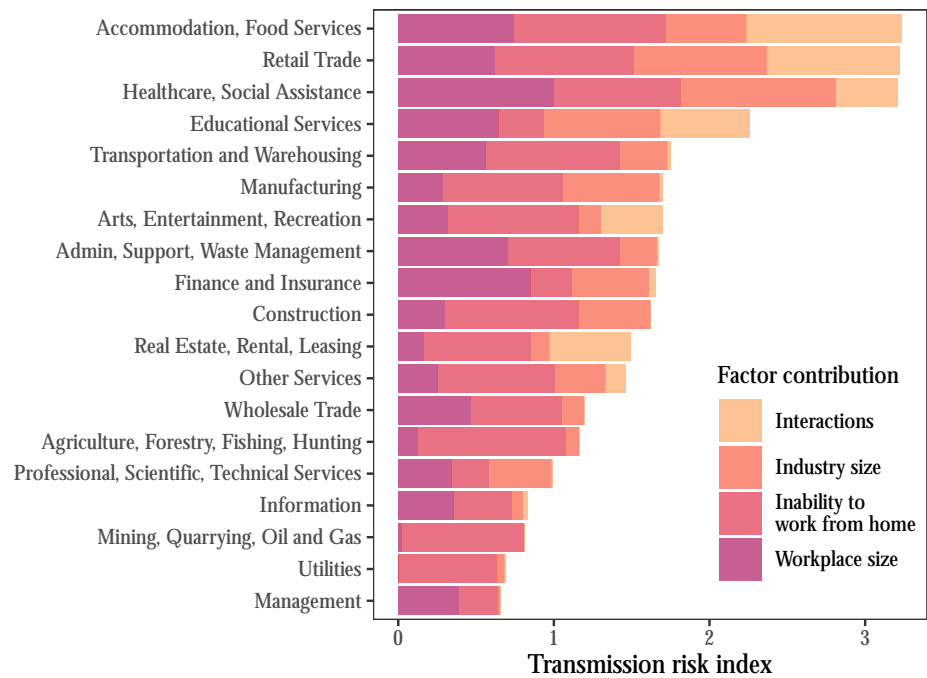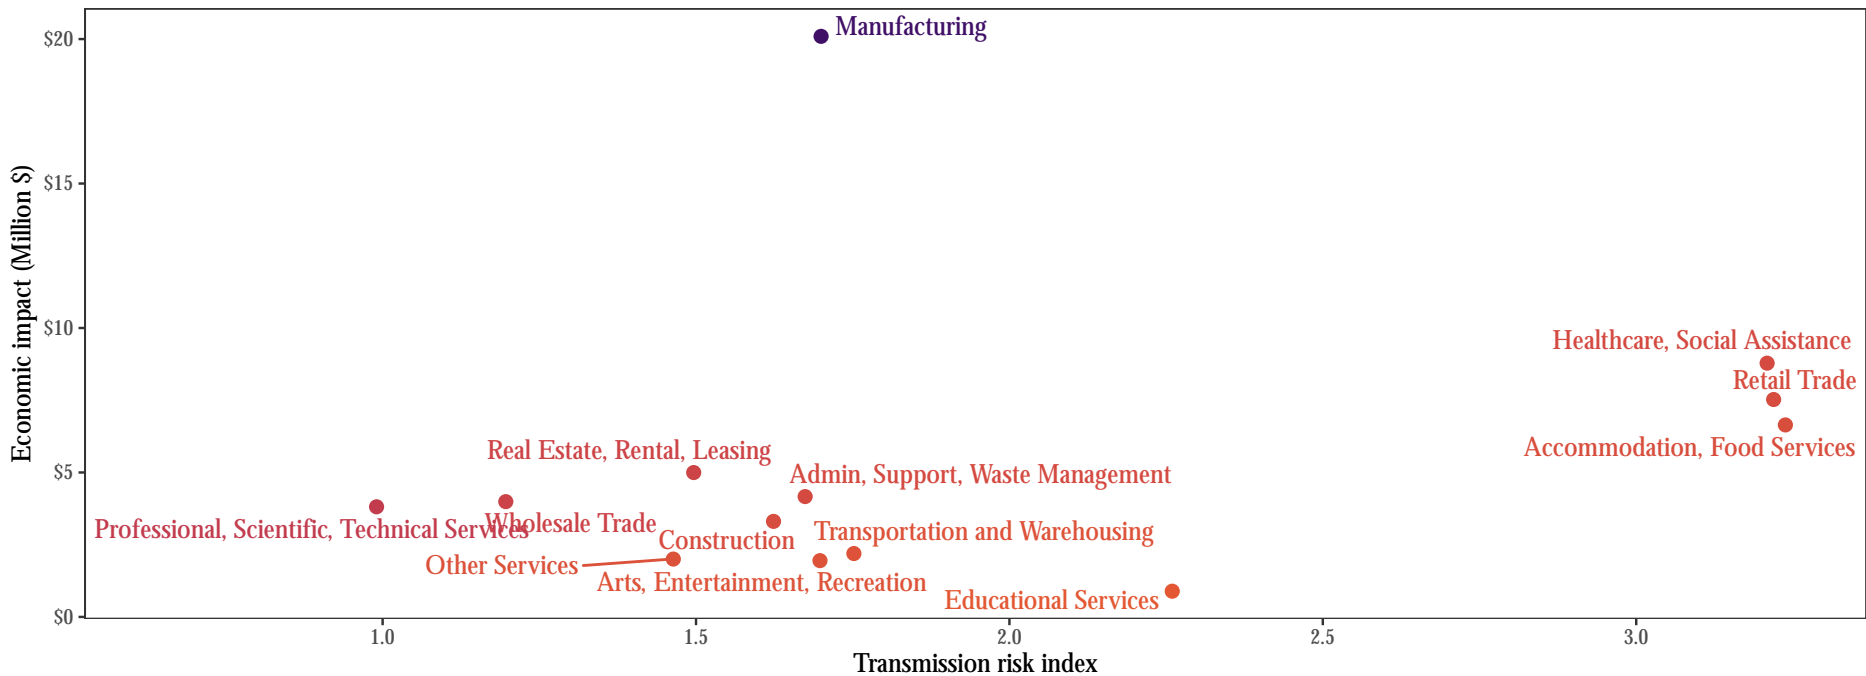

# Florida

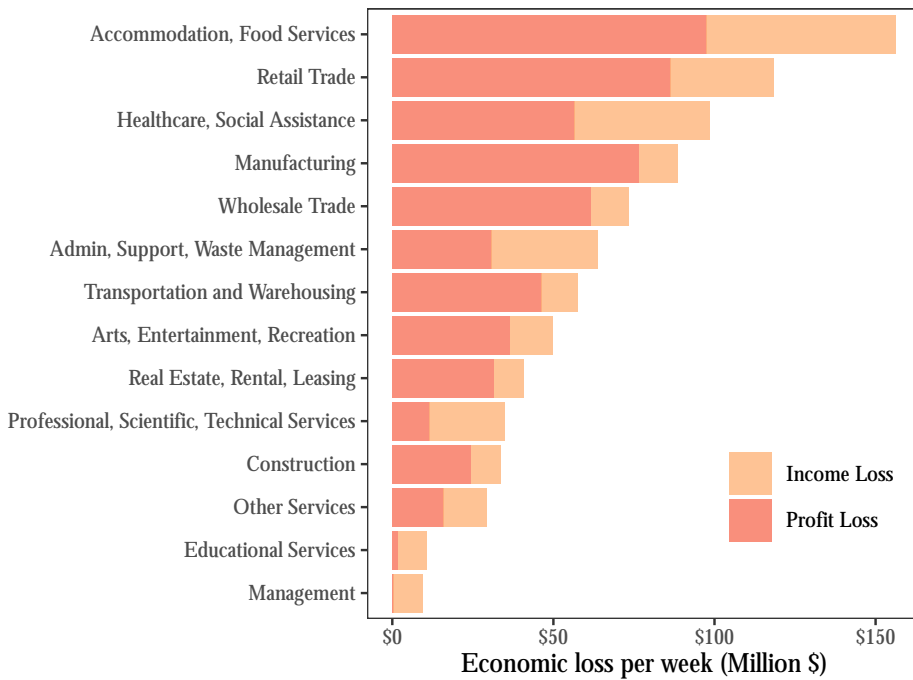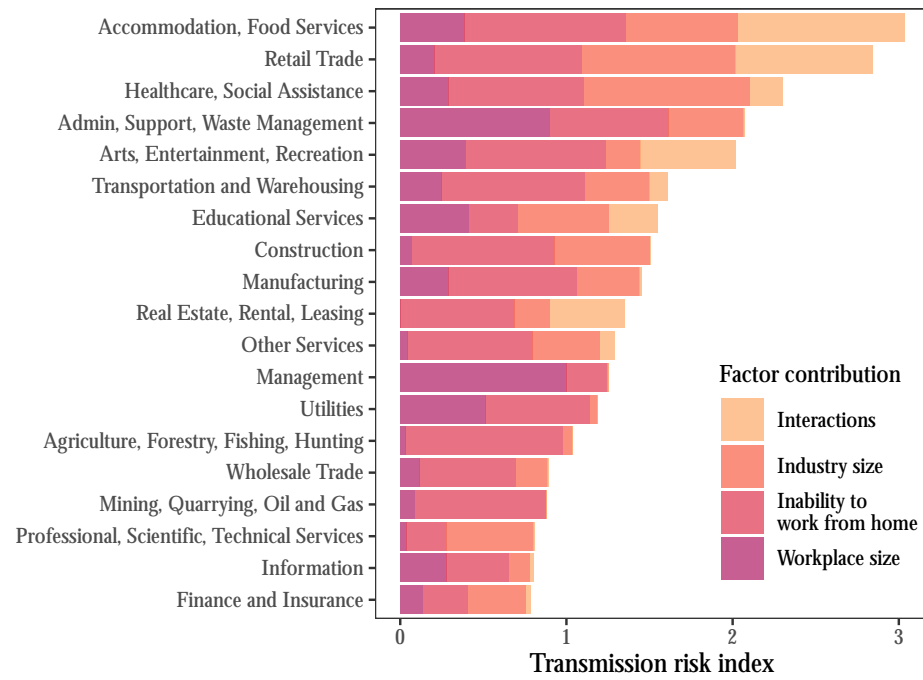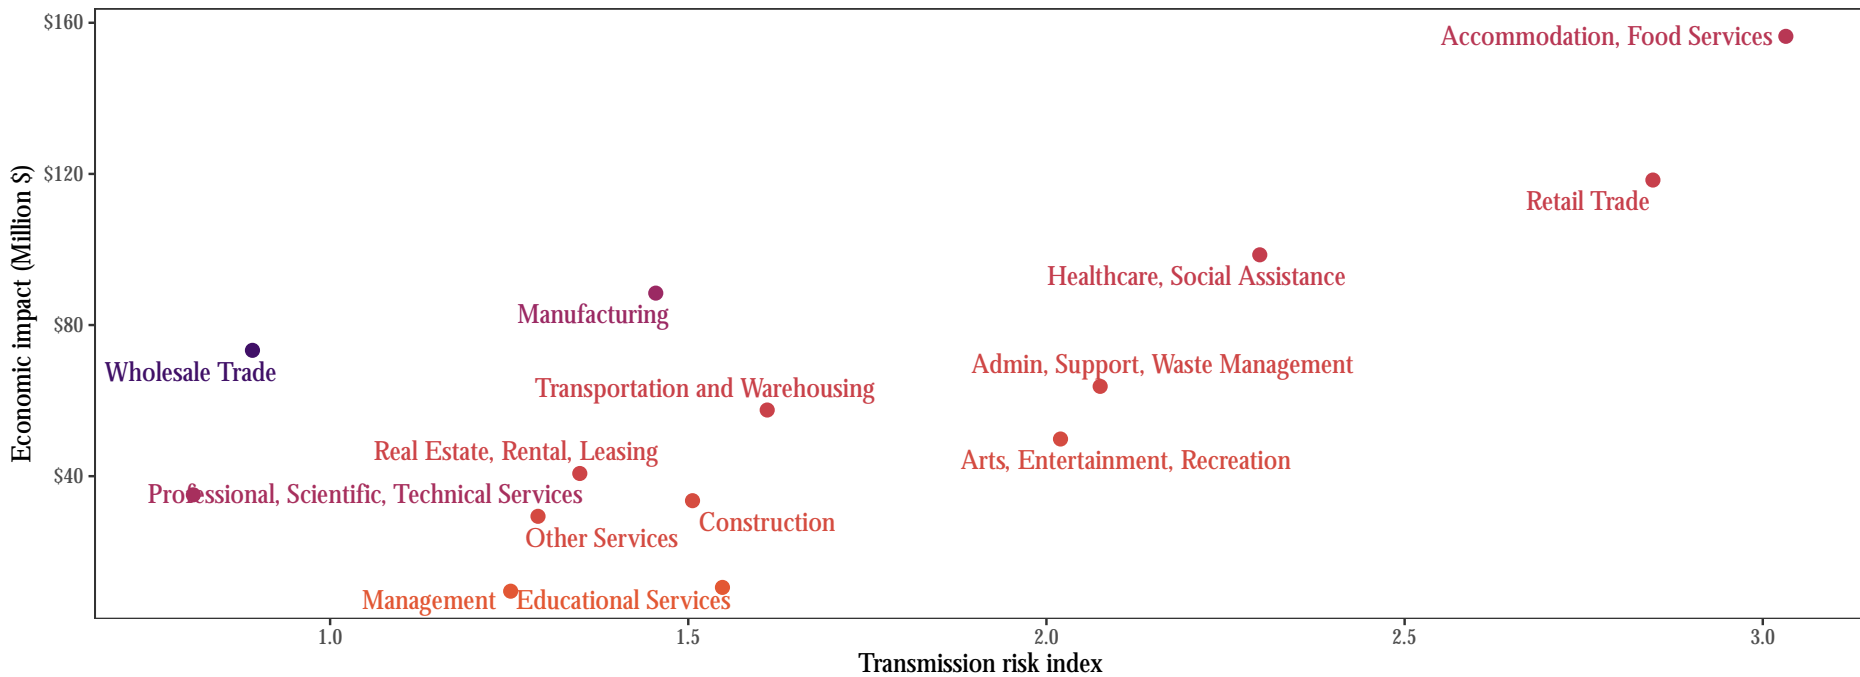

# Georgia

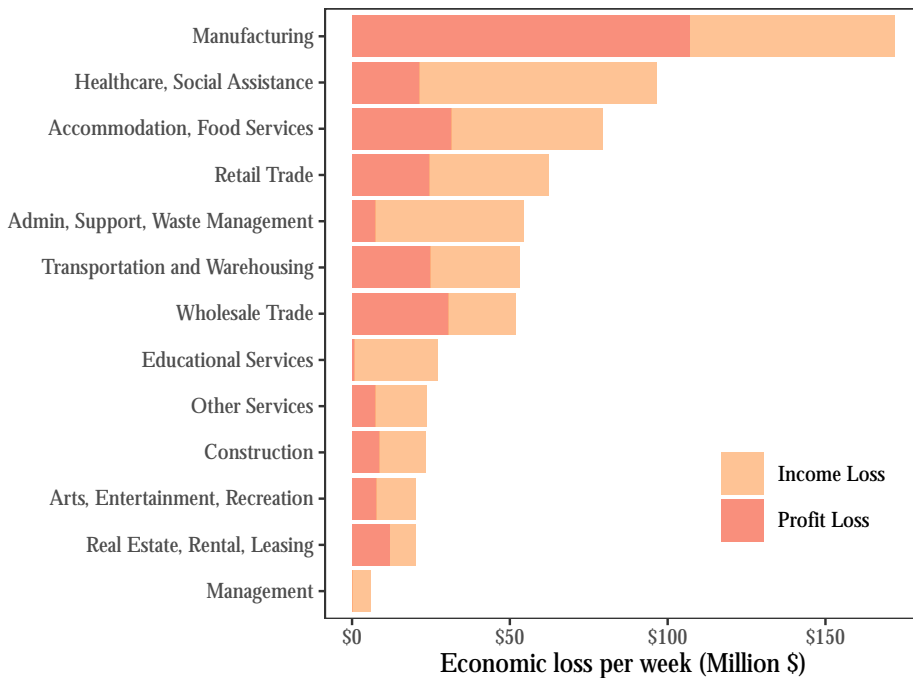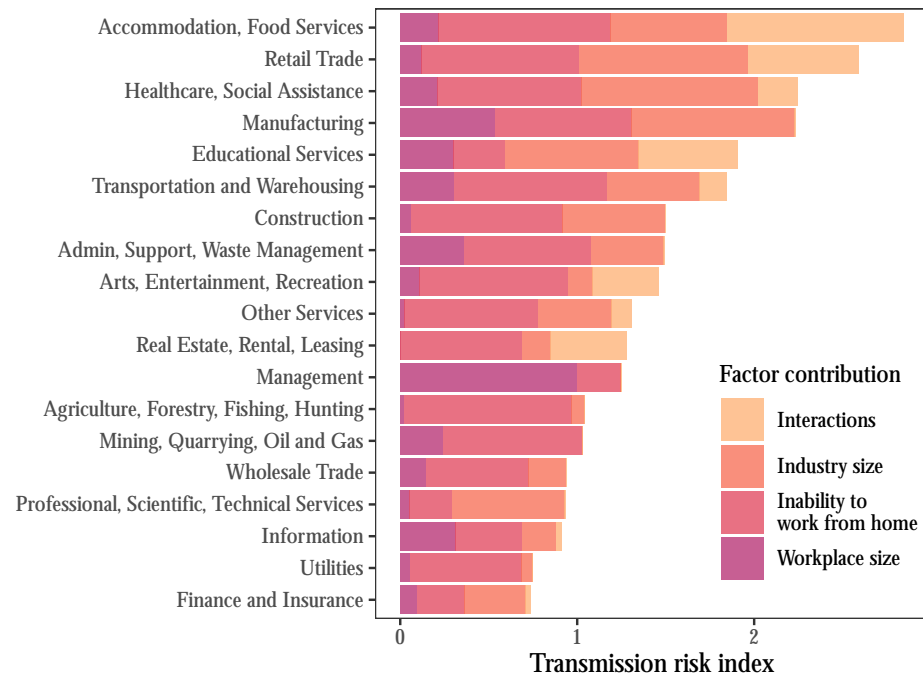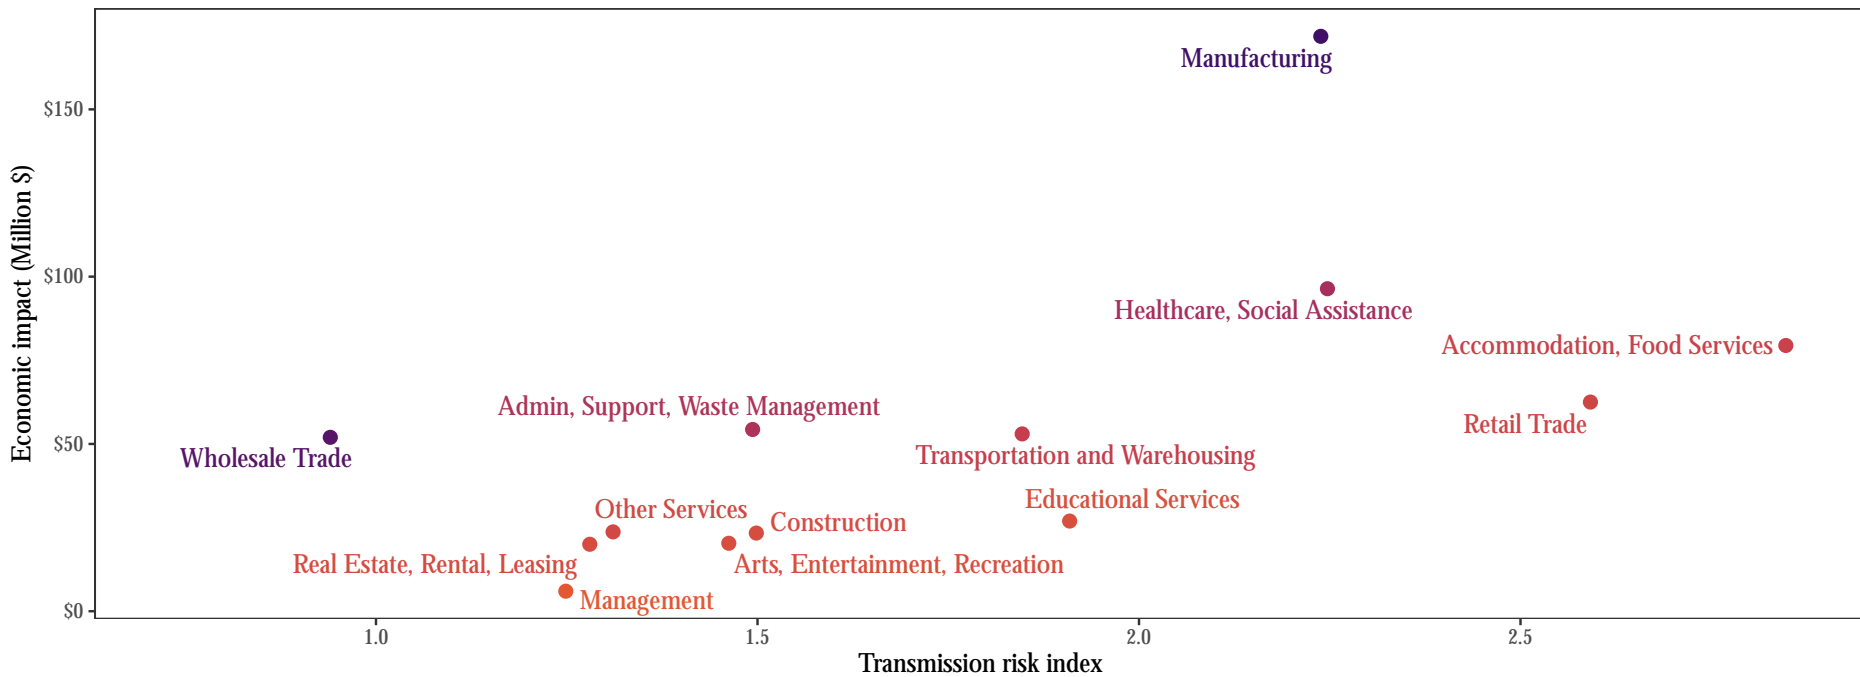

# Hawaii

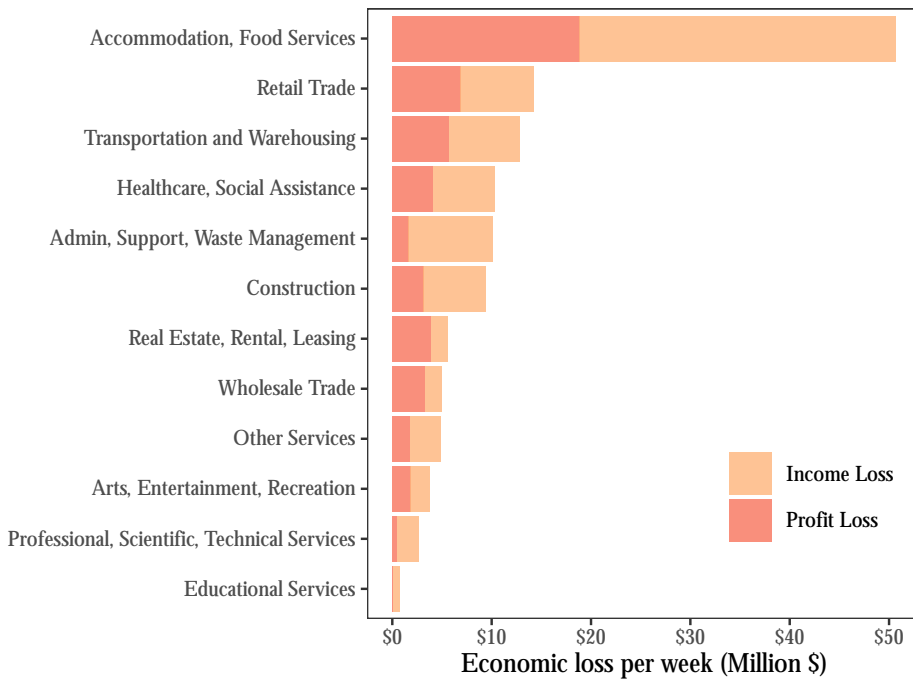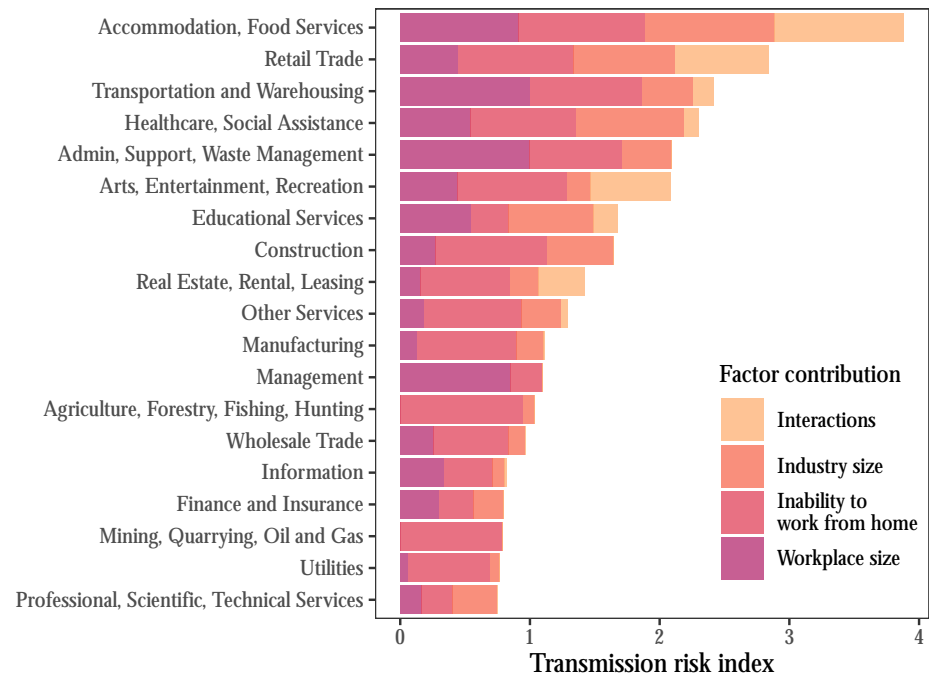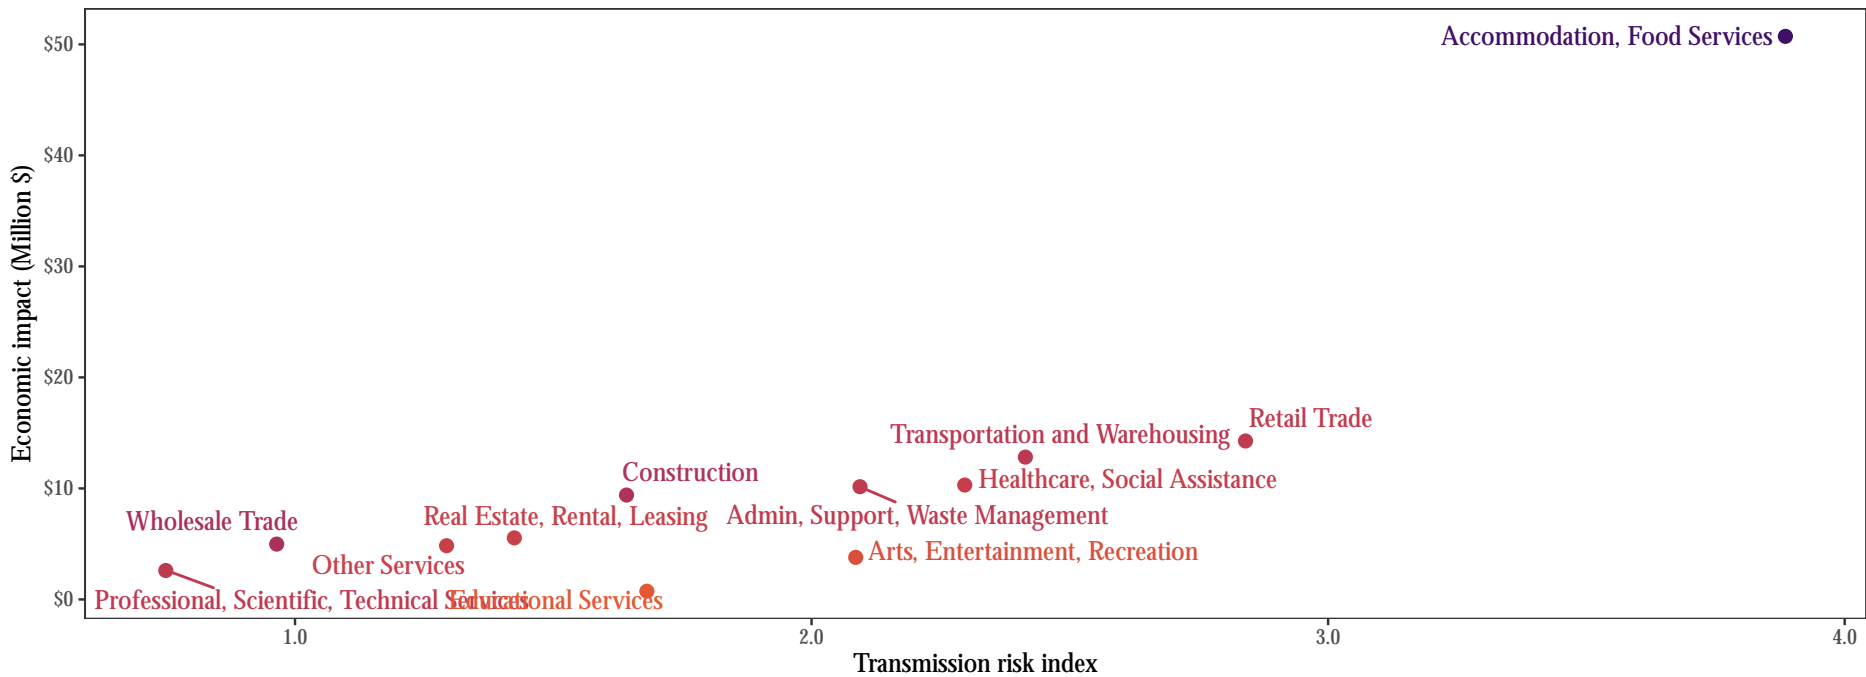

# Idaho

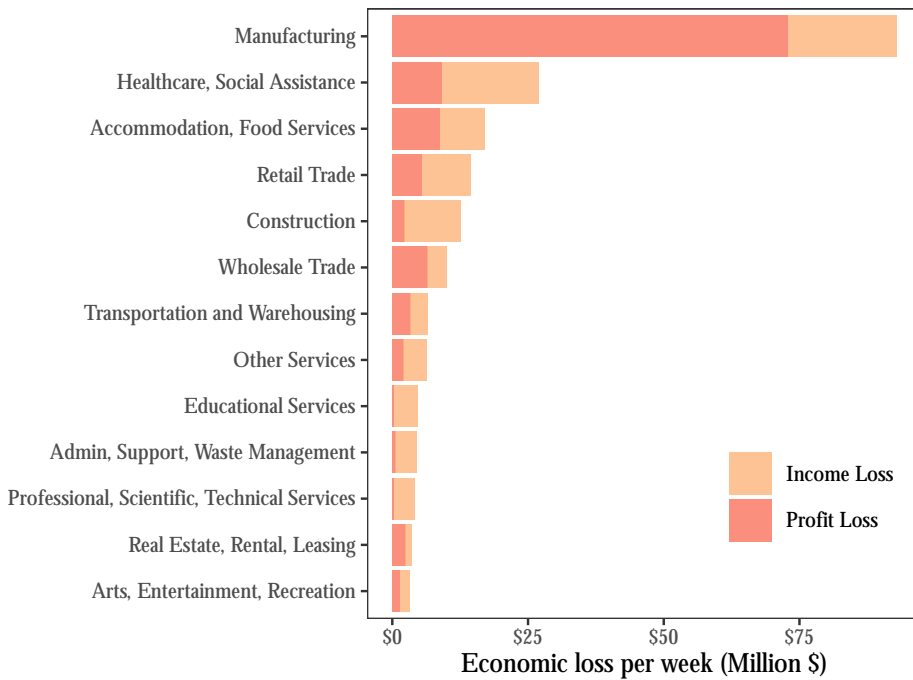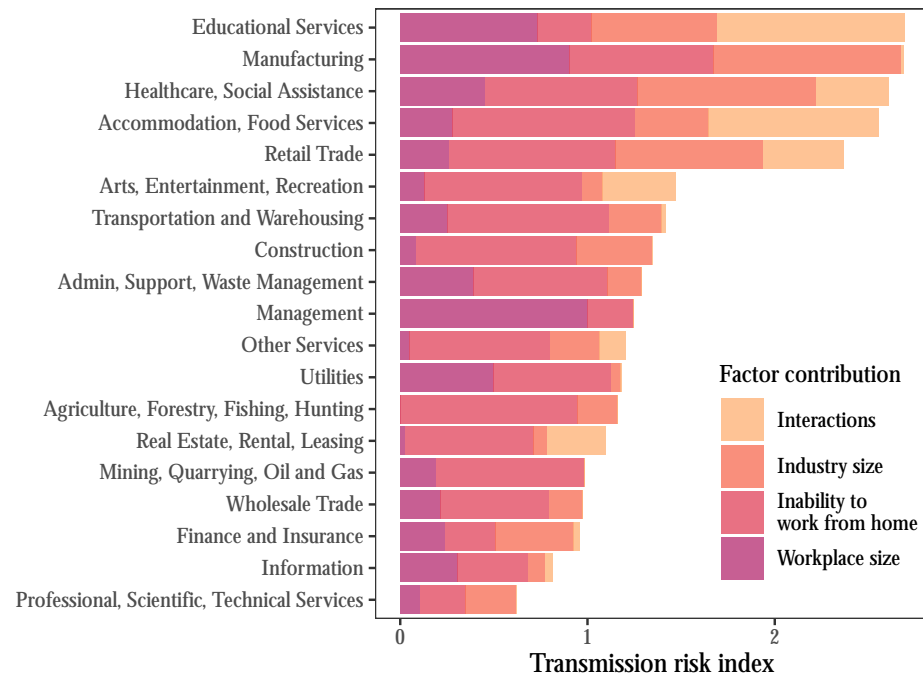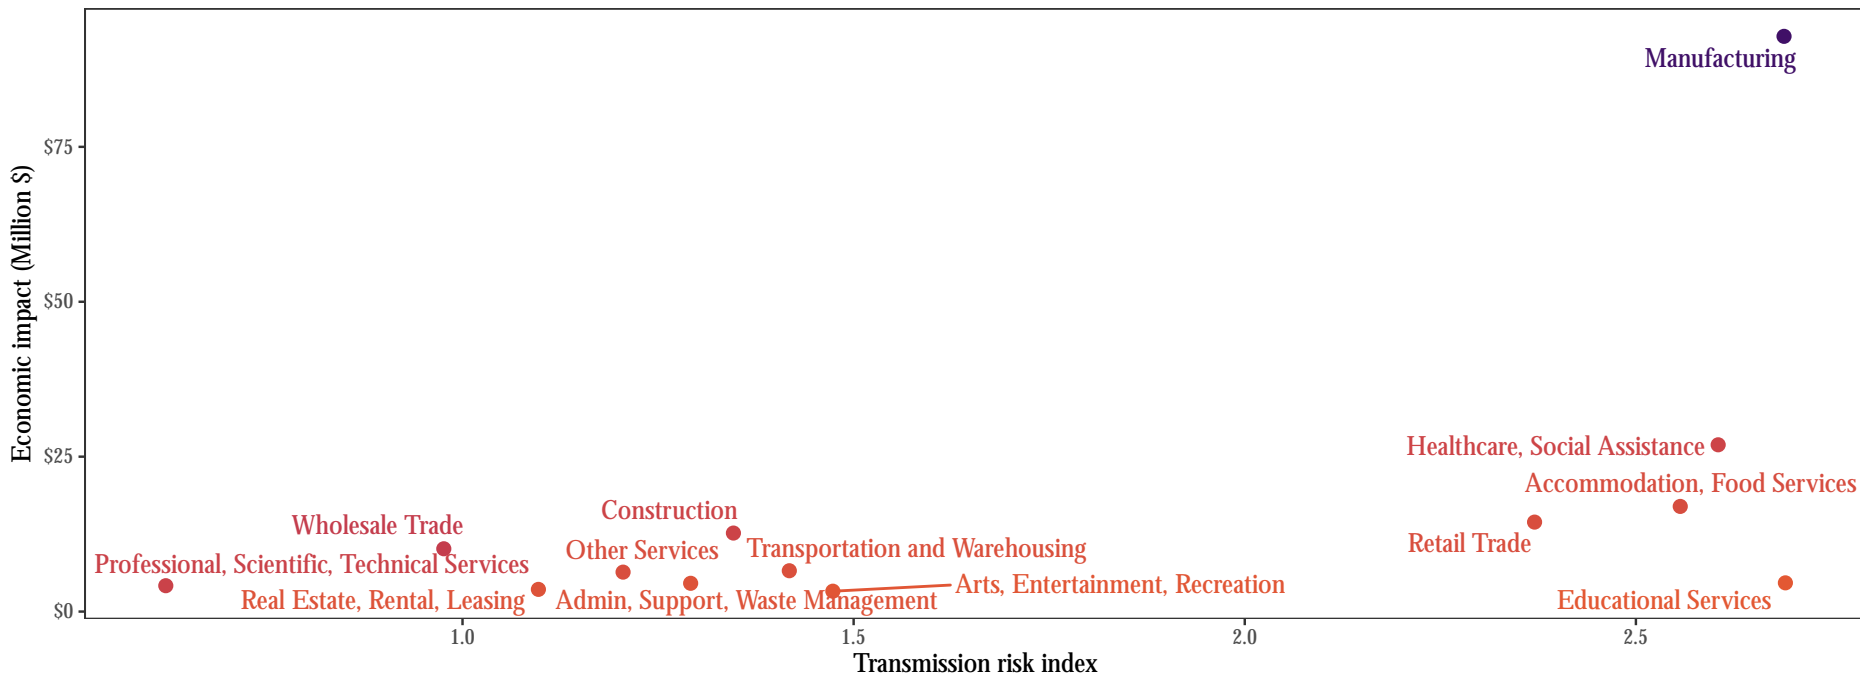

# Illinois

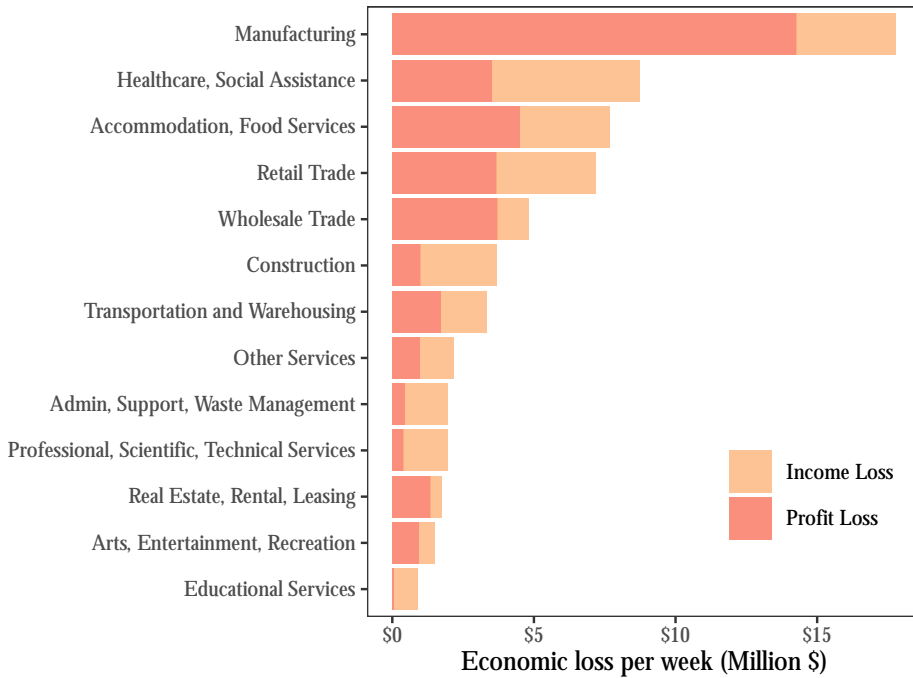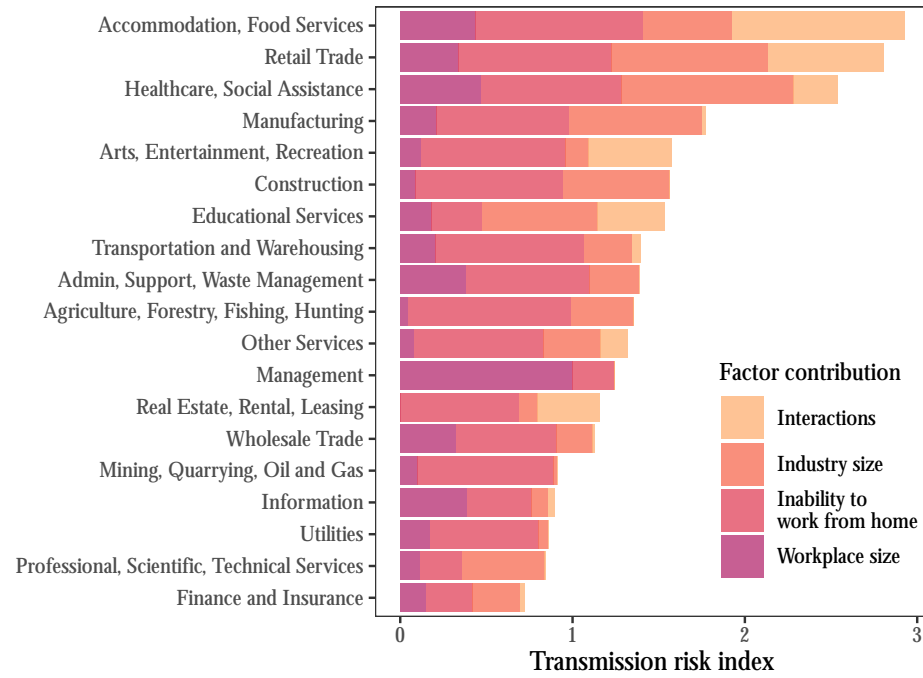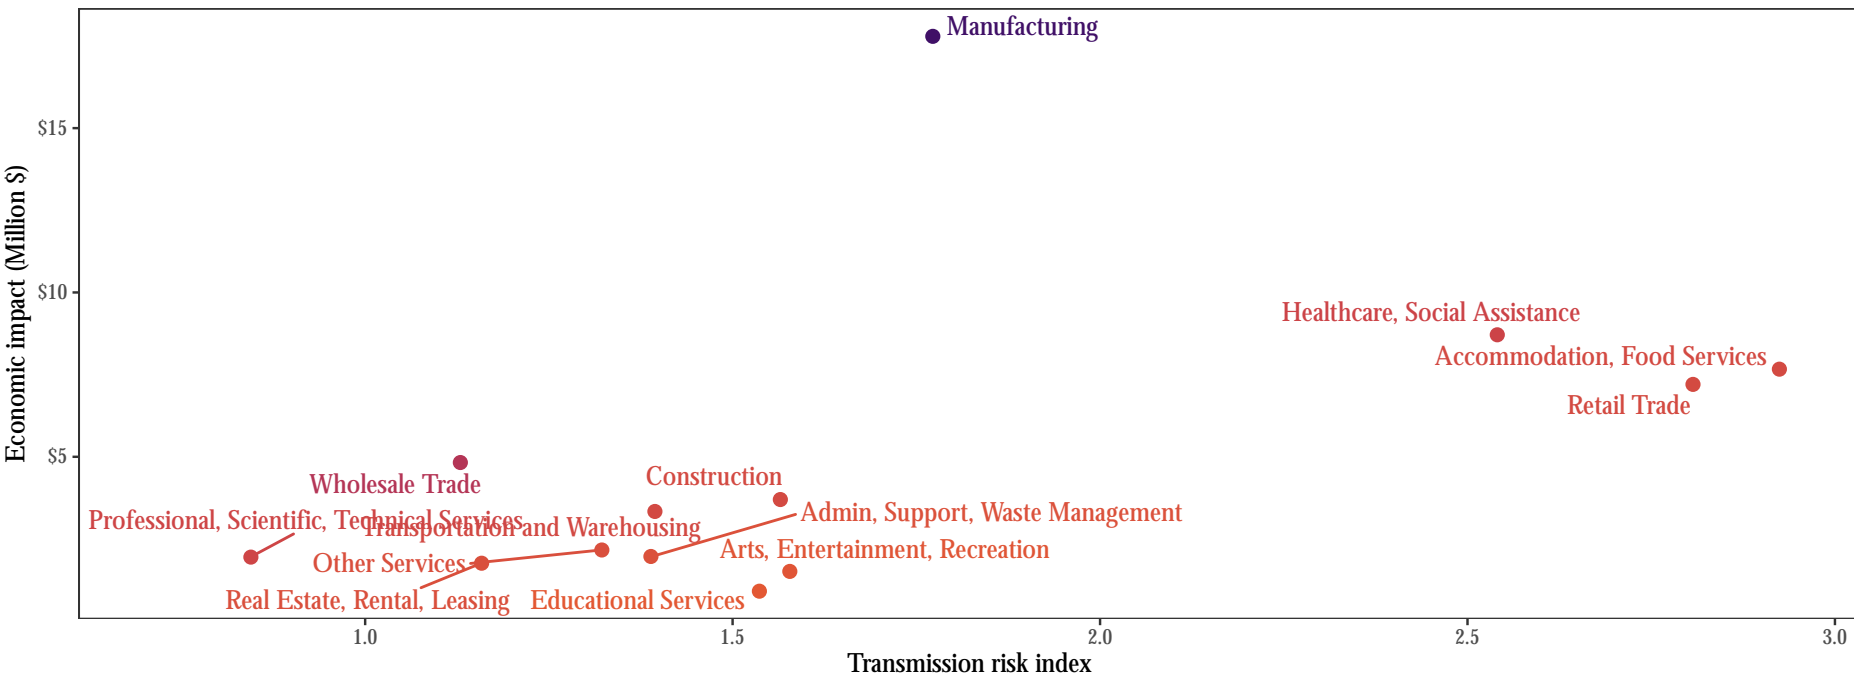

# Indiana

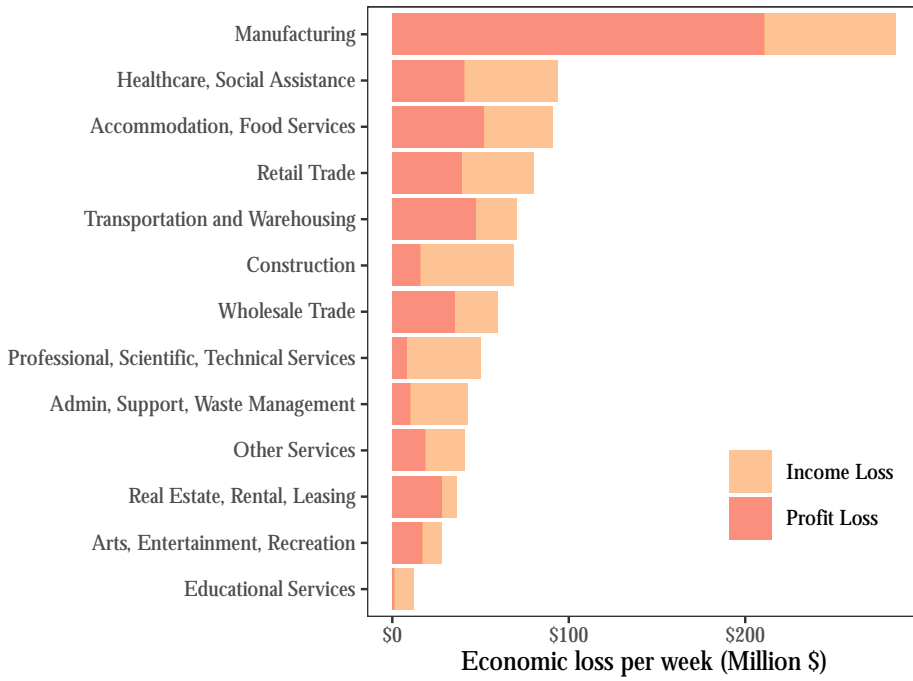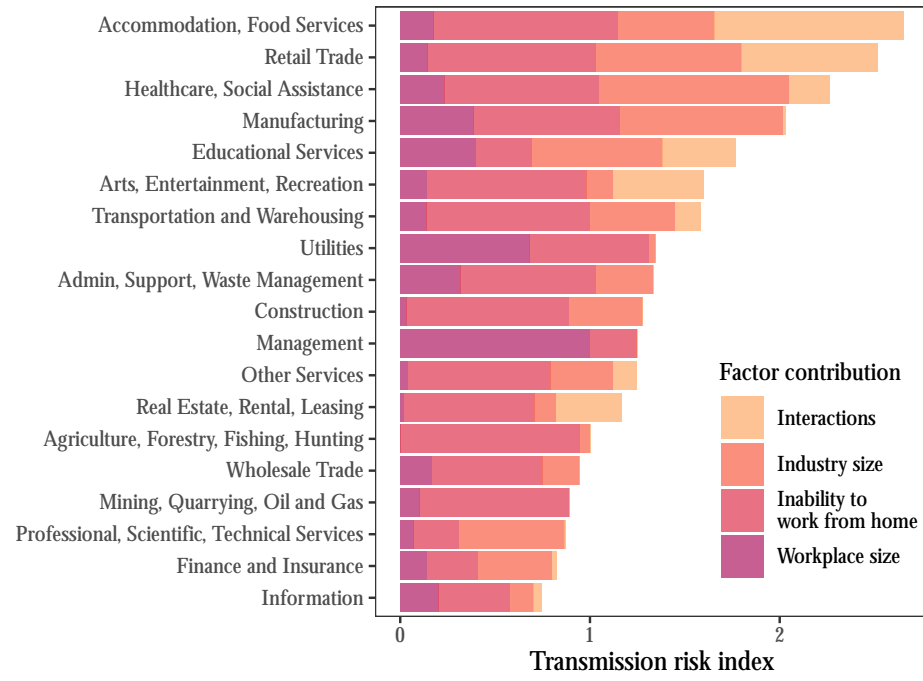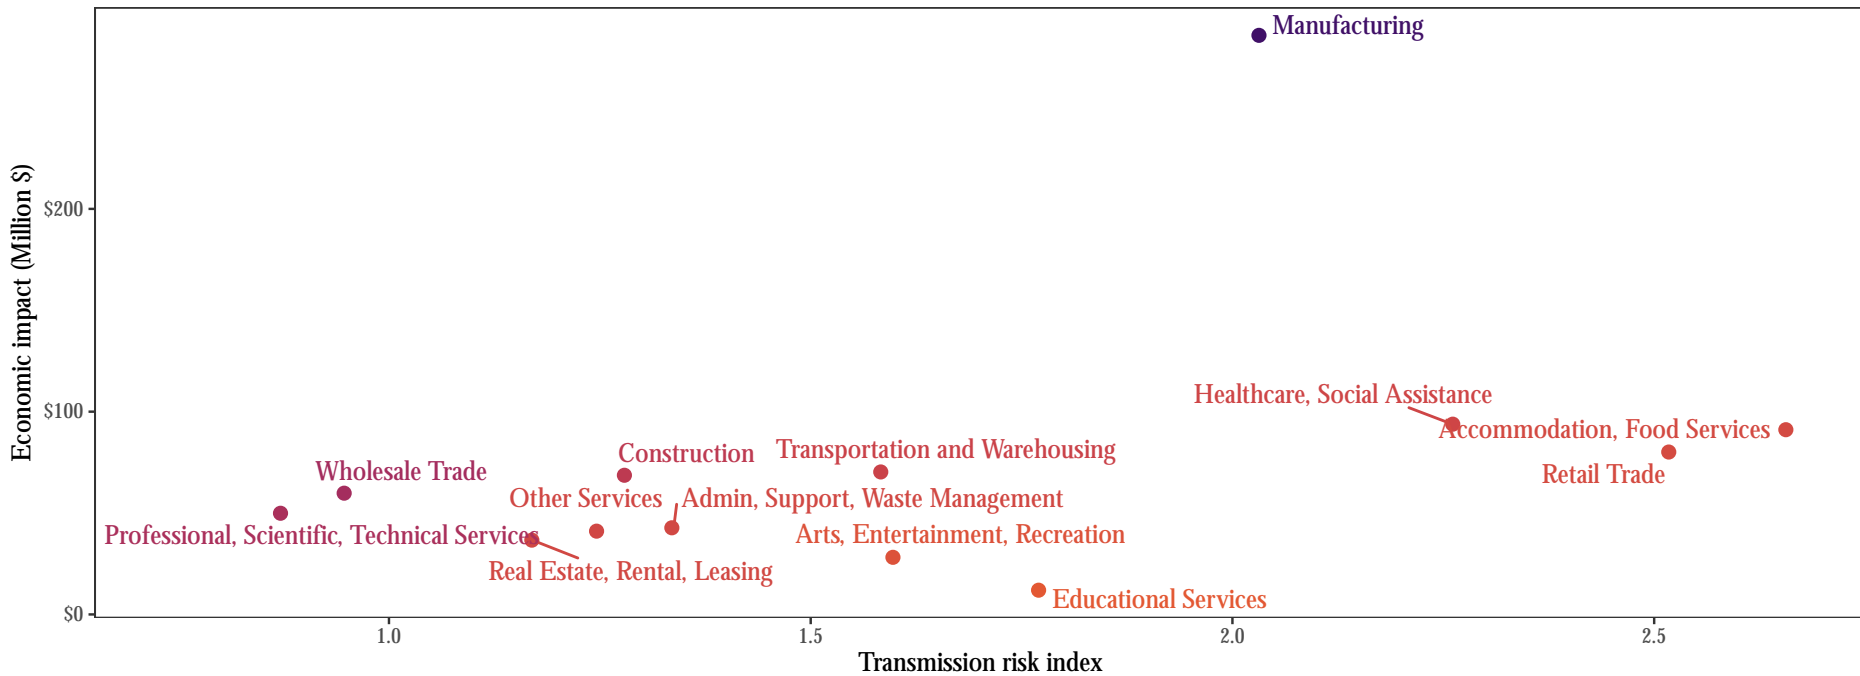

# Iowa

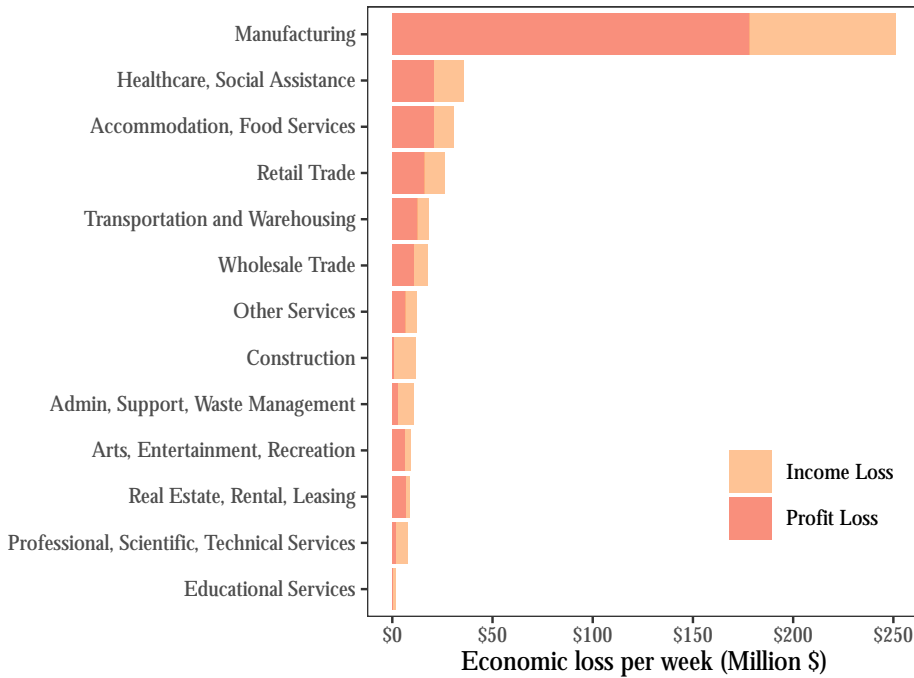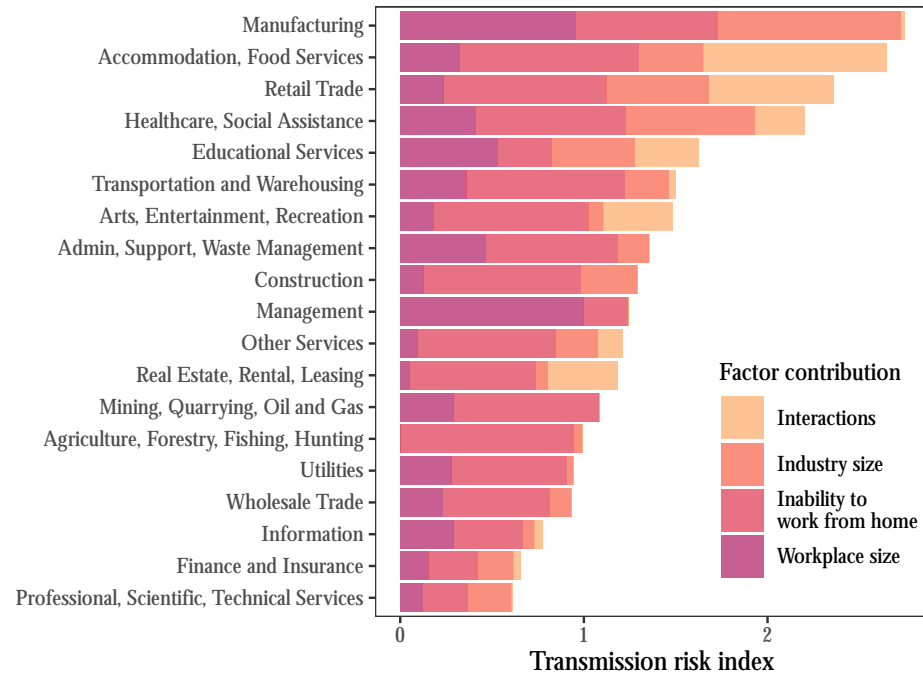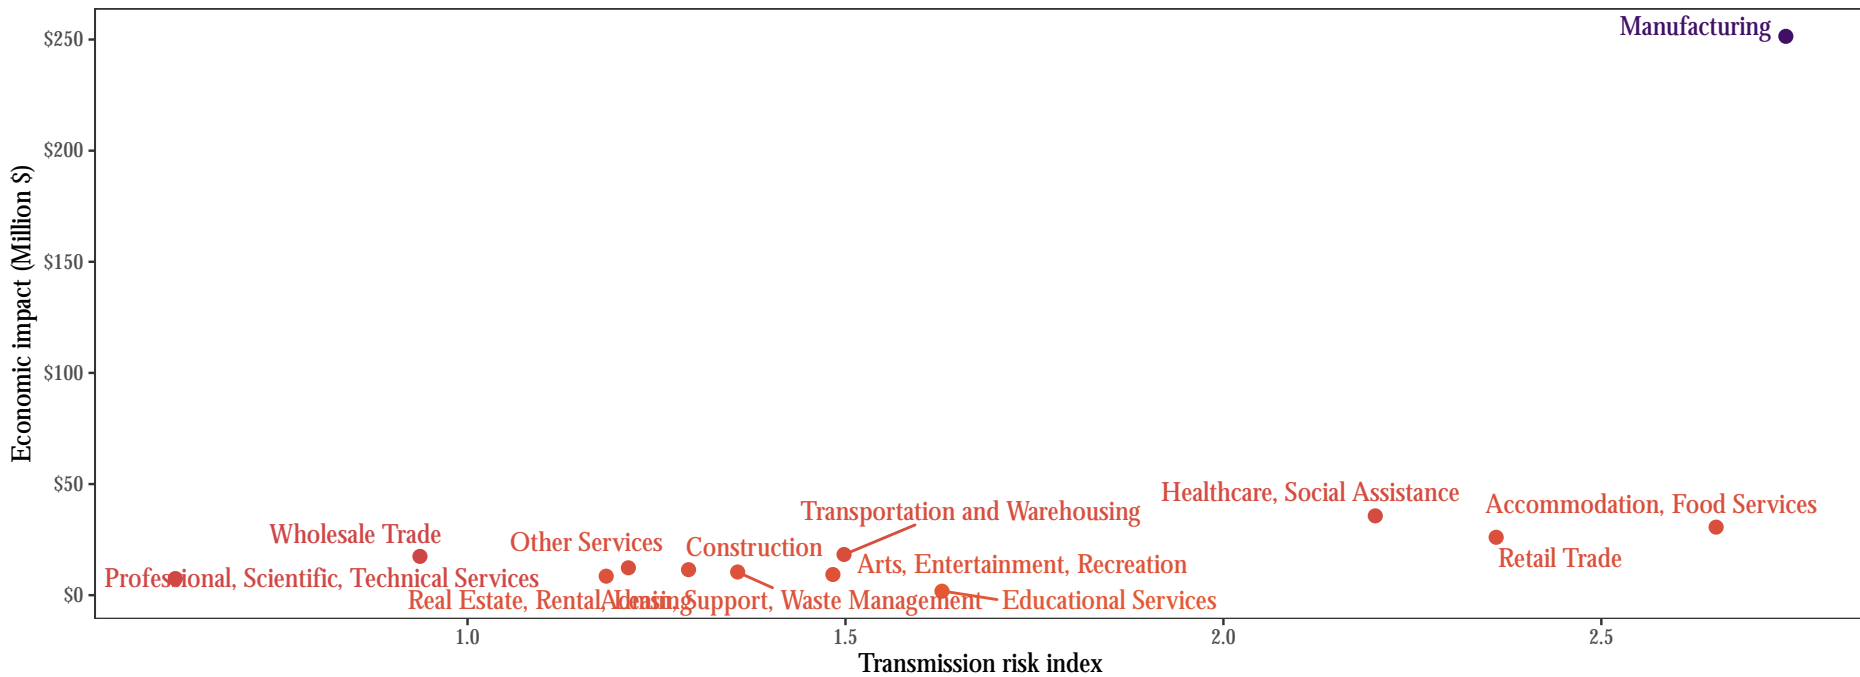



# Kansas

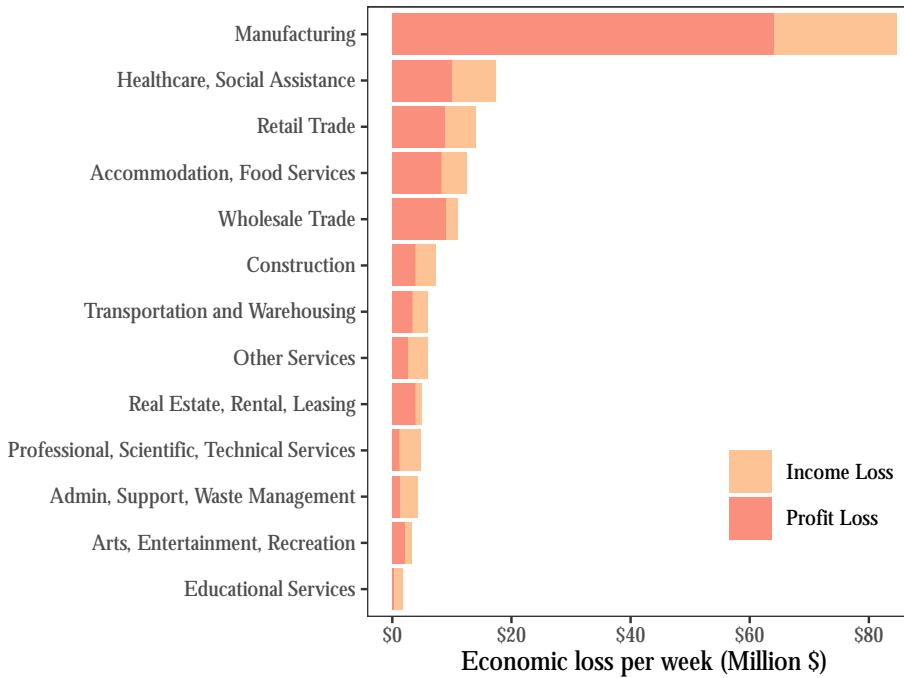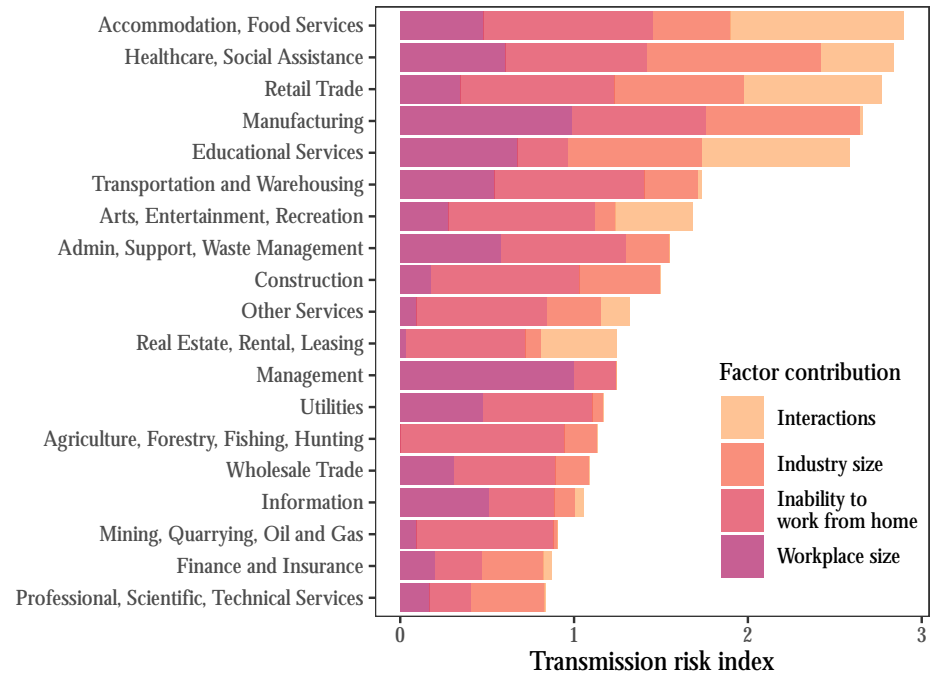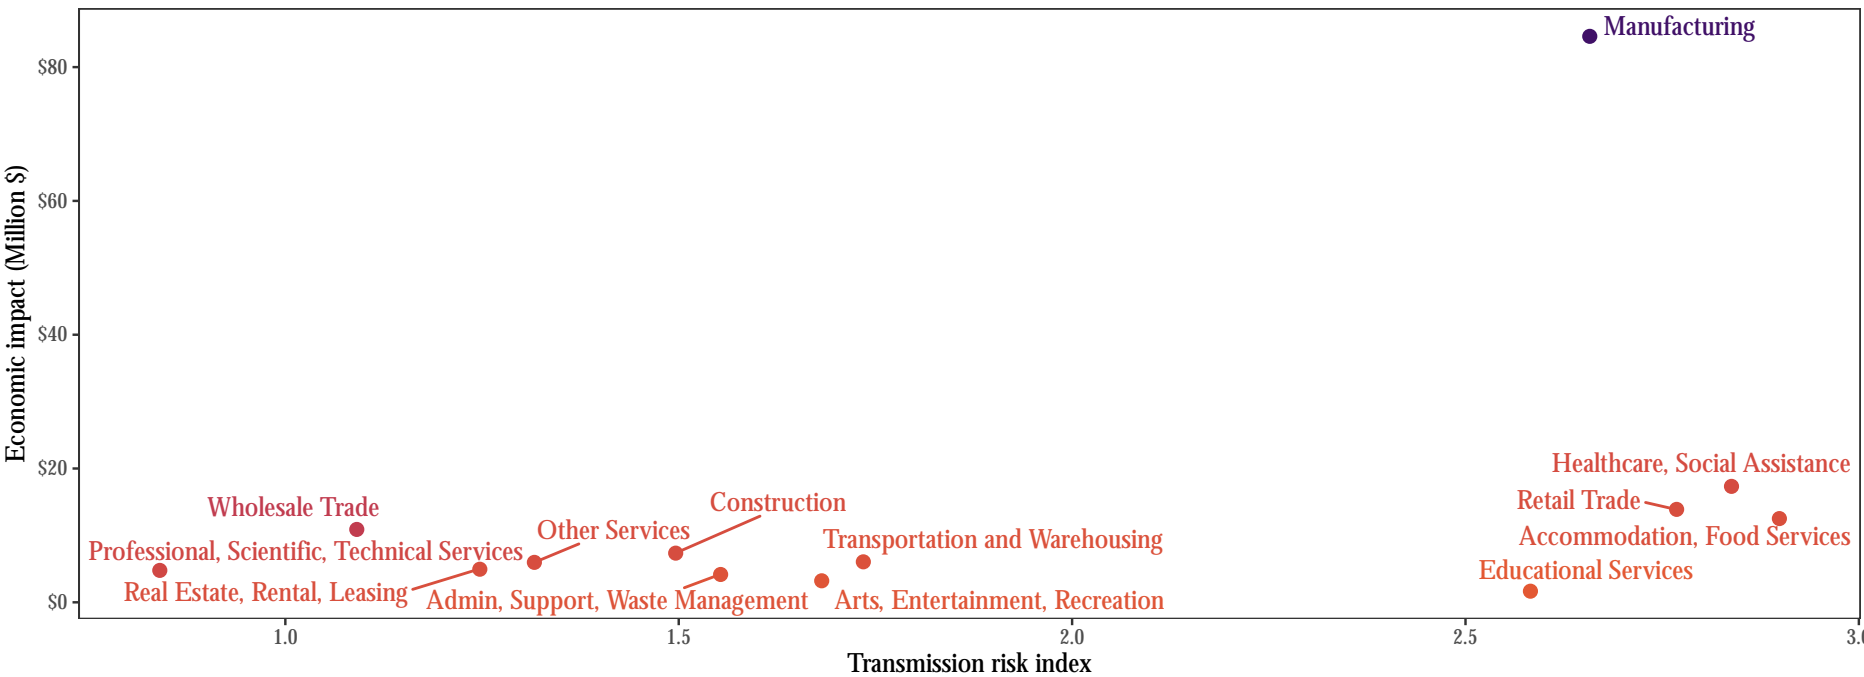

# Kentucky

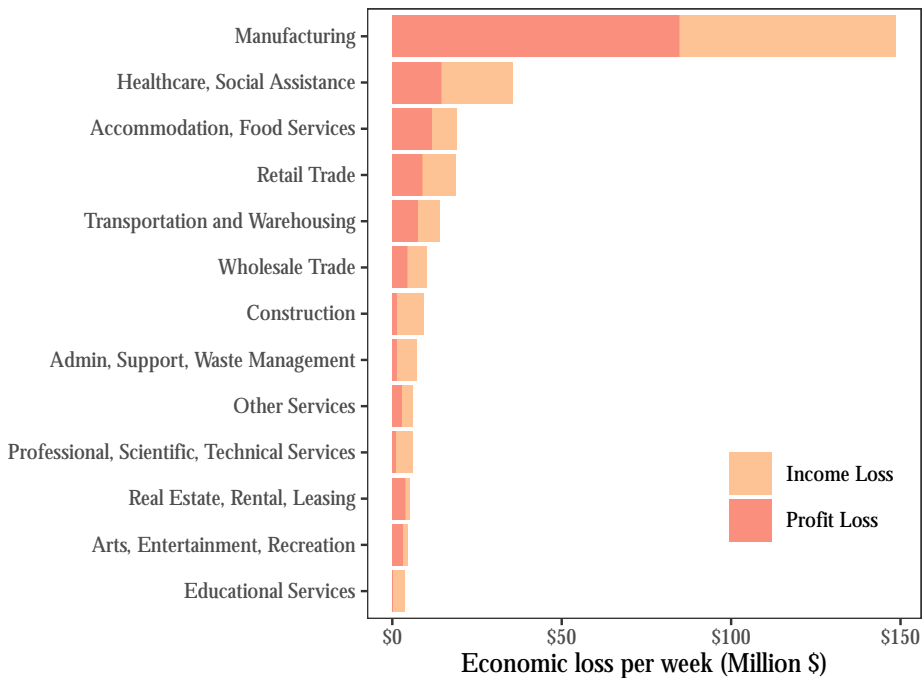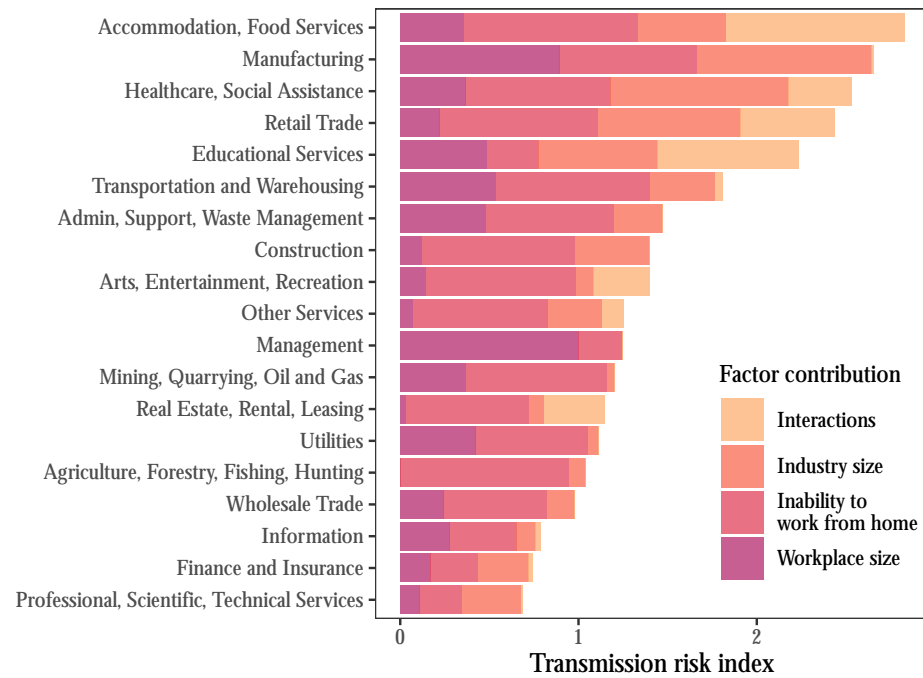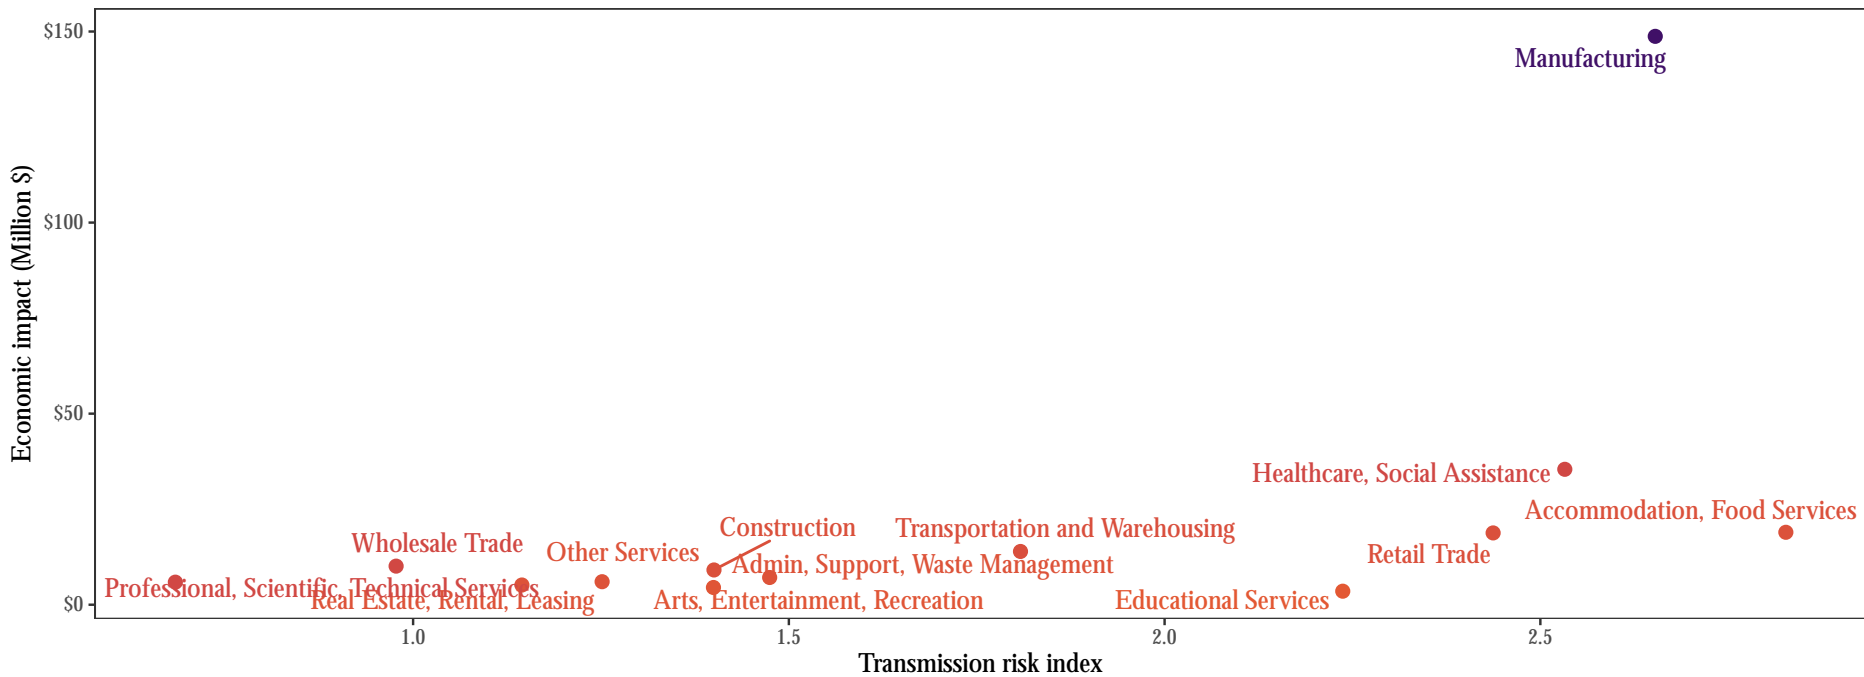

# Louisiana

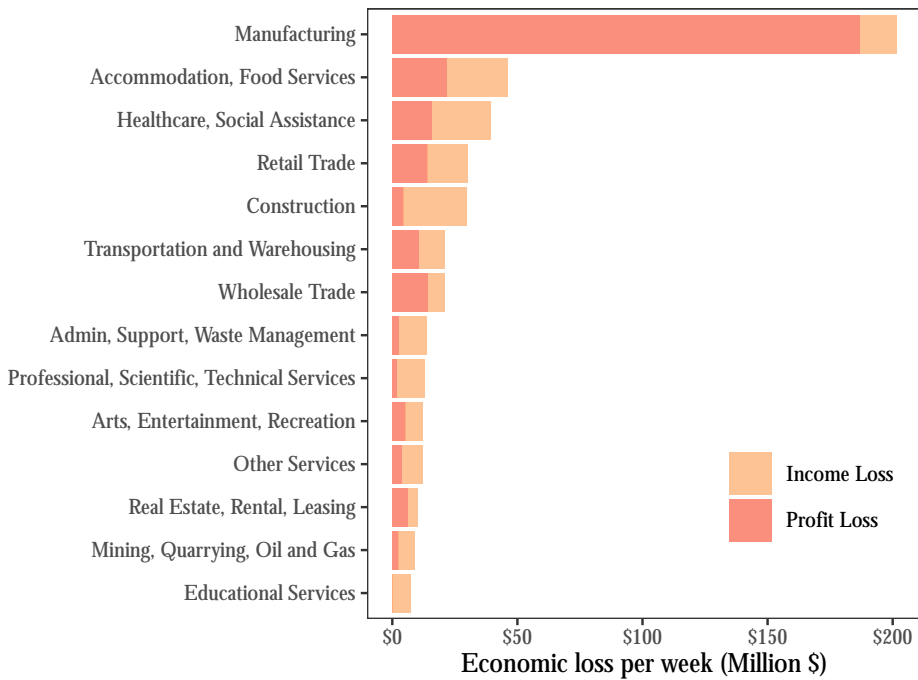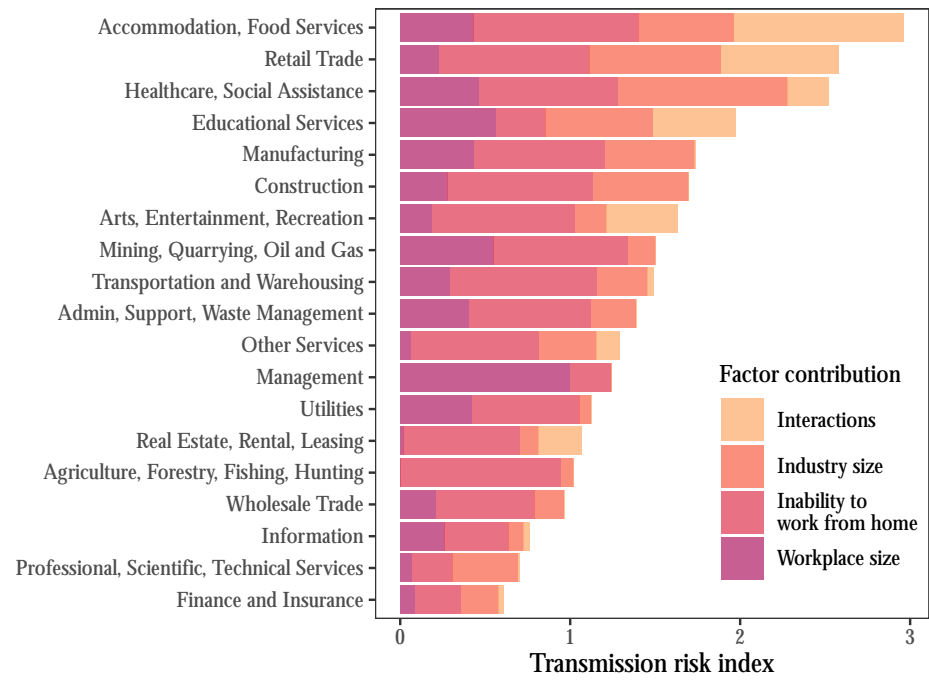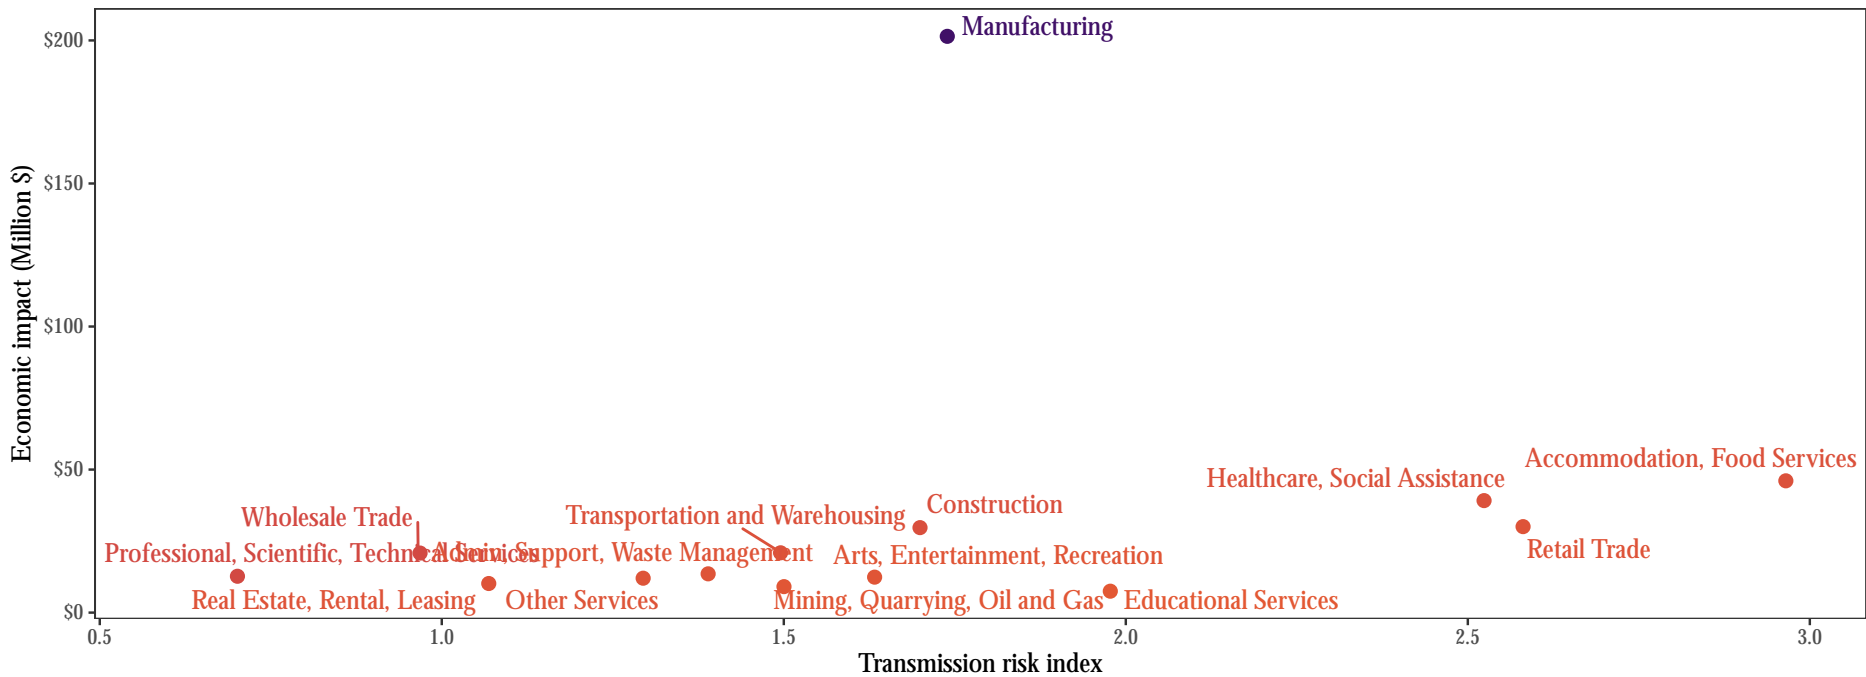

# Maine

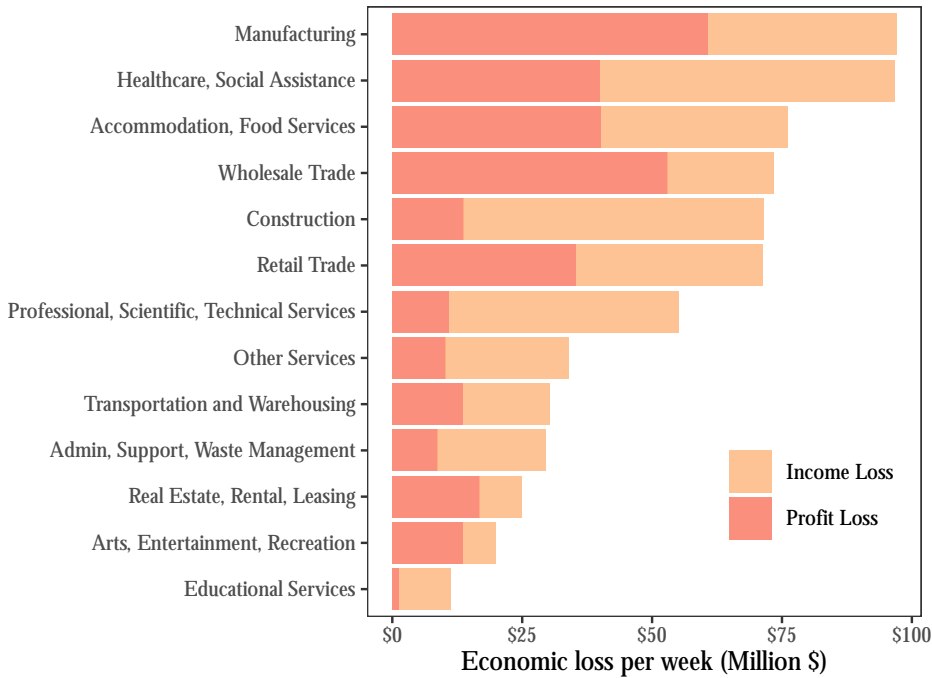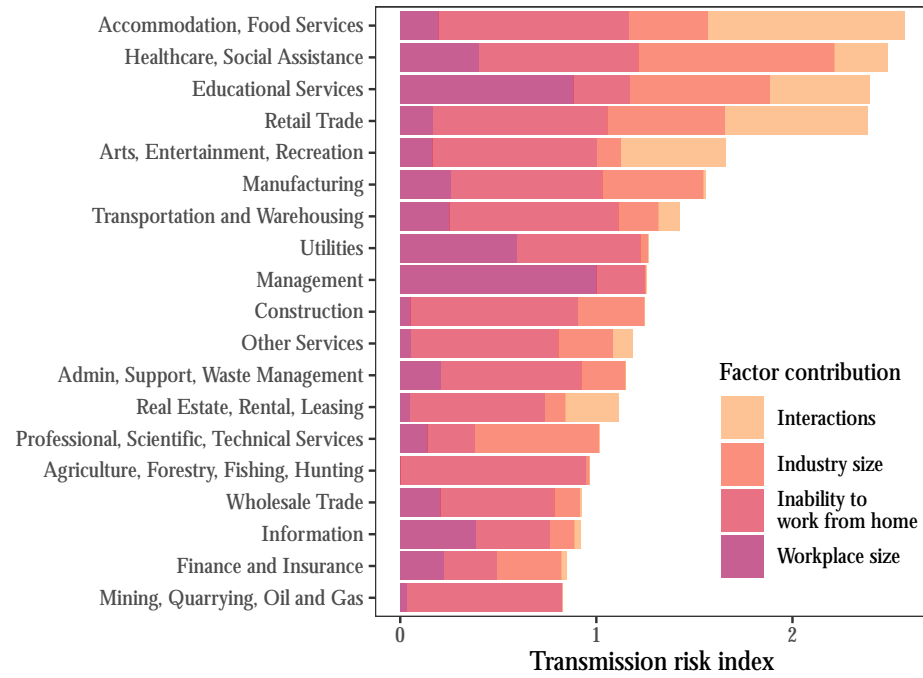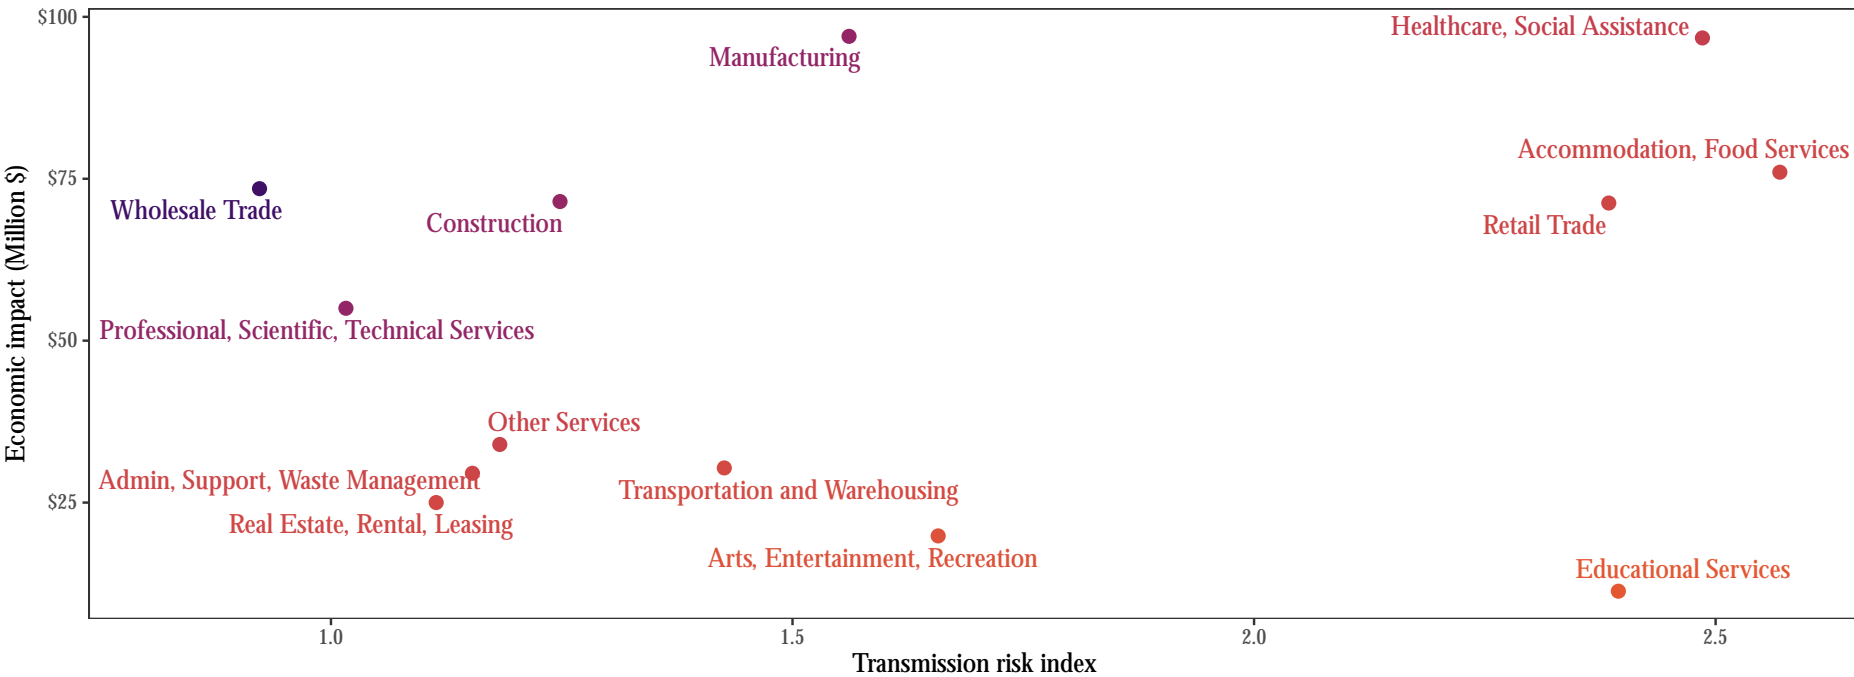

# Maryland

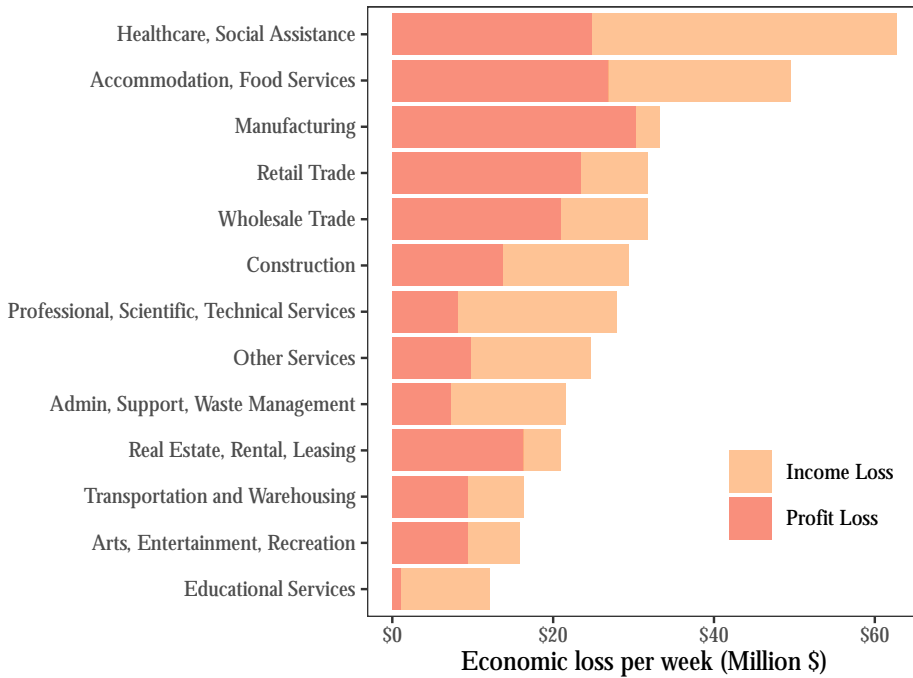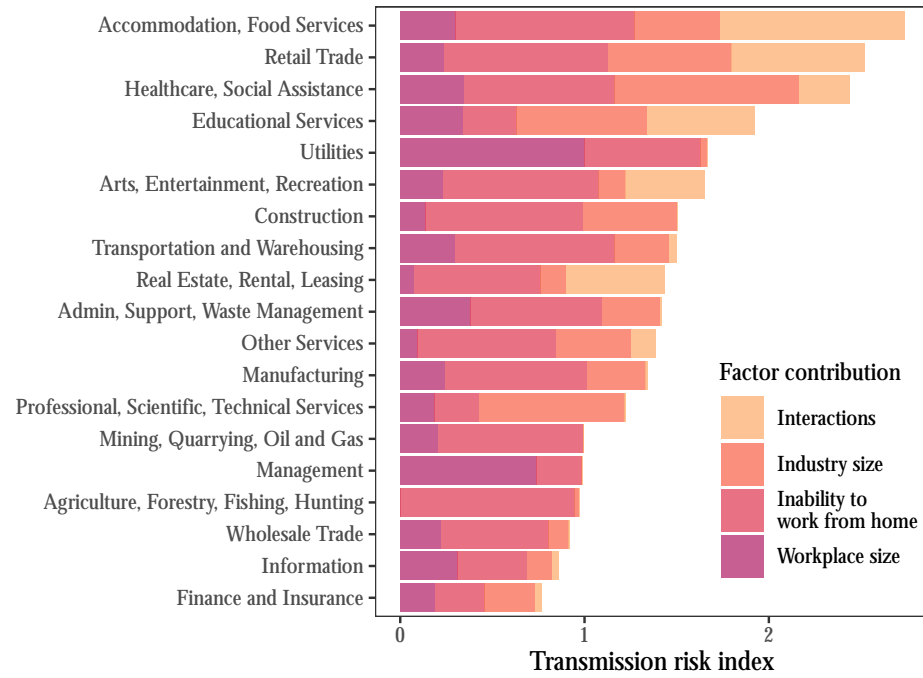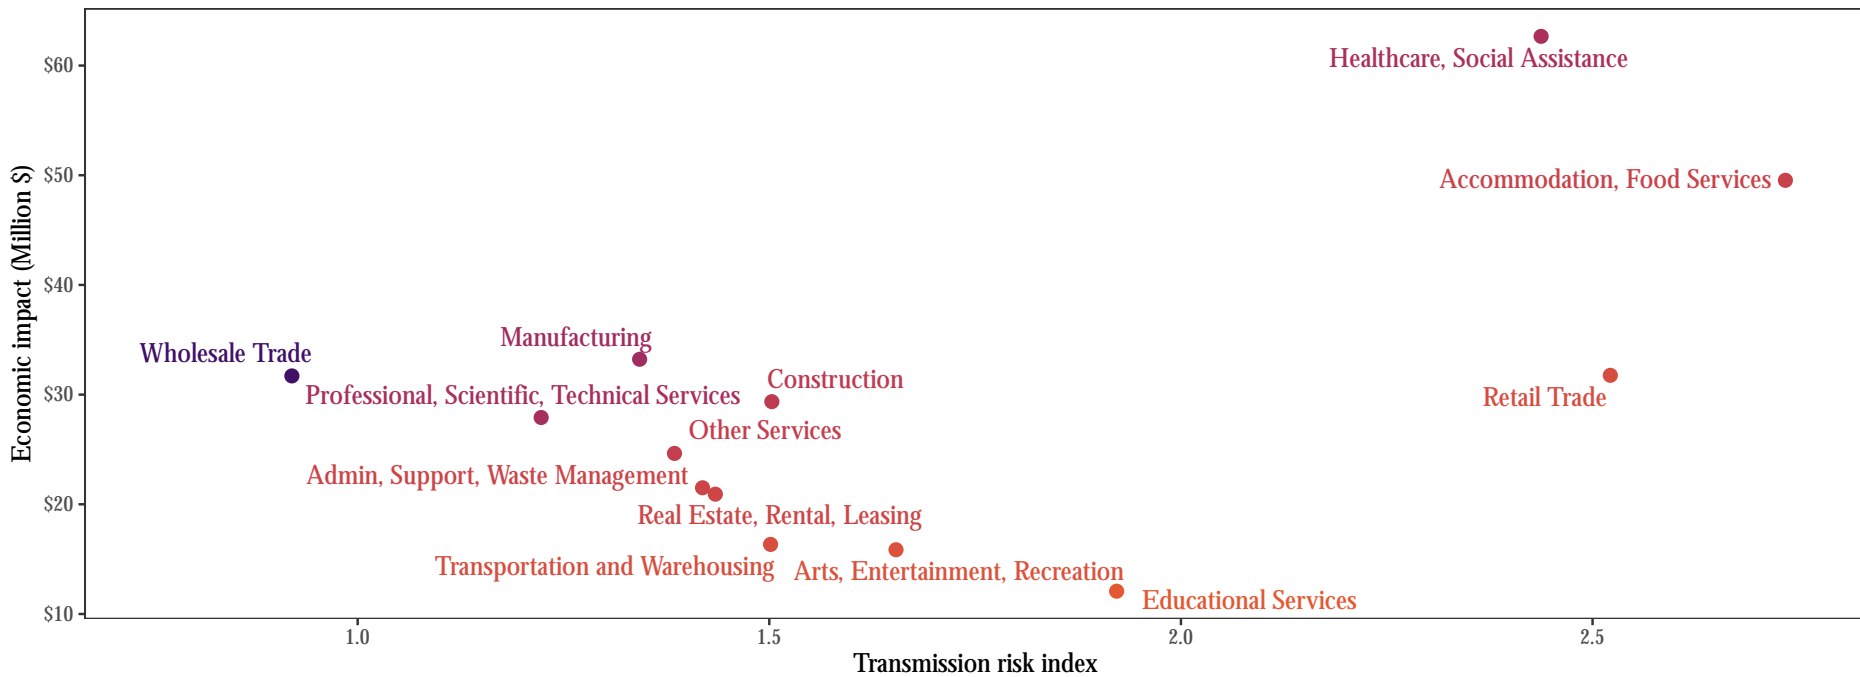

# Massachusetts

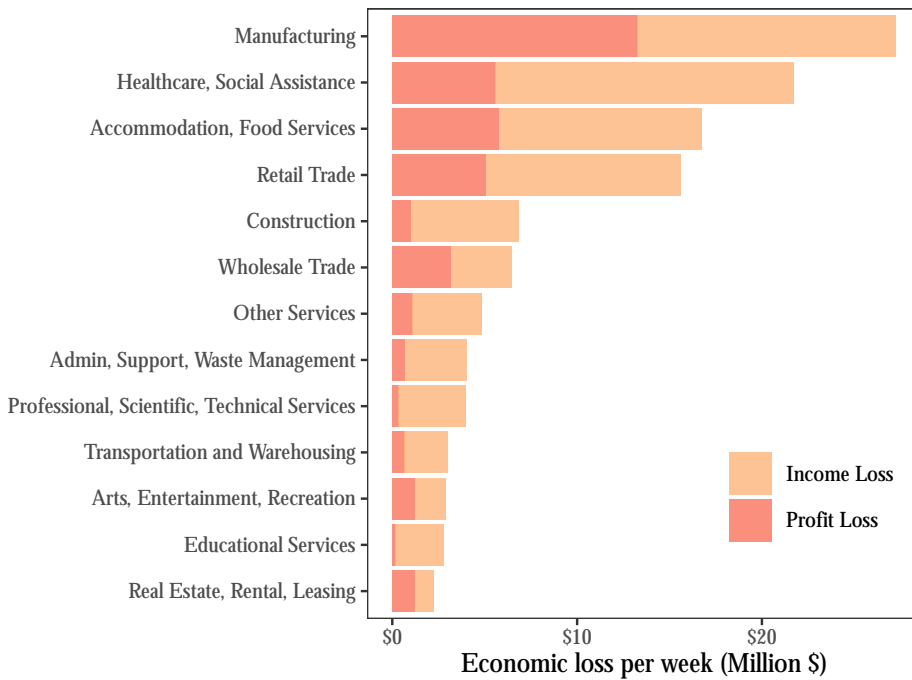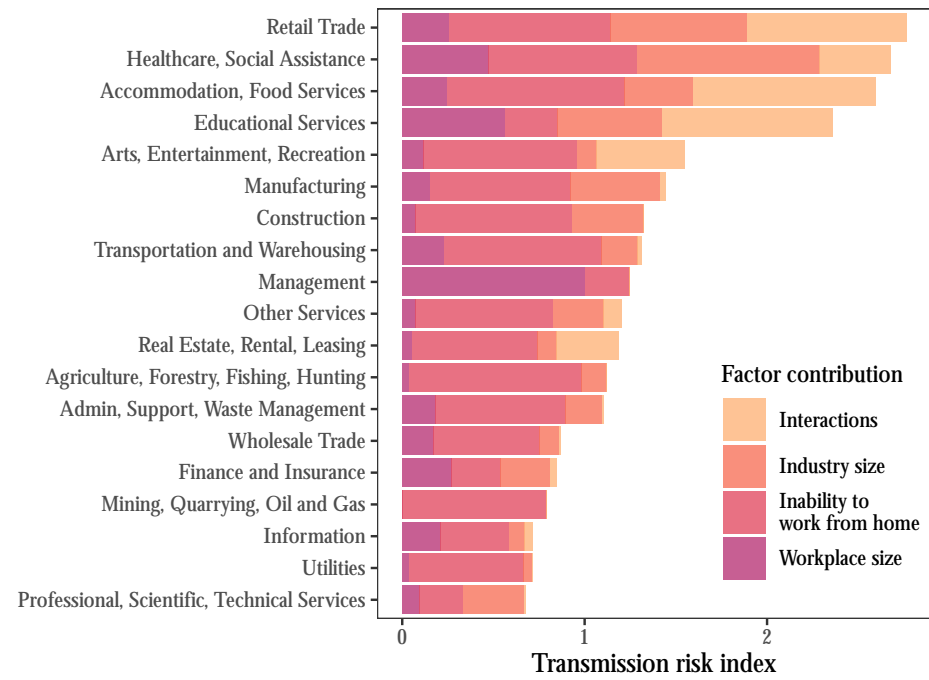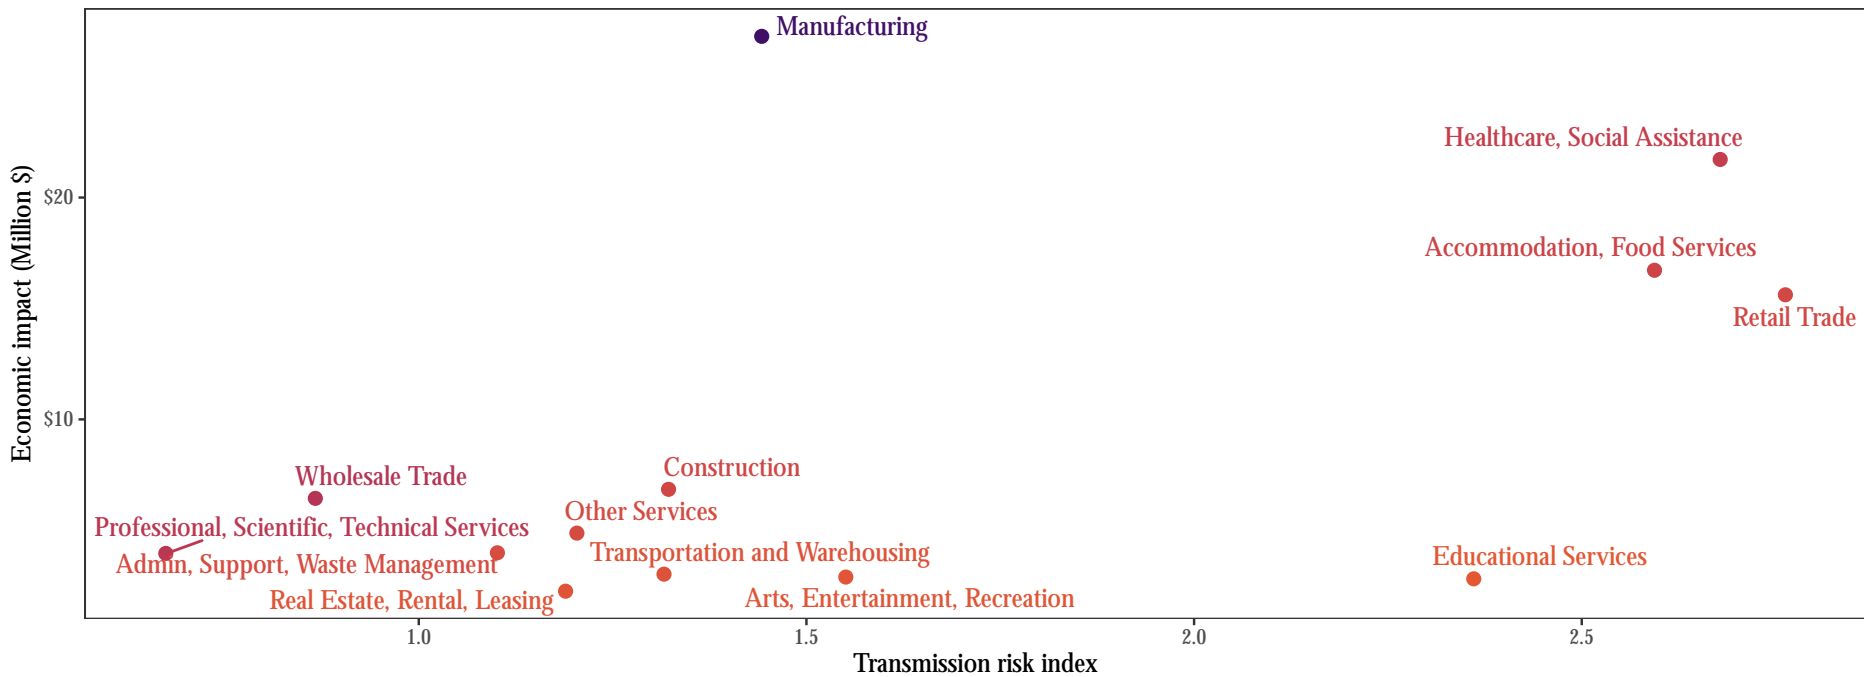

# Michigan

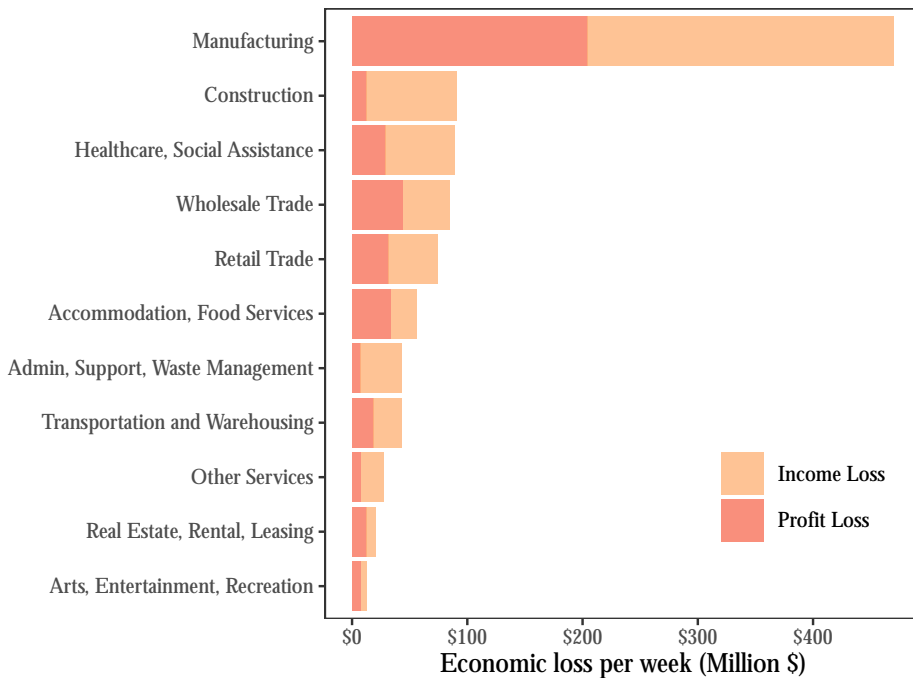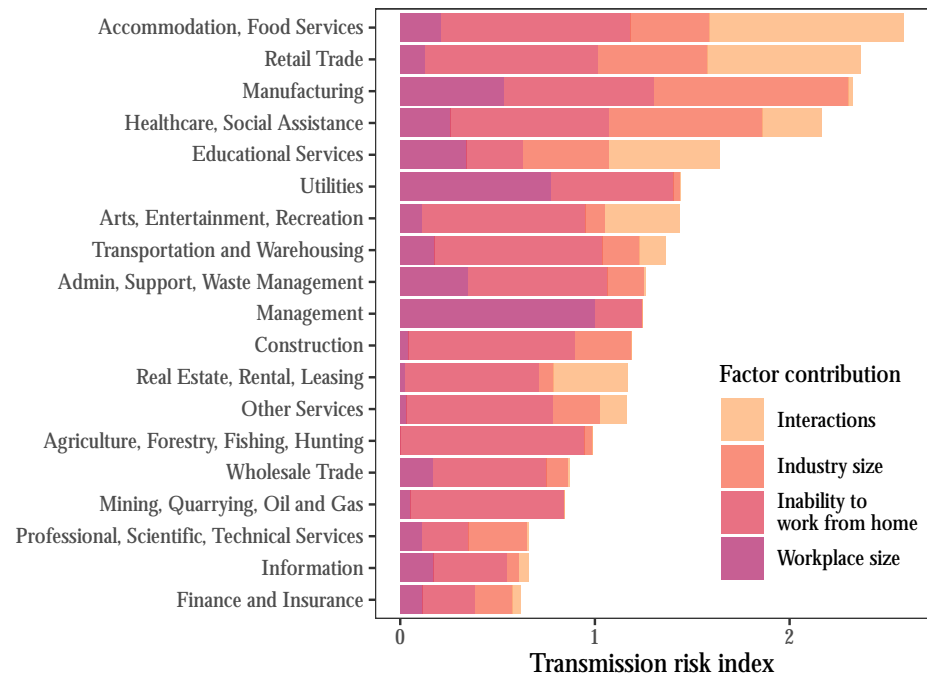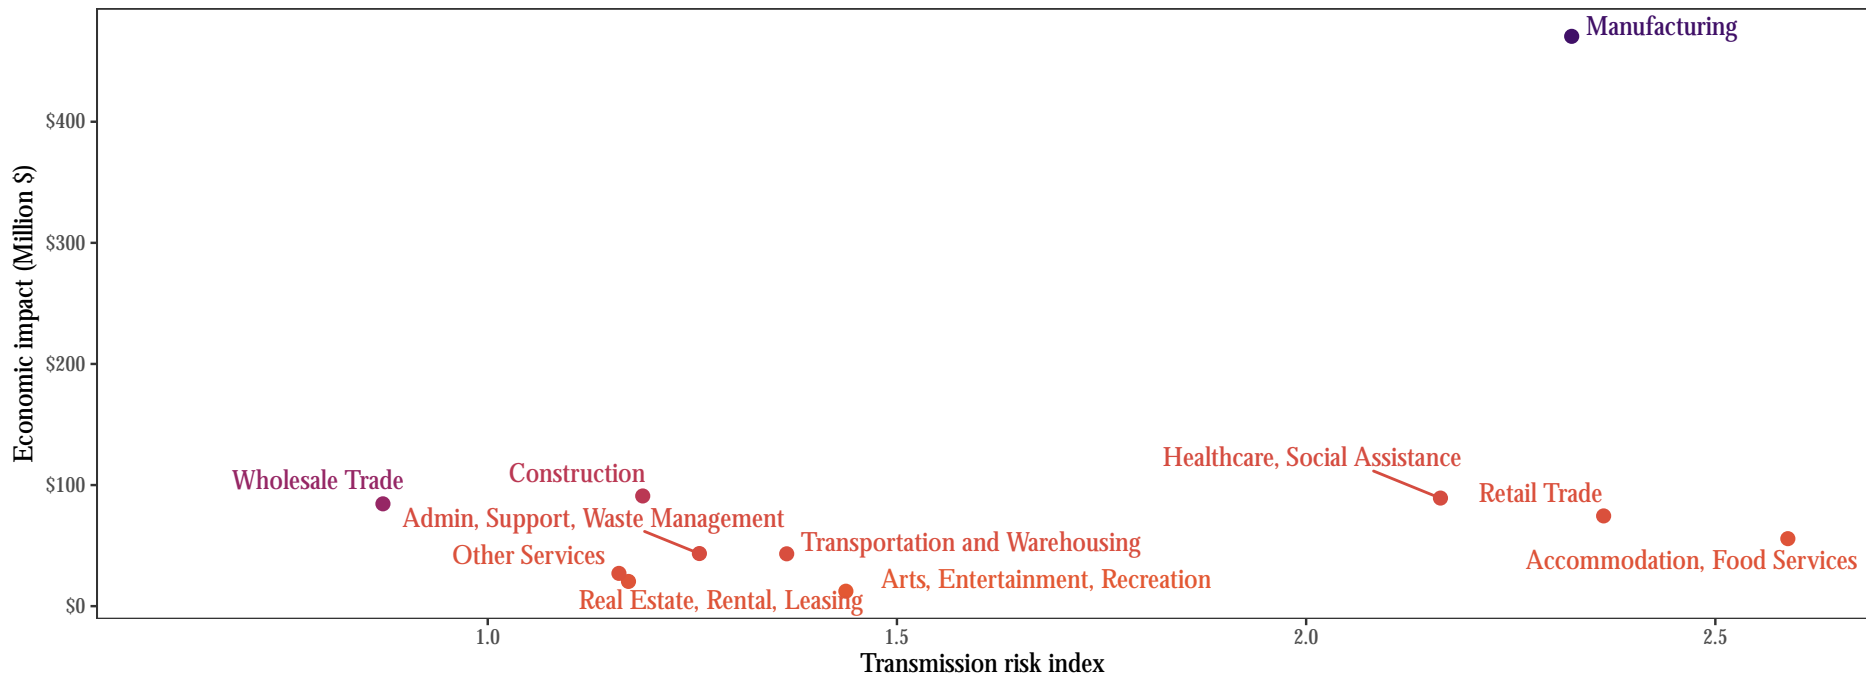

# Minnesota

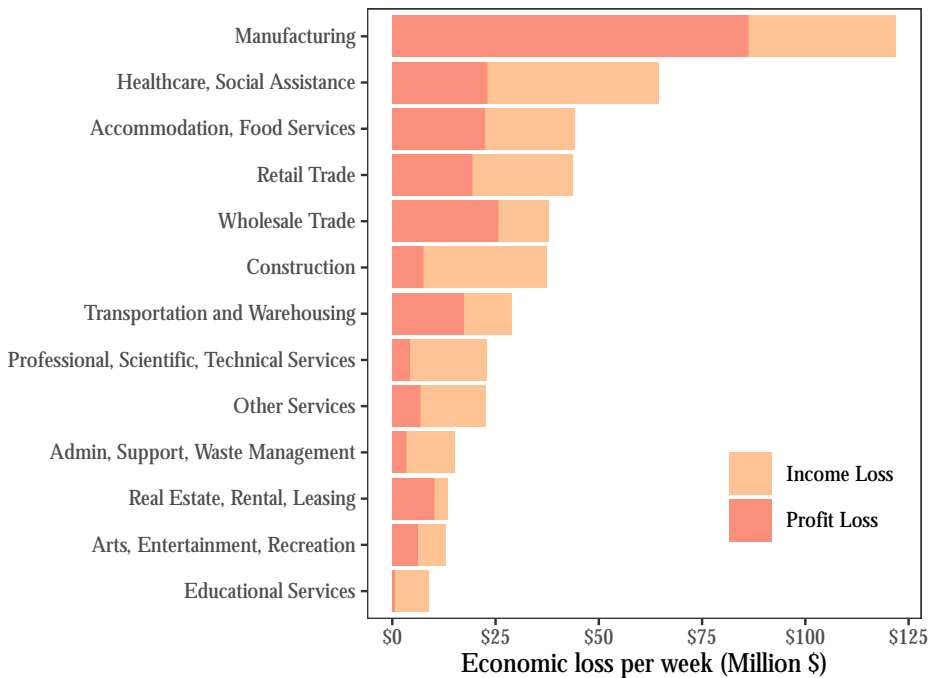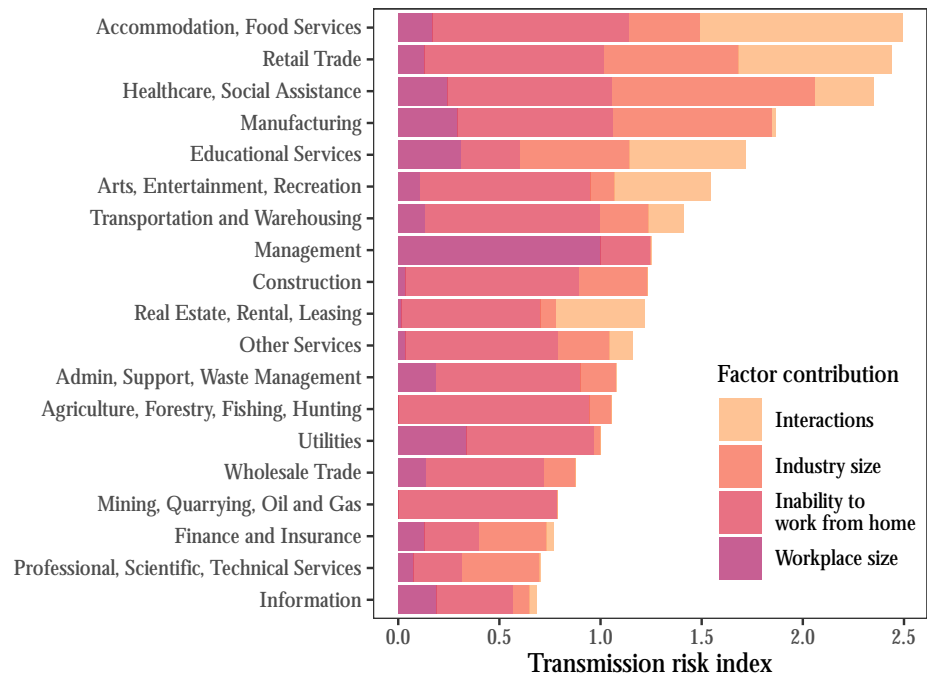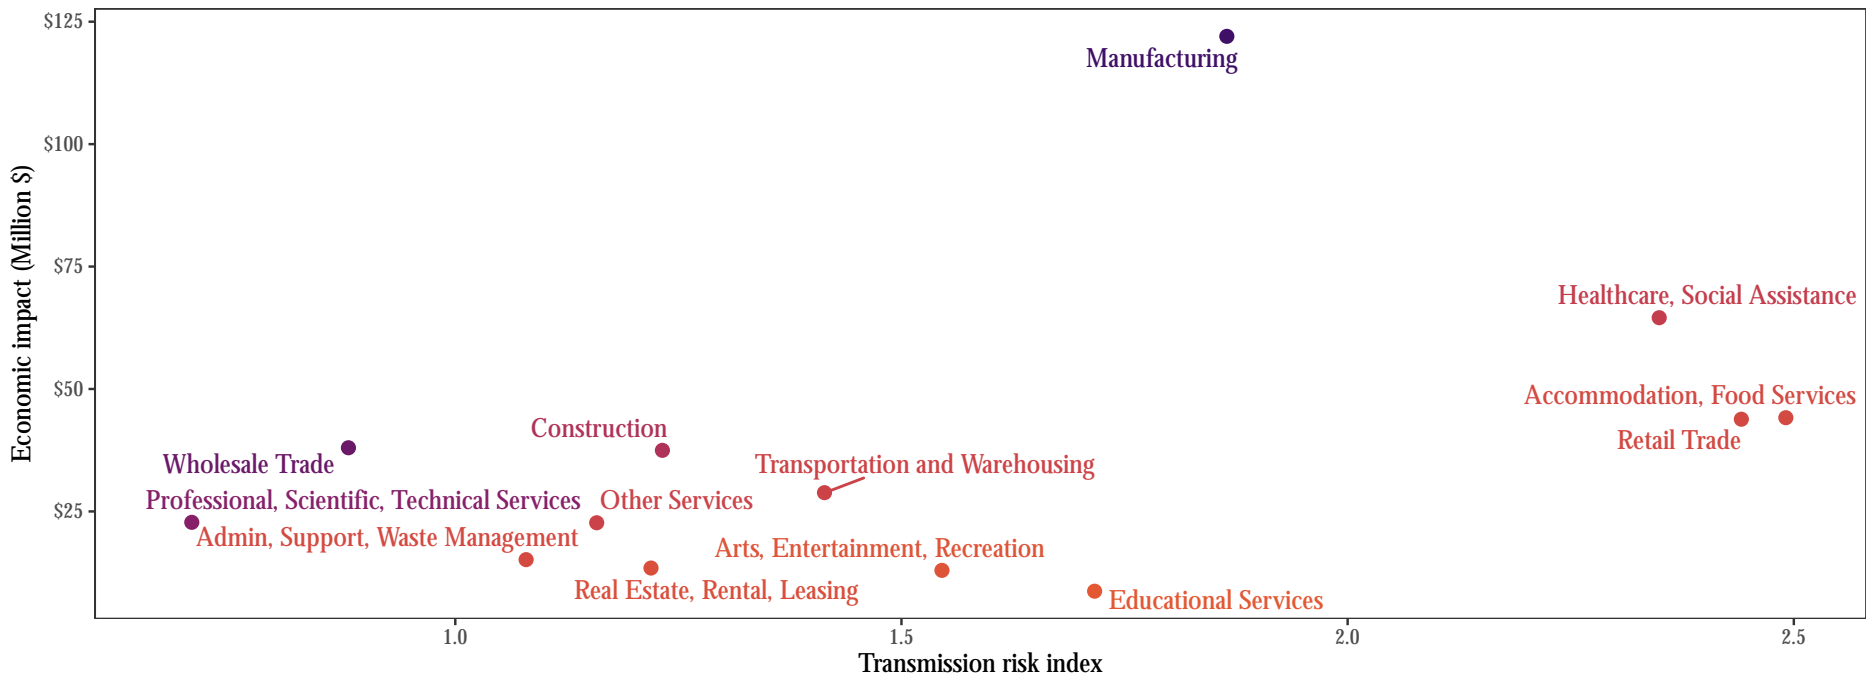



# Mississippi

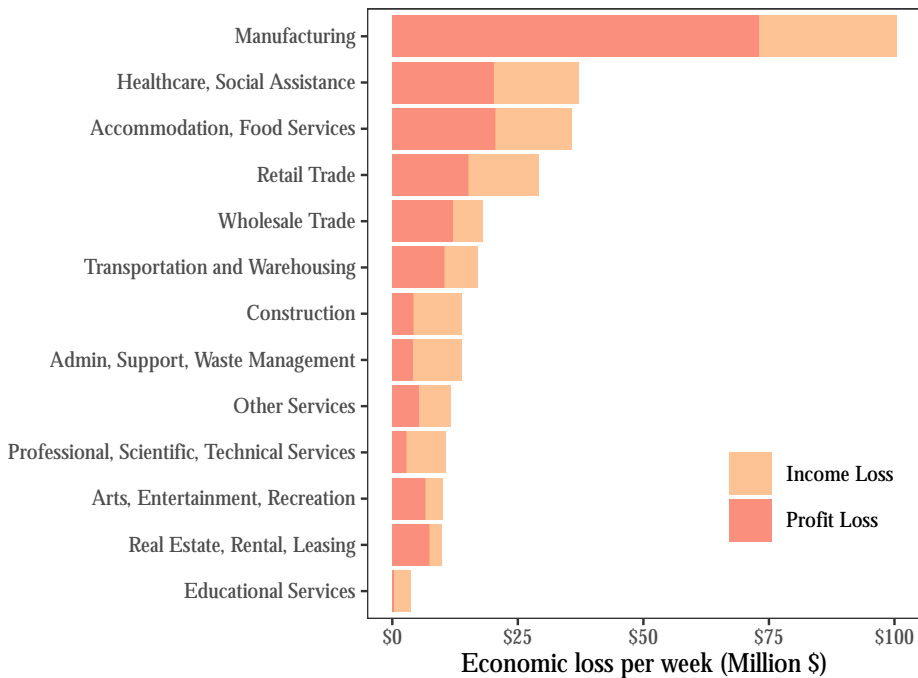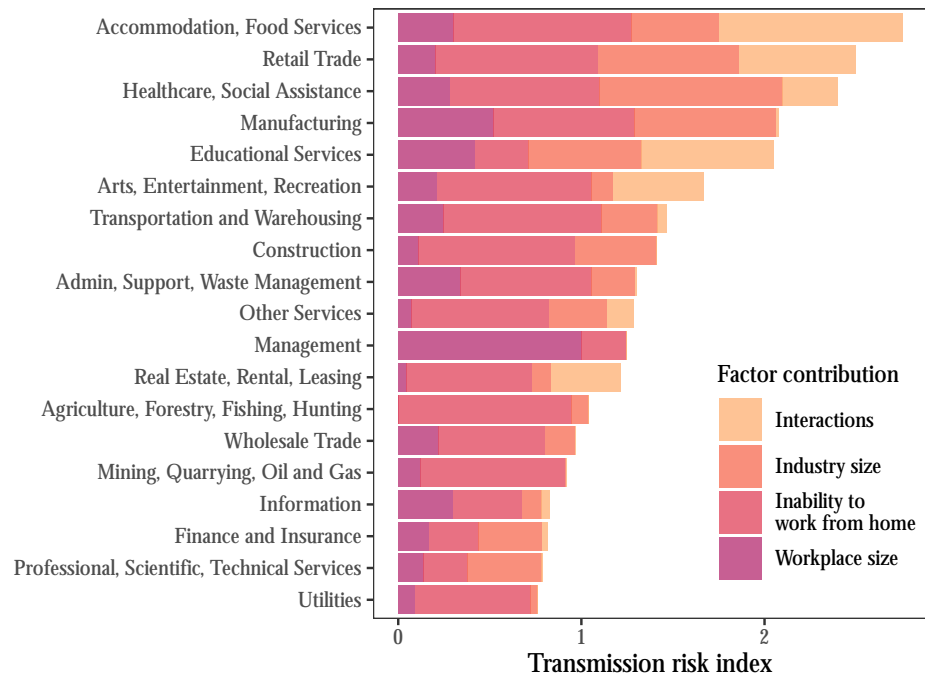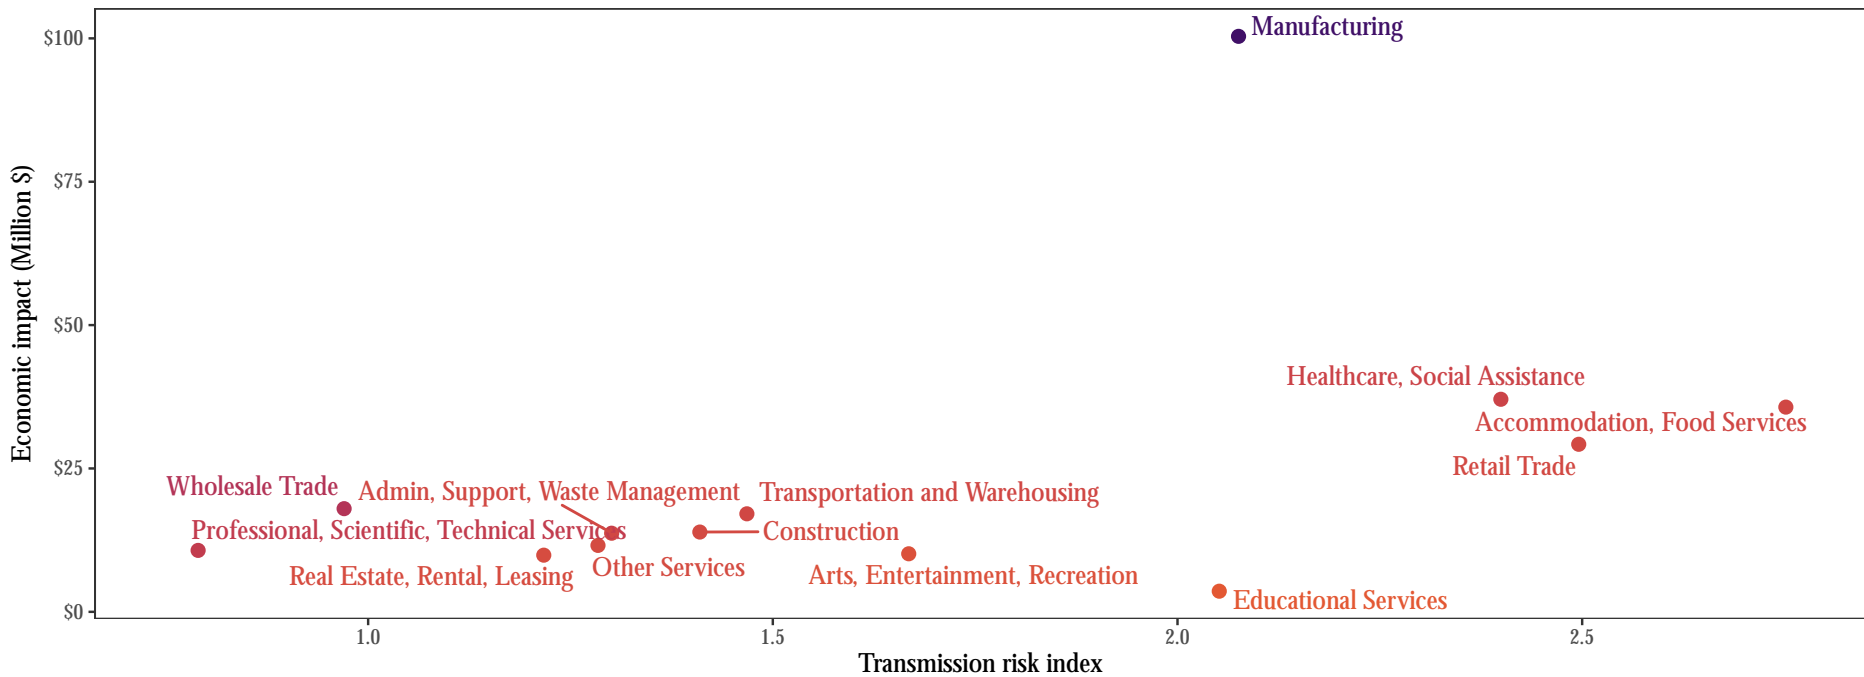

# Missouri

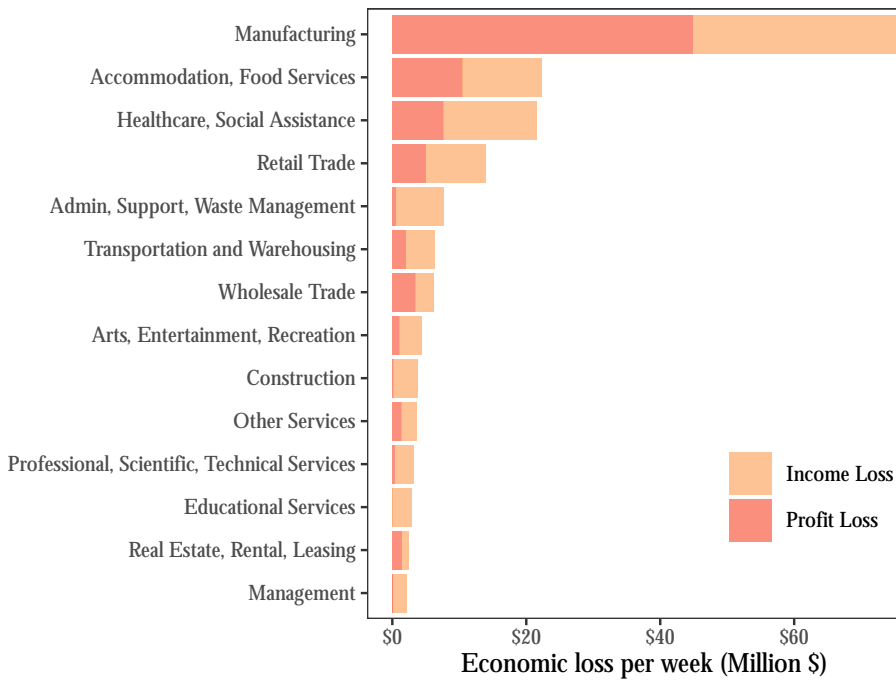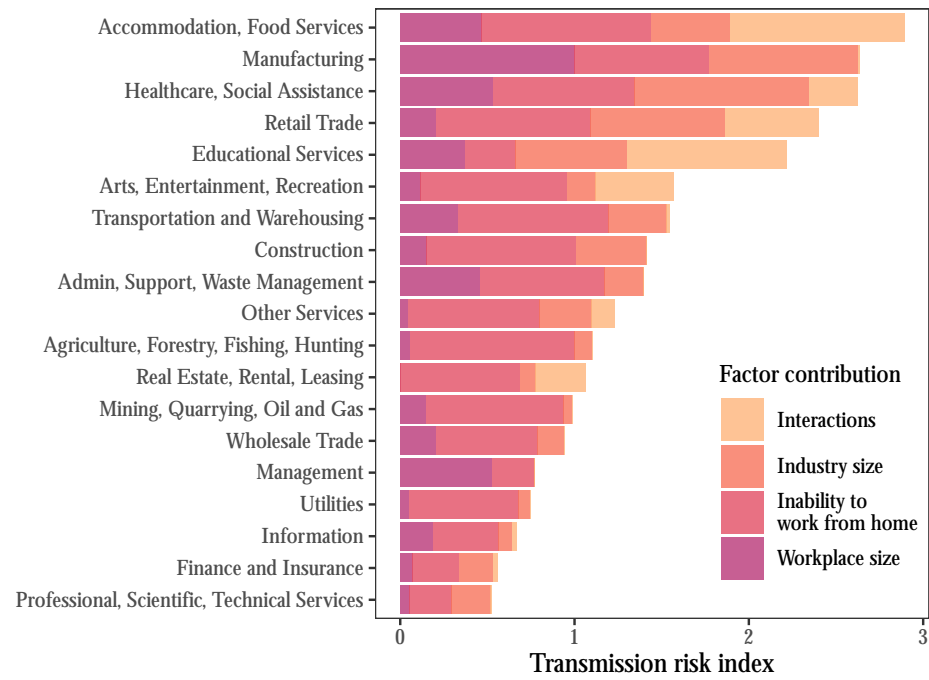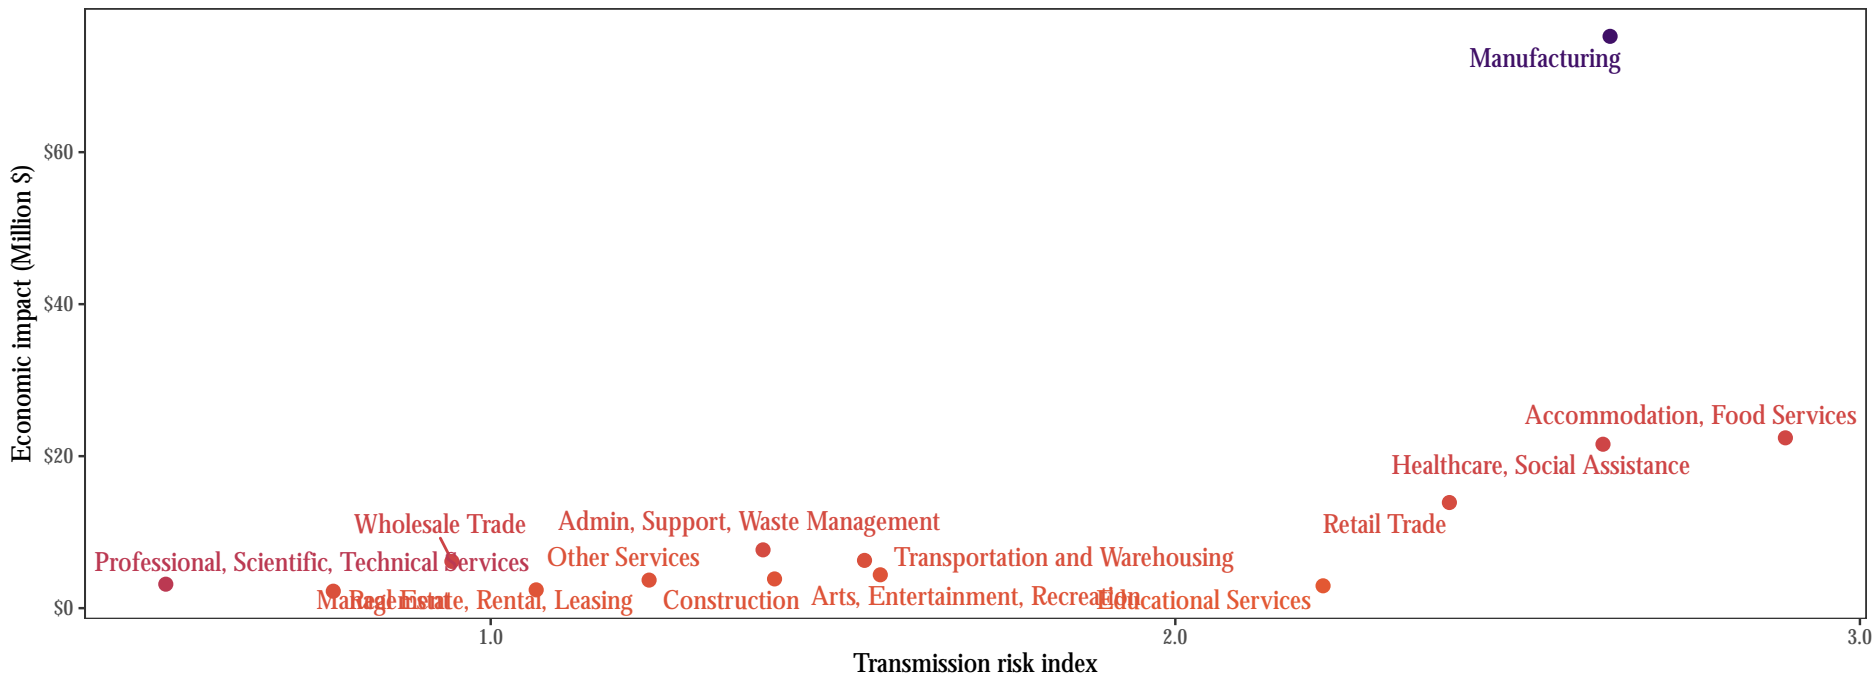

# Montana

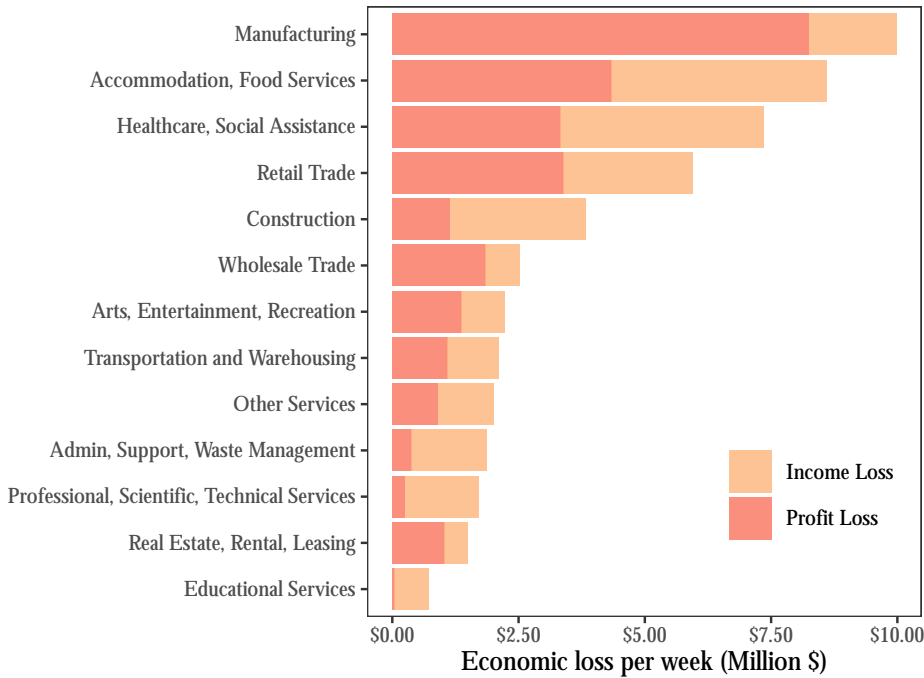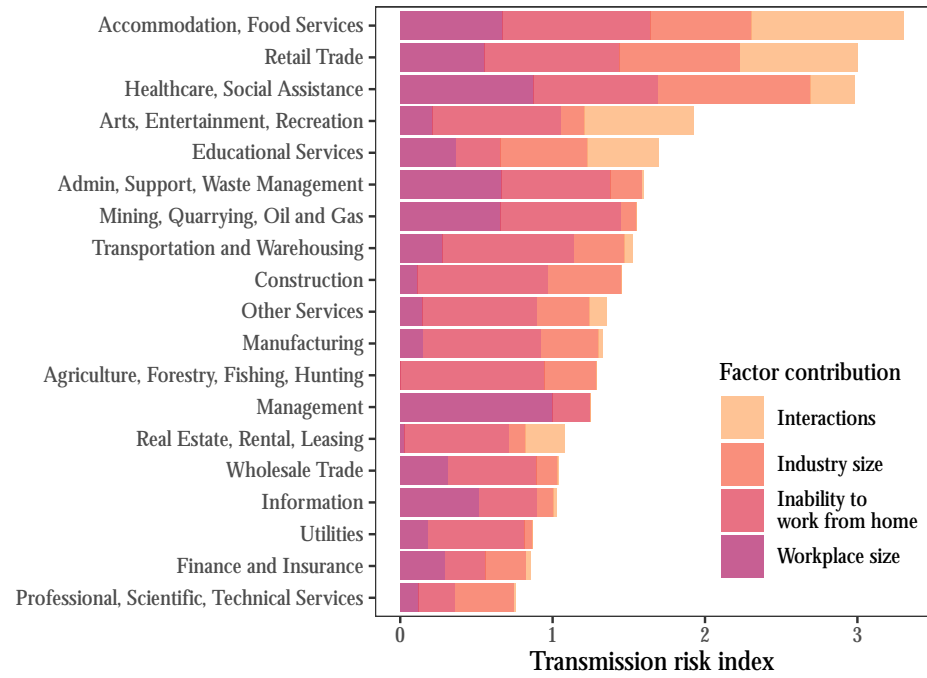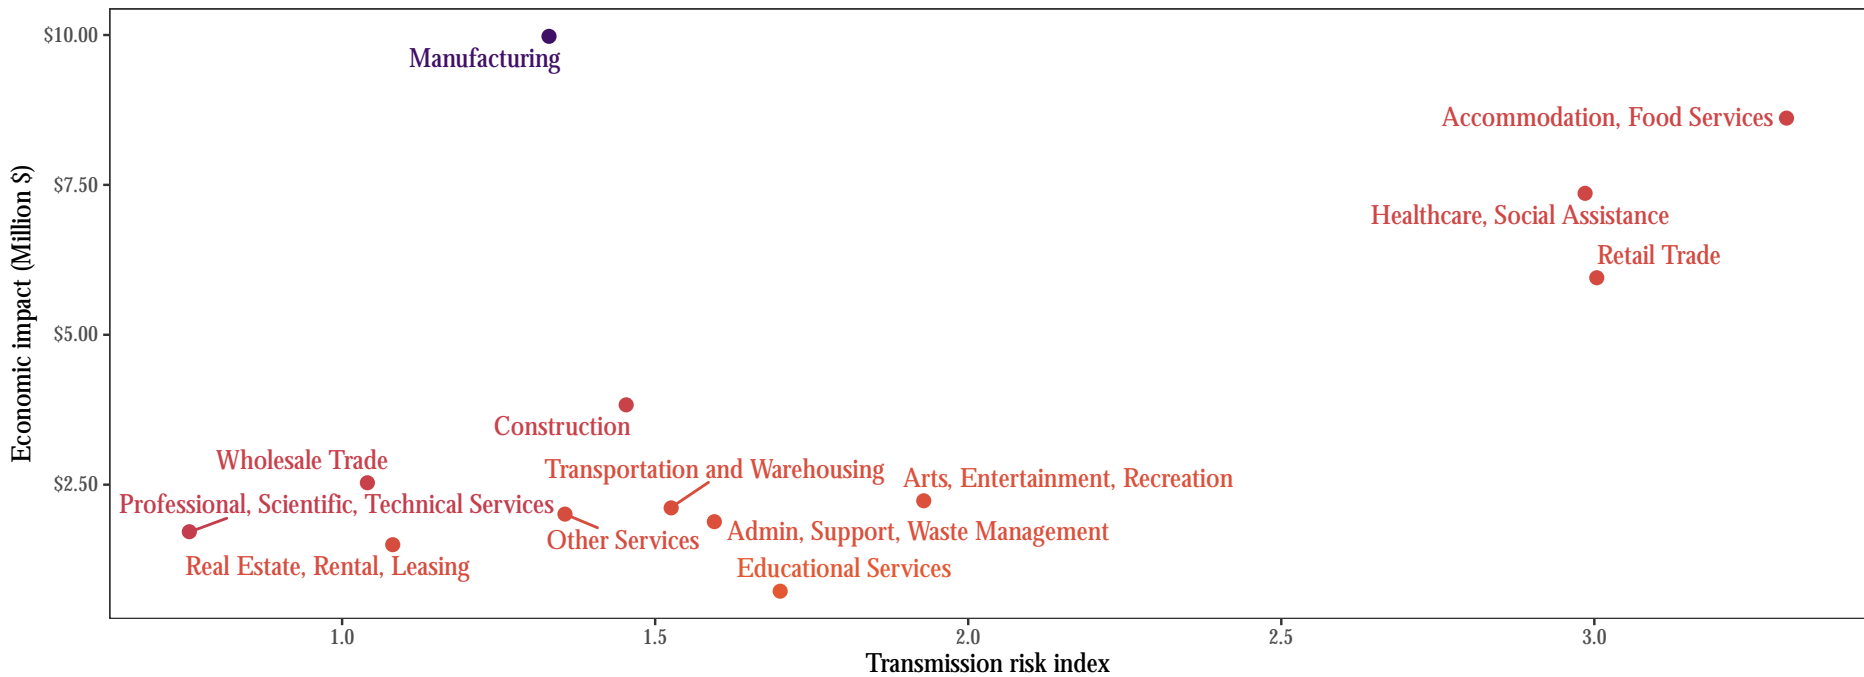

# Nebraska

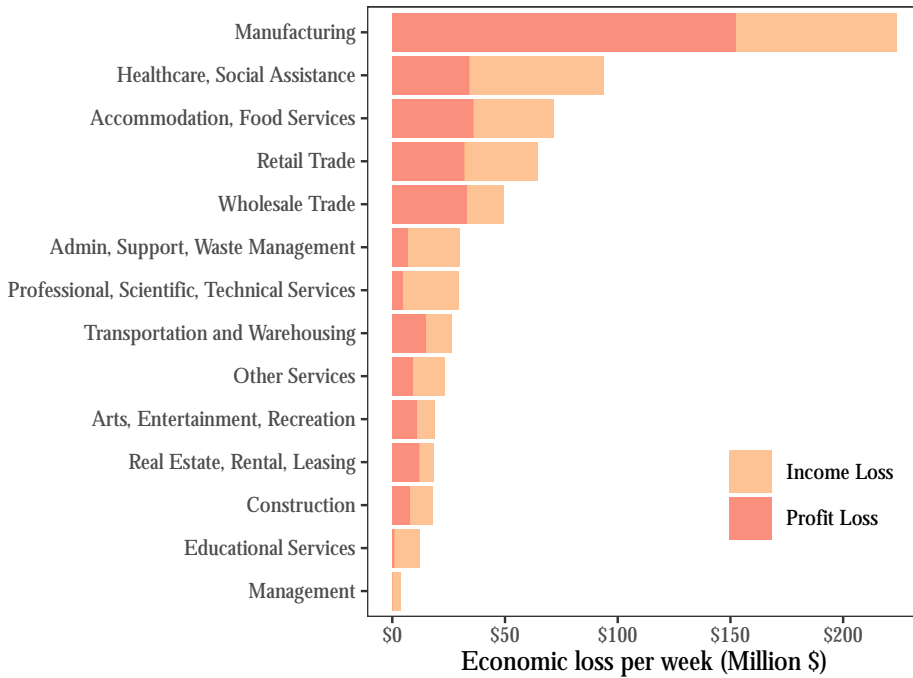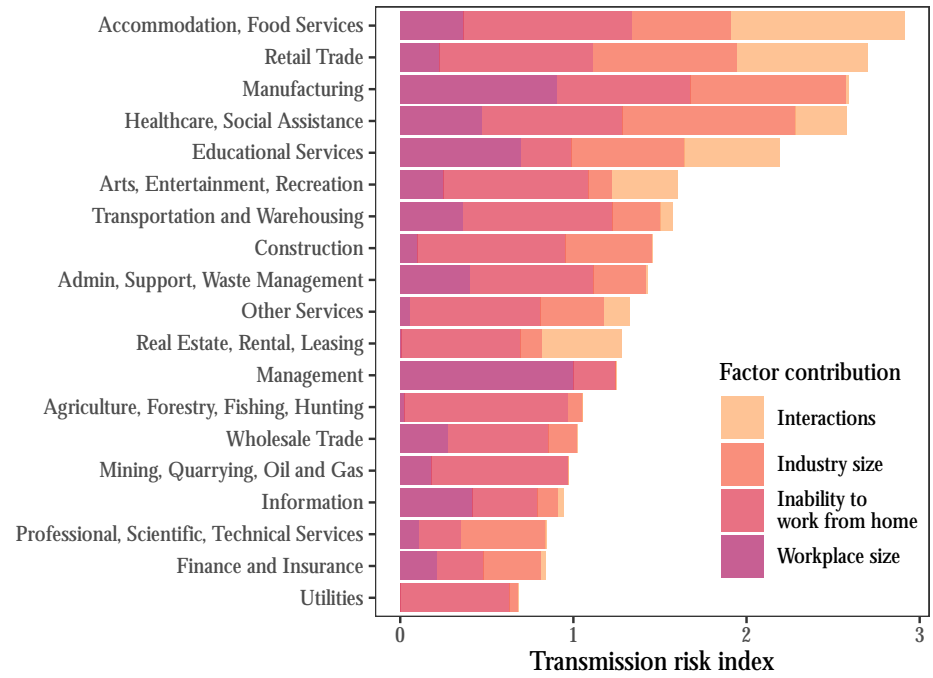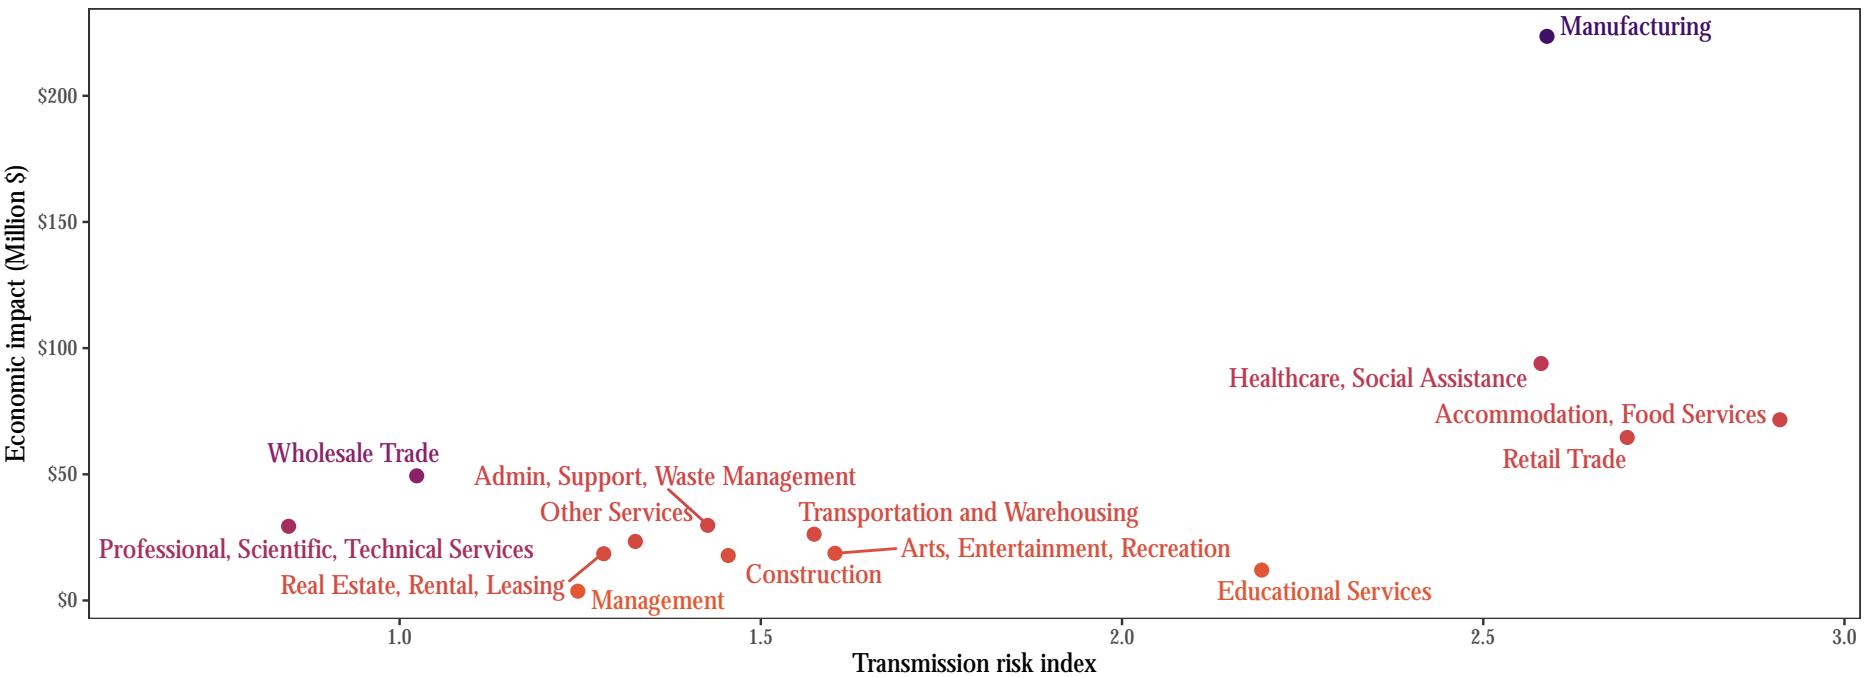

# Nevada

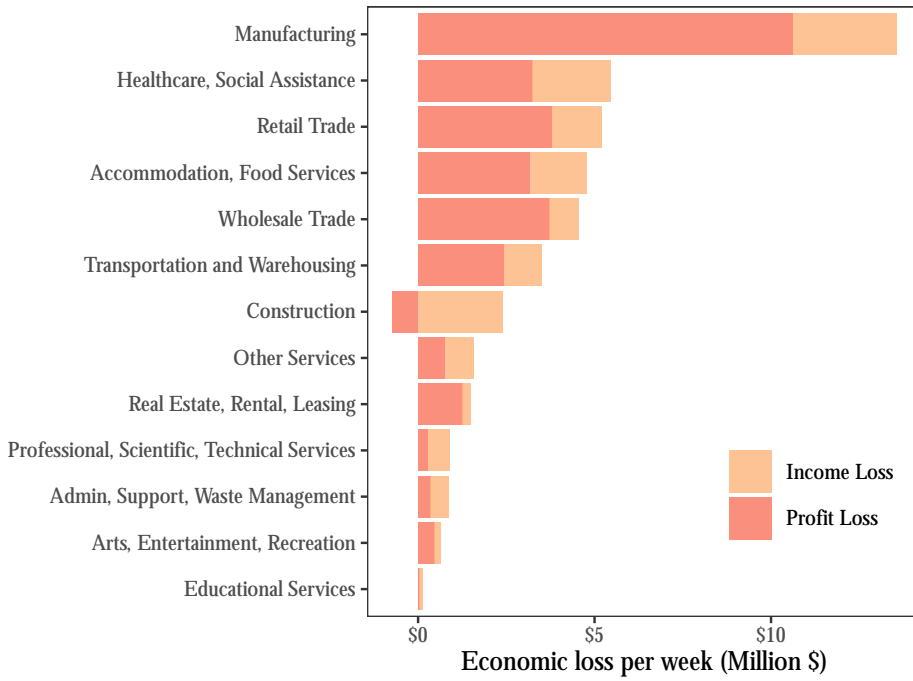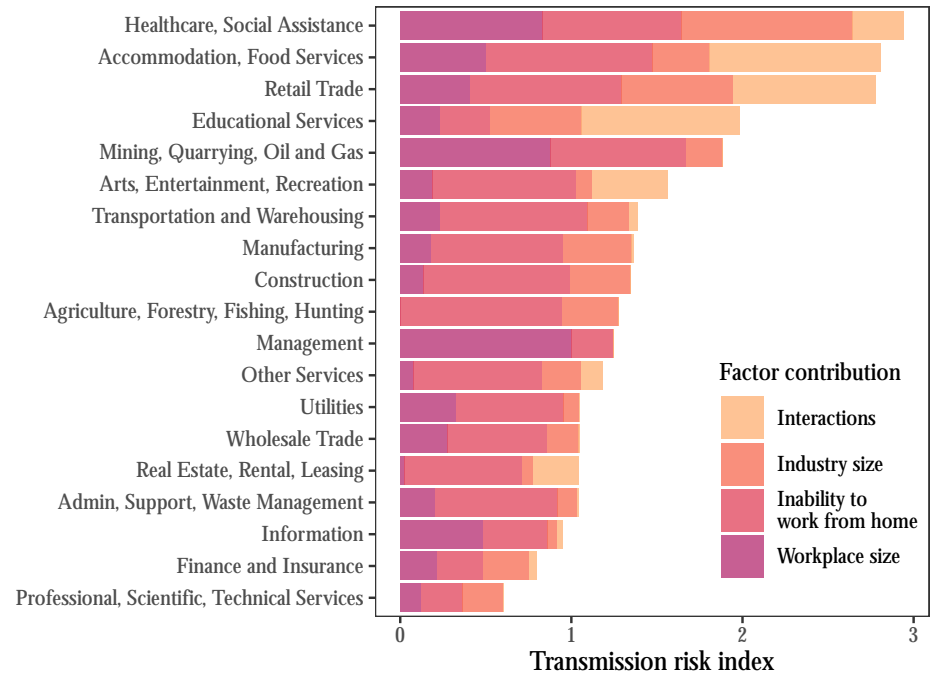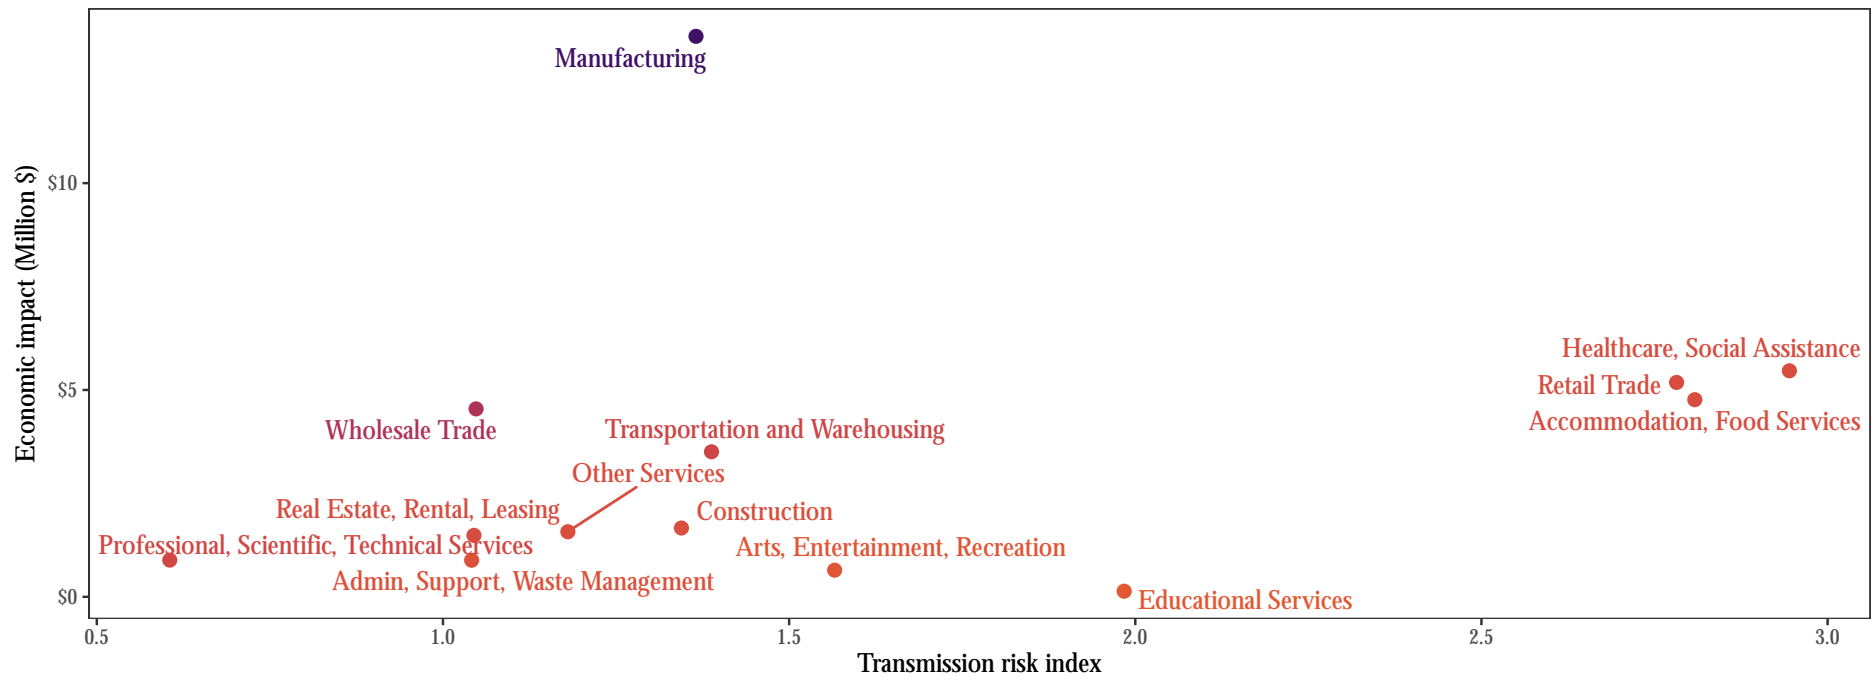

# New Hampshire

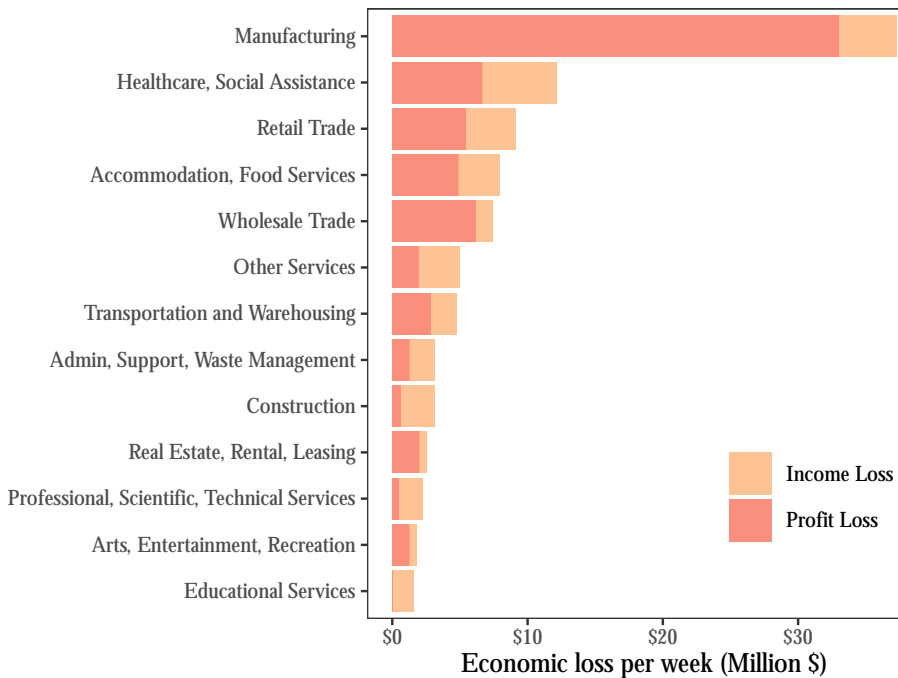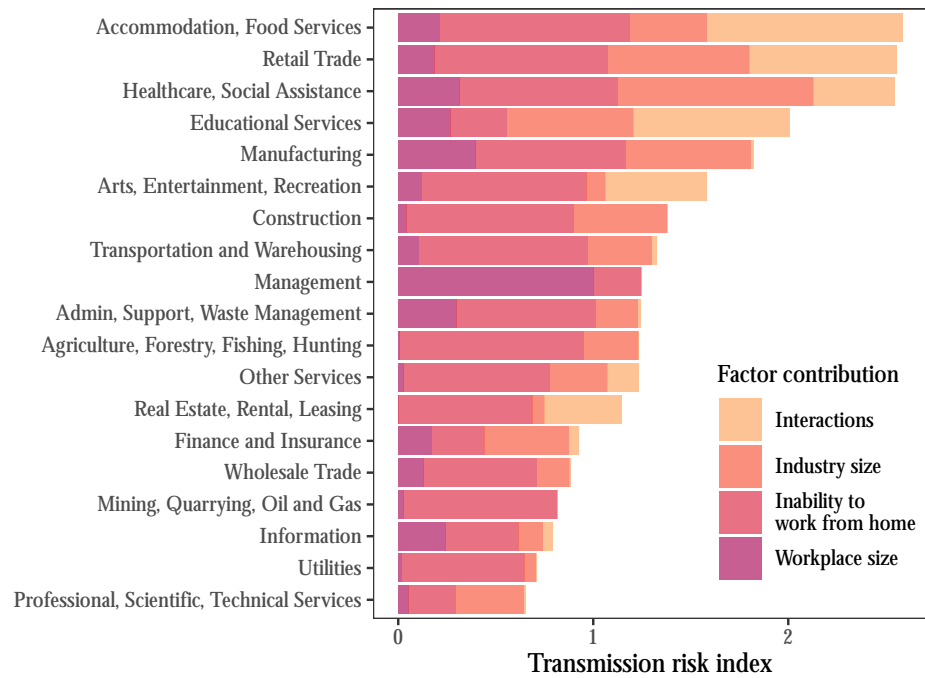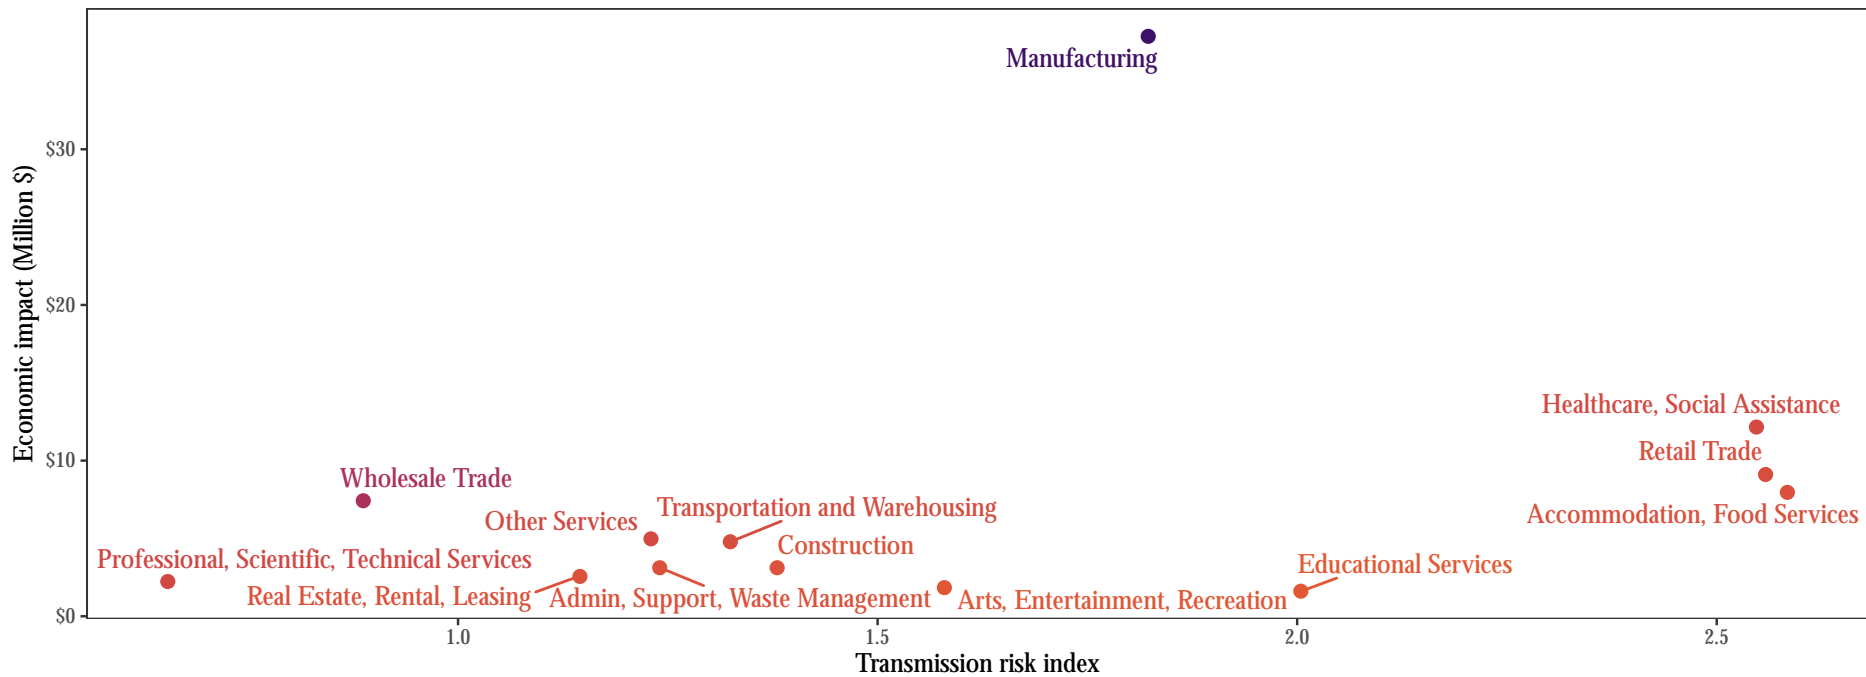

# New Jersey

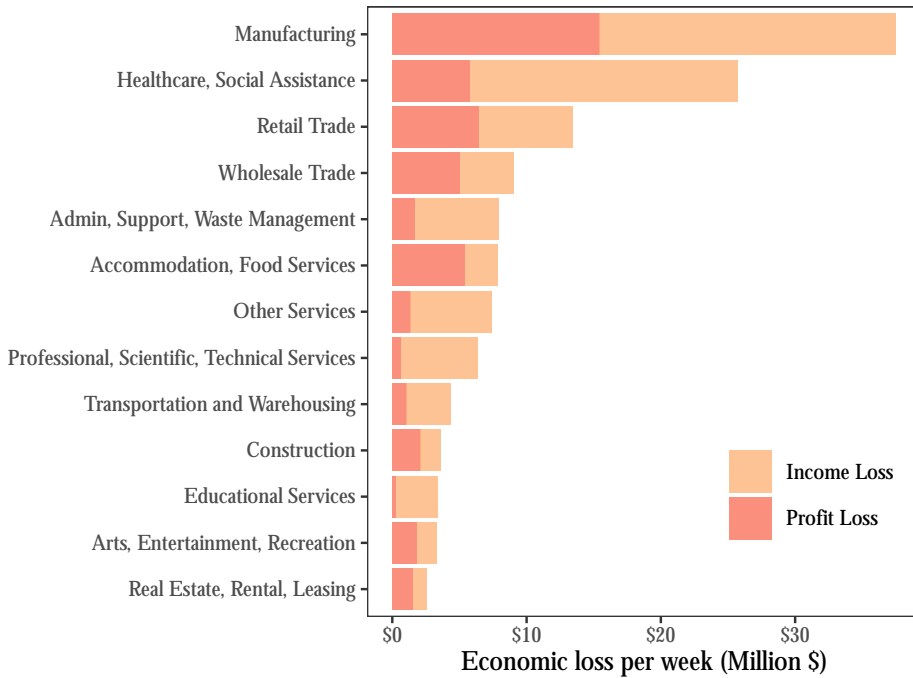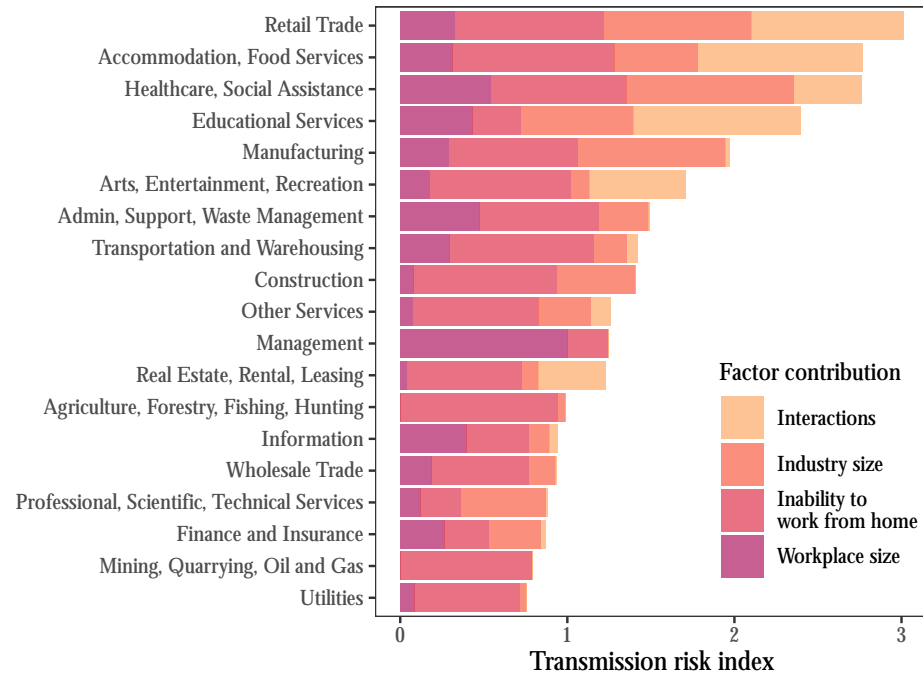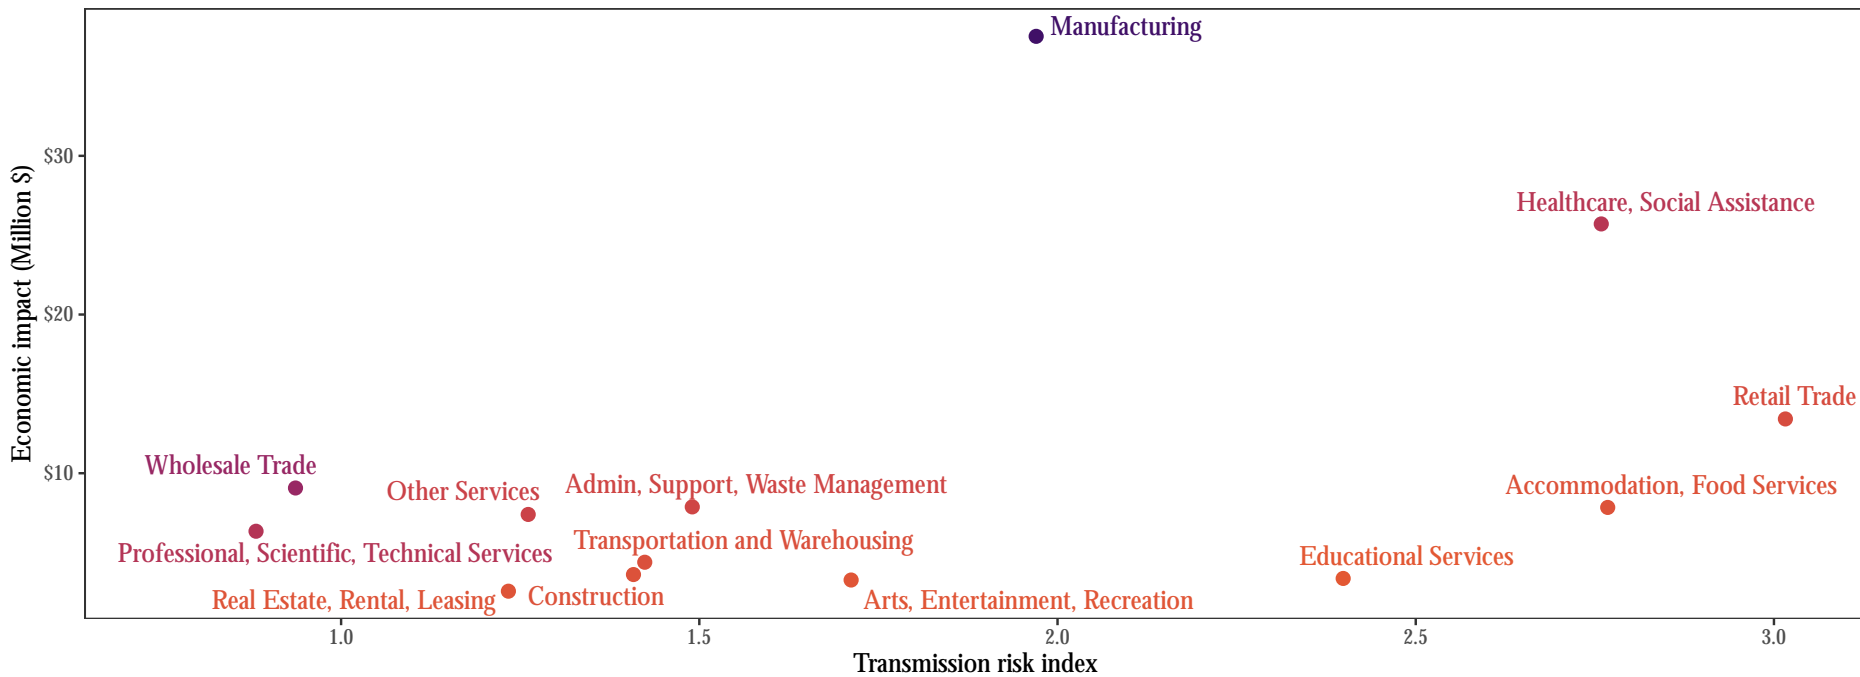

# New Mexico

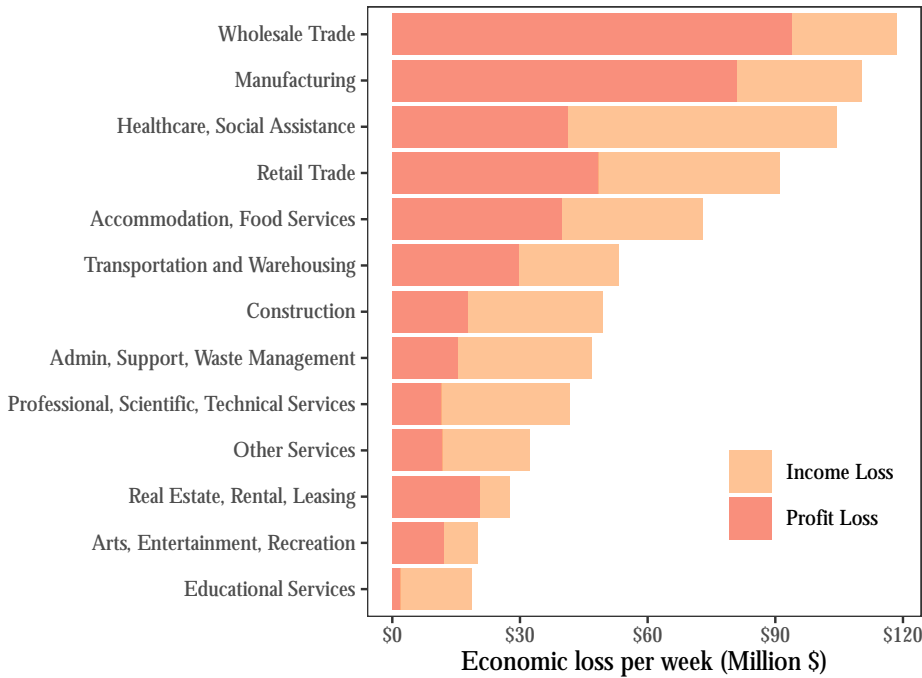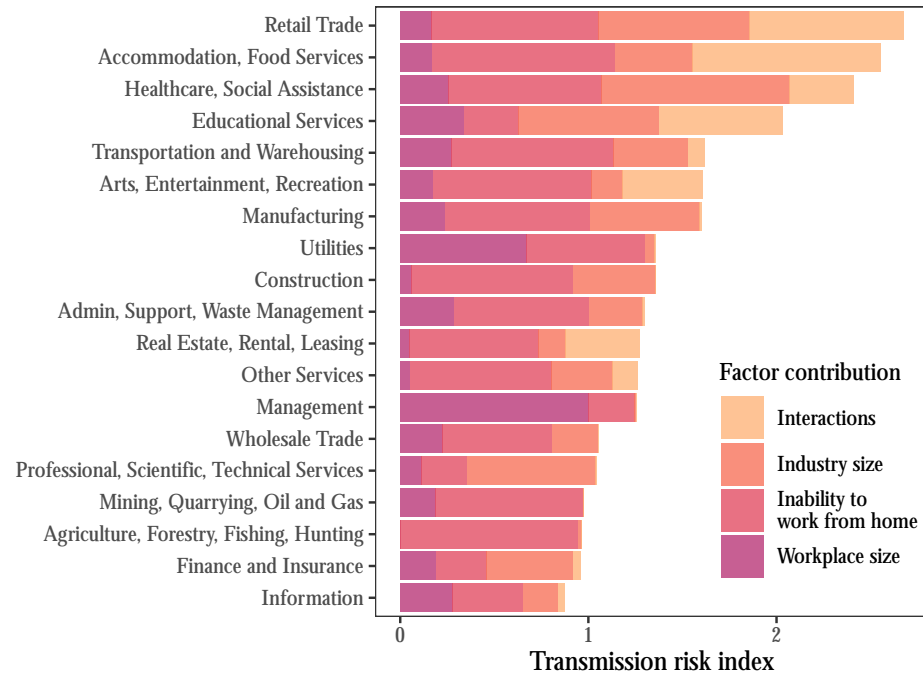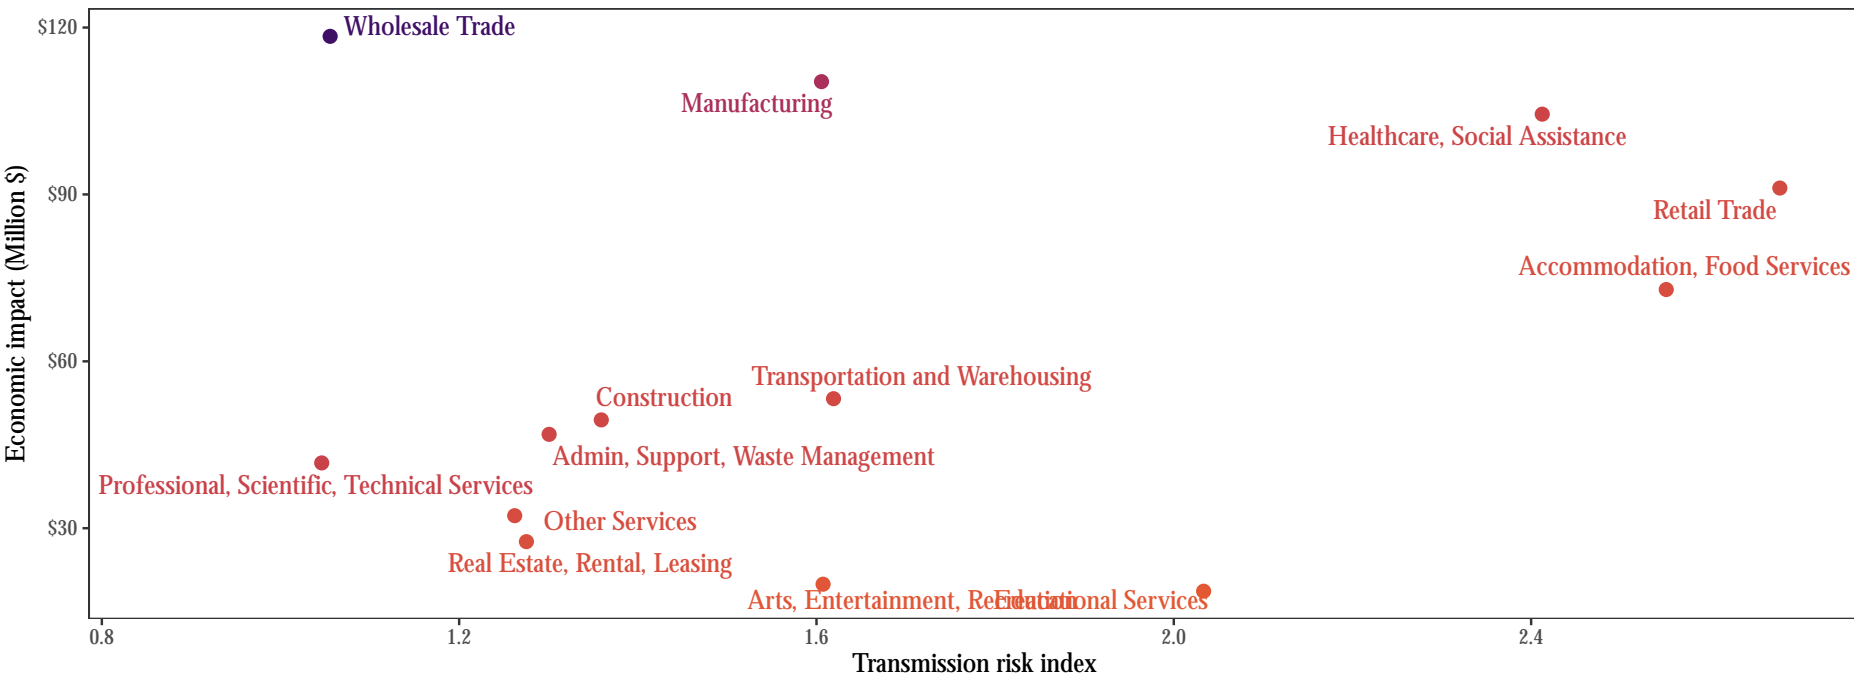



# New York

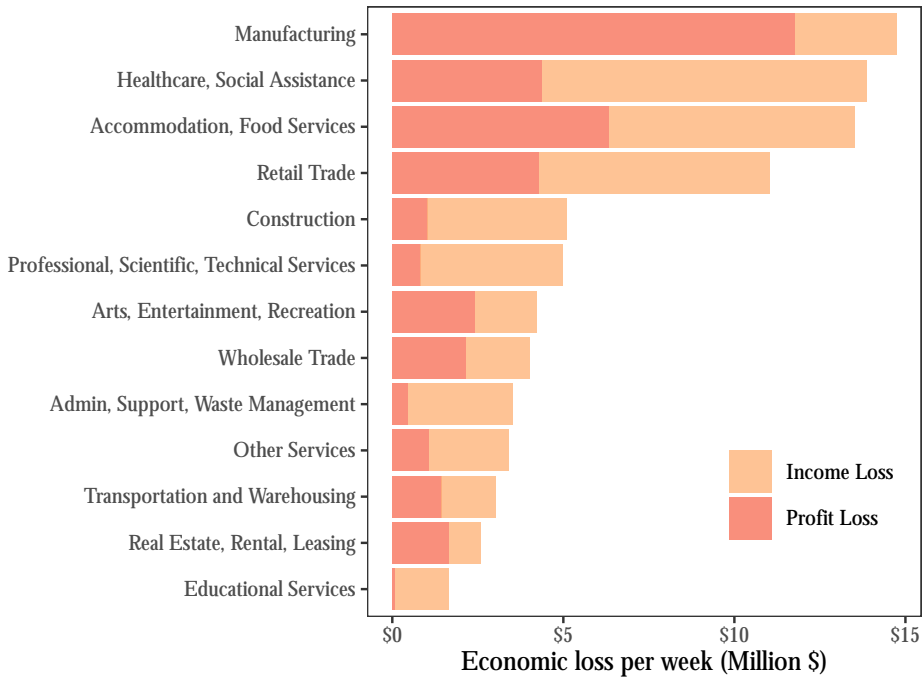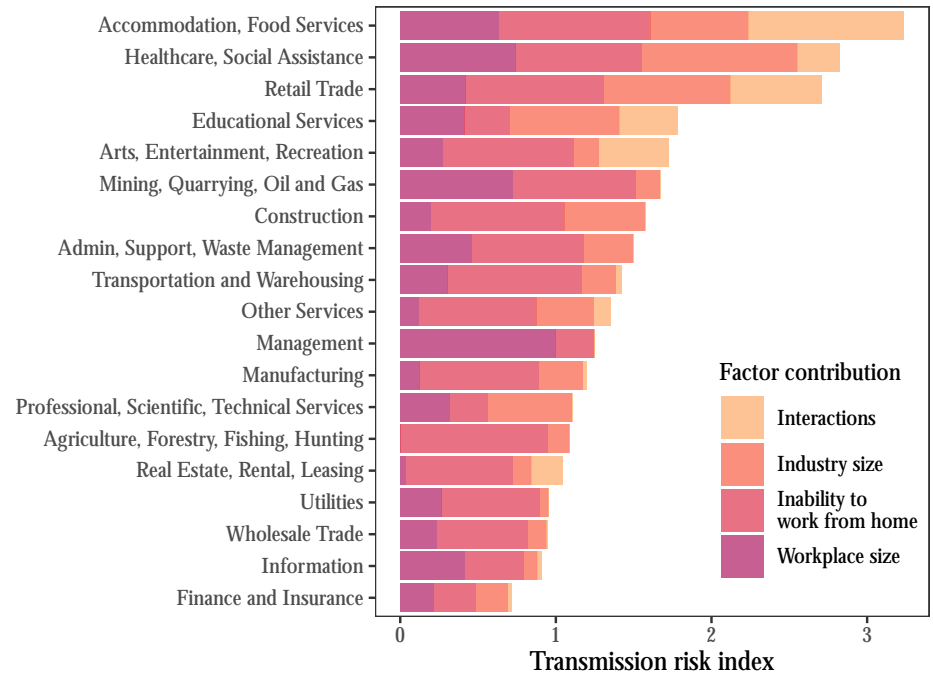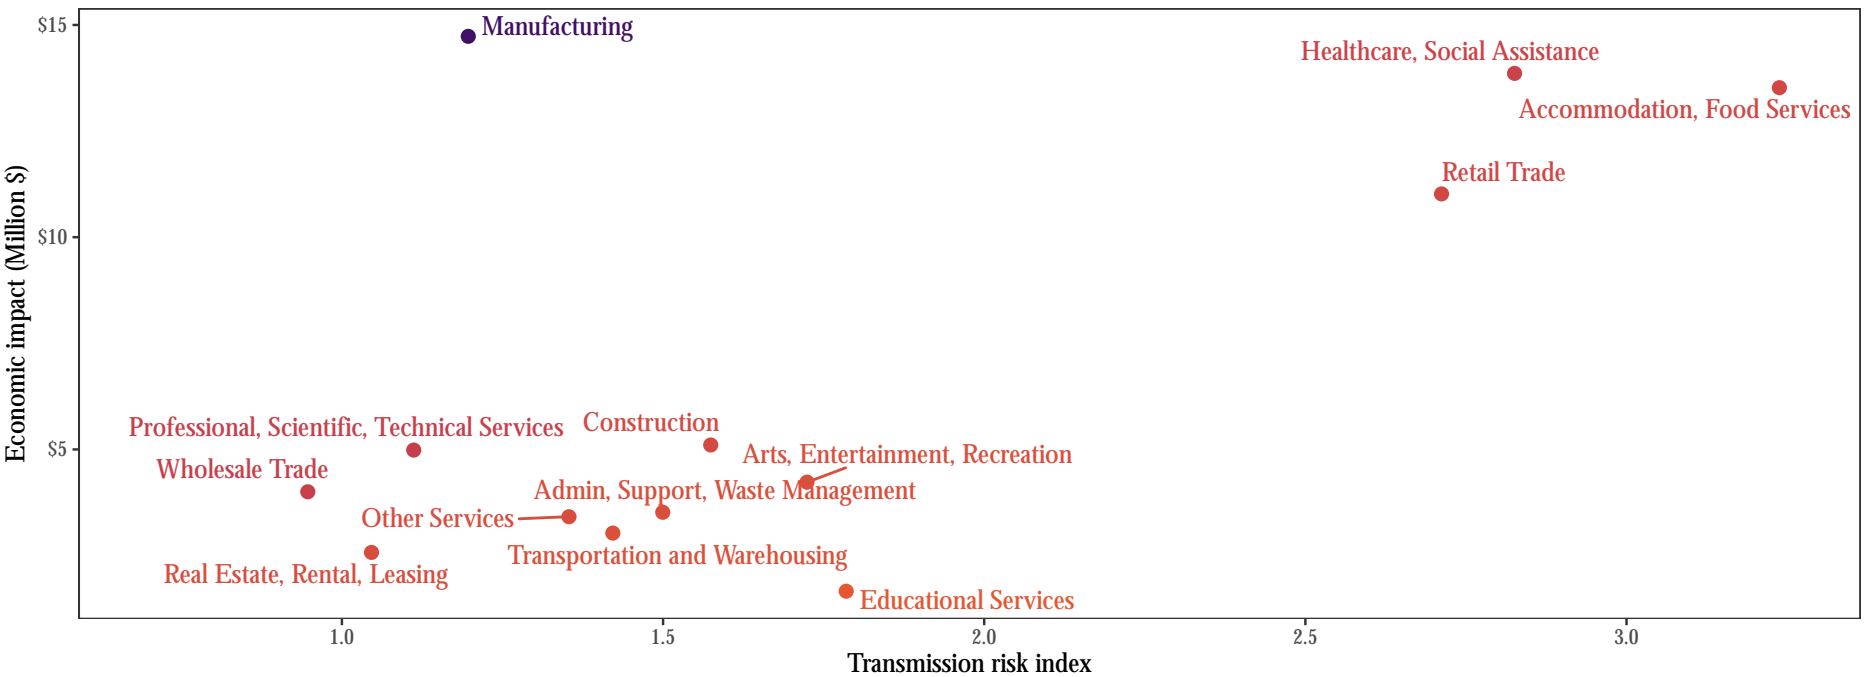

# North Carolina

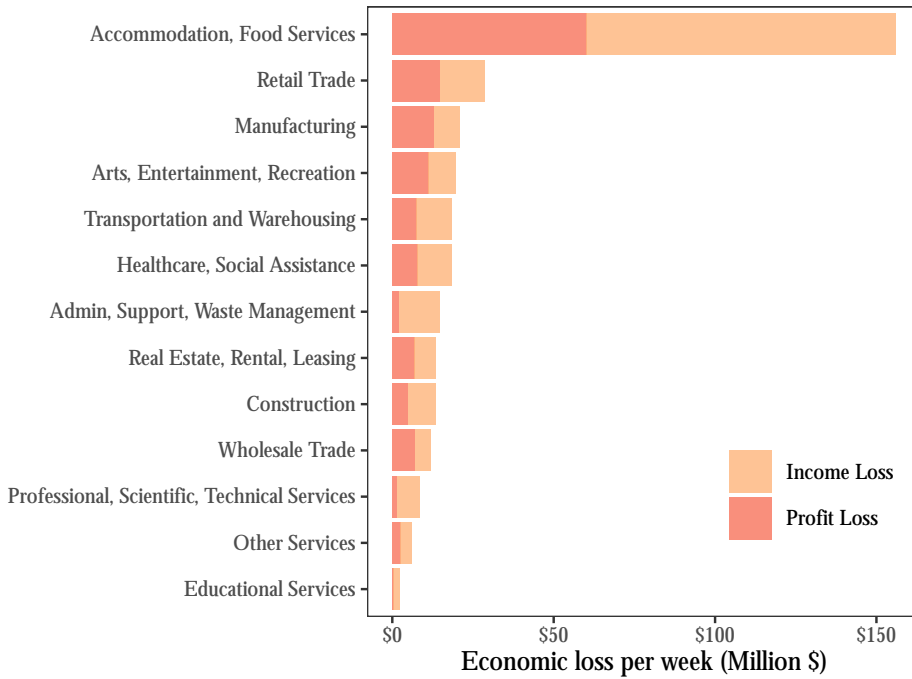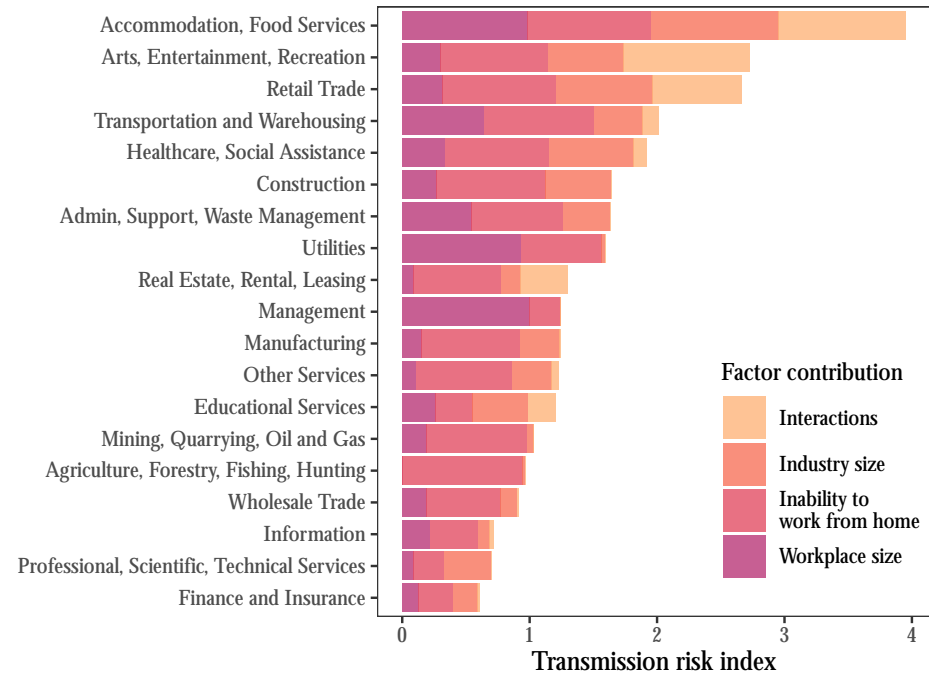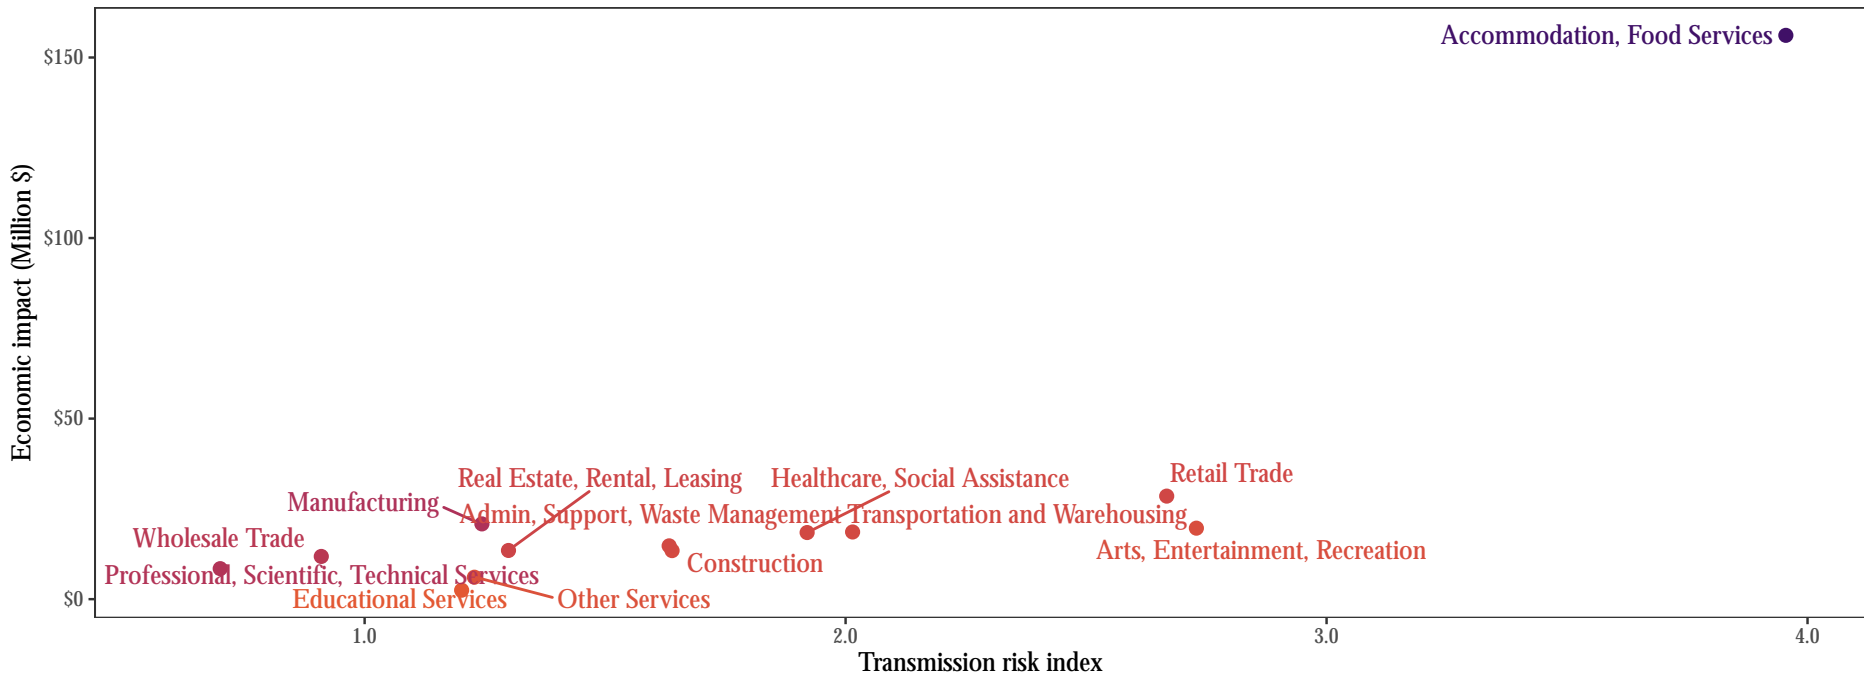

# North Dakota

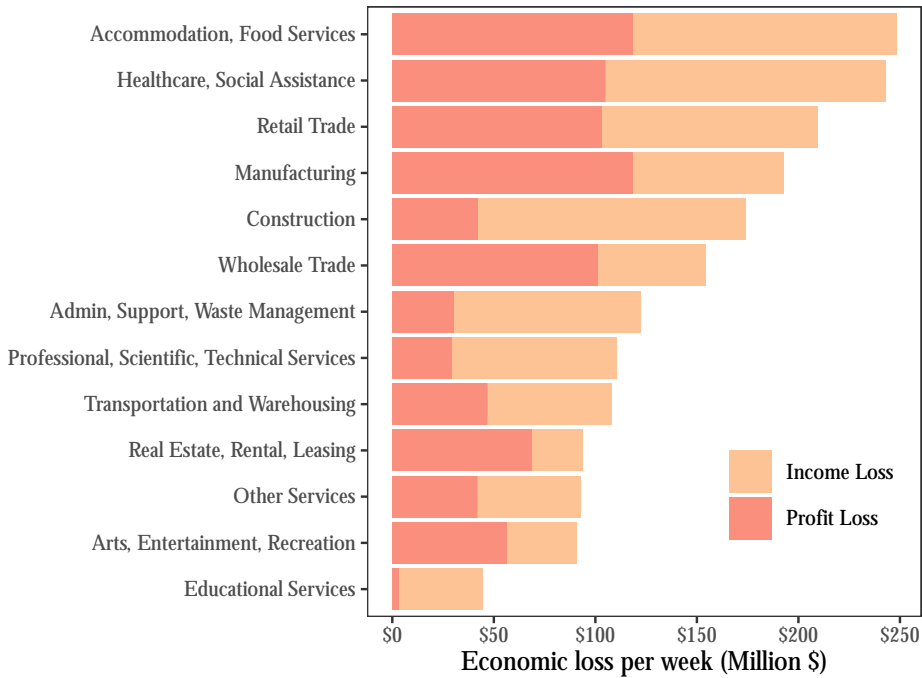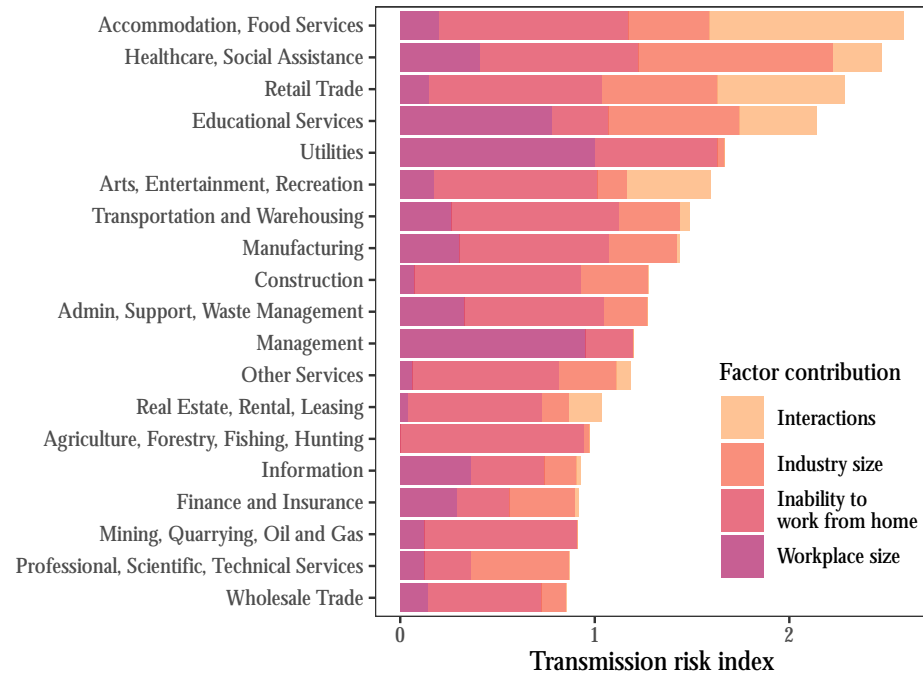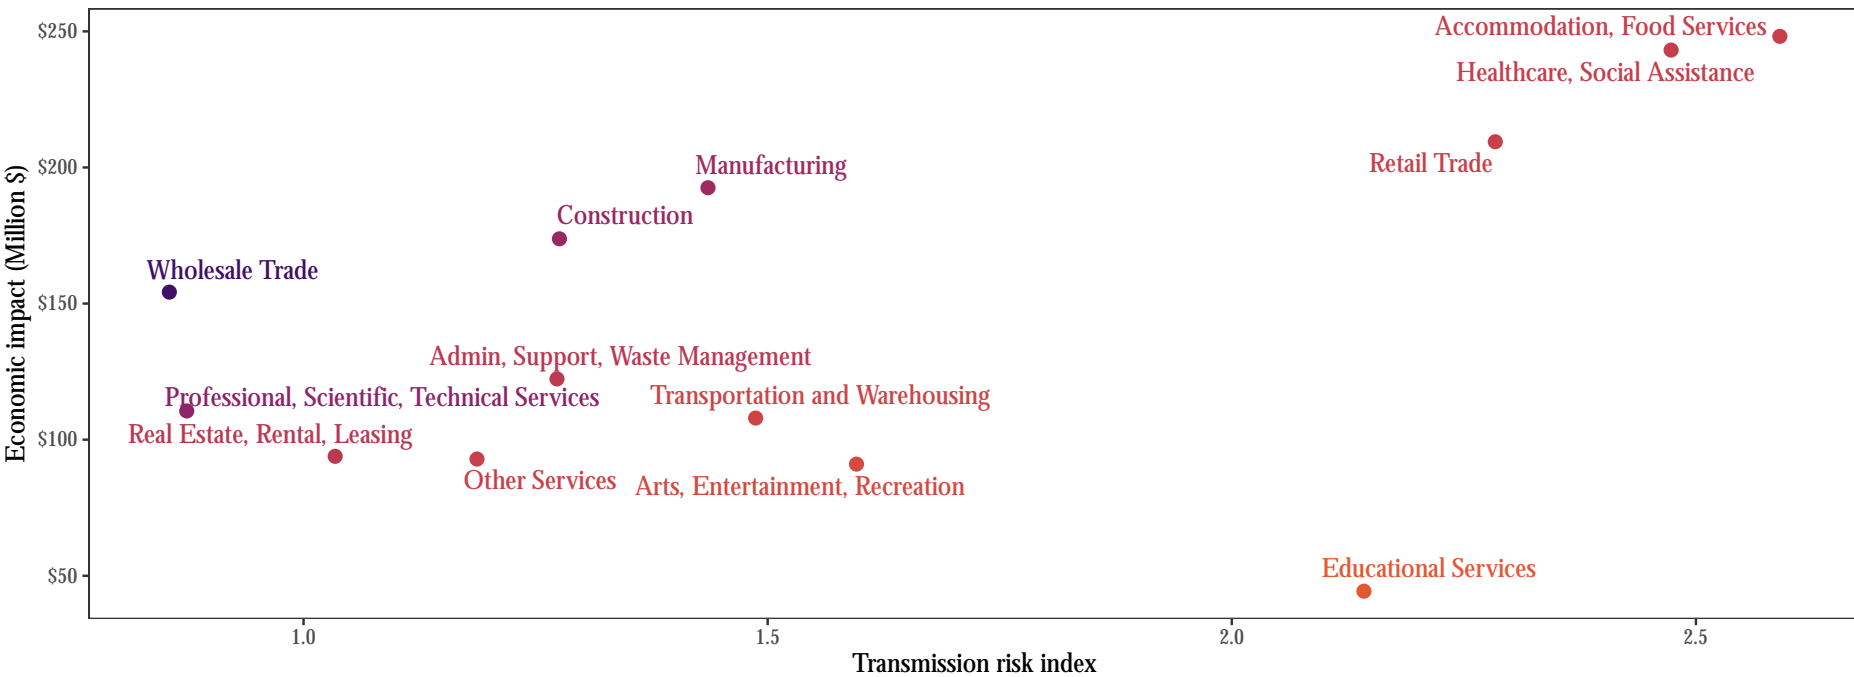

# Ohio

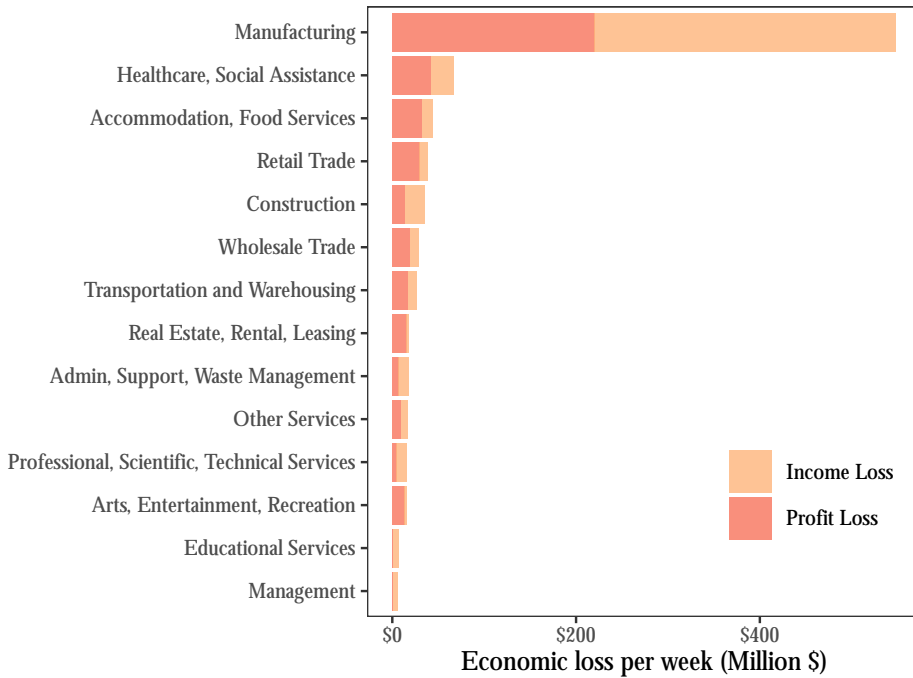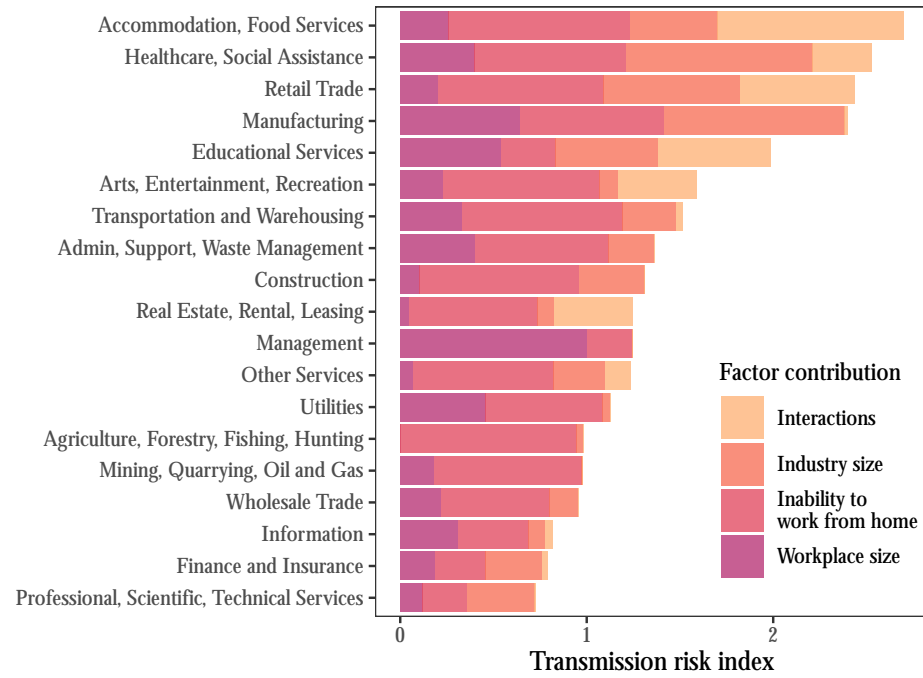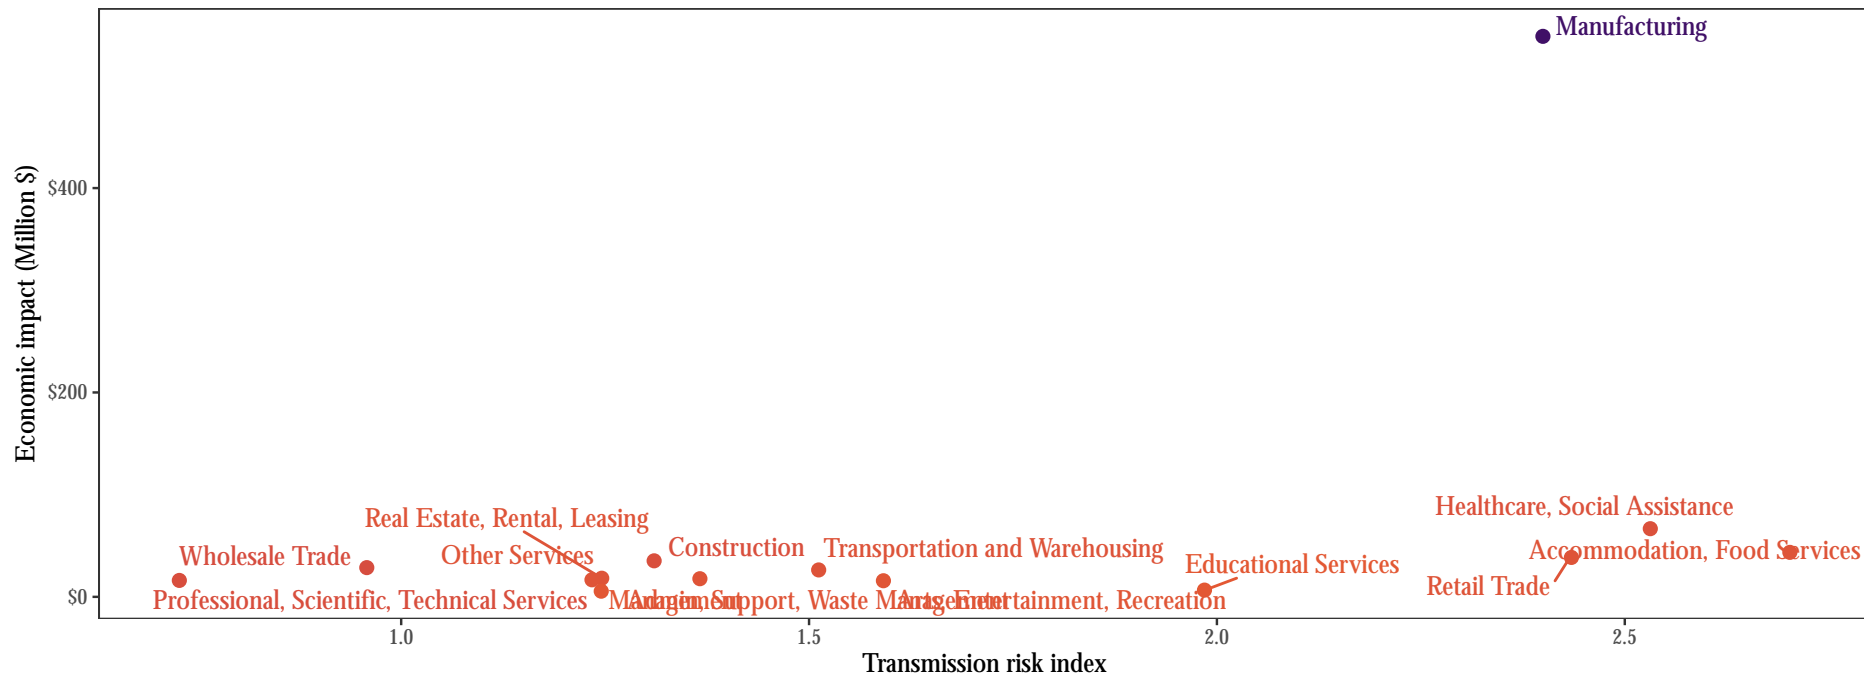

# Oklahoma

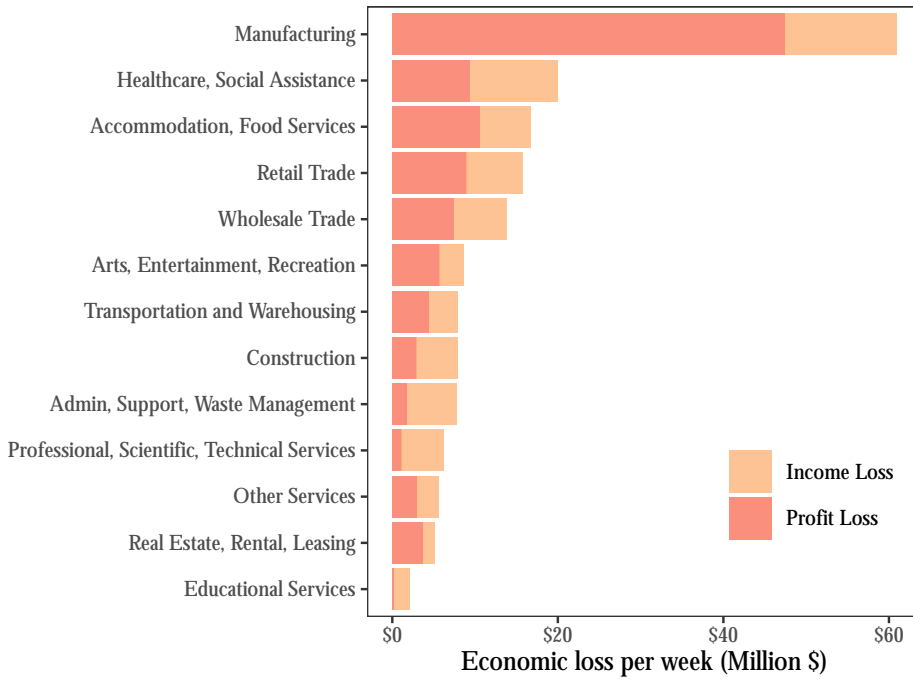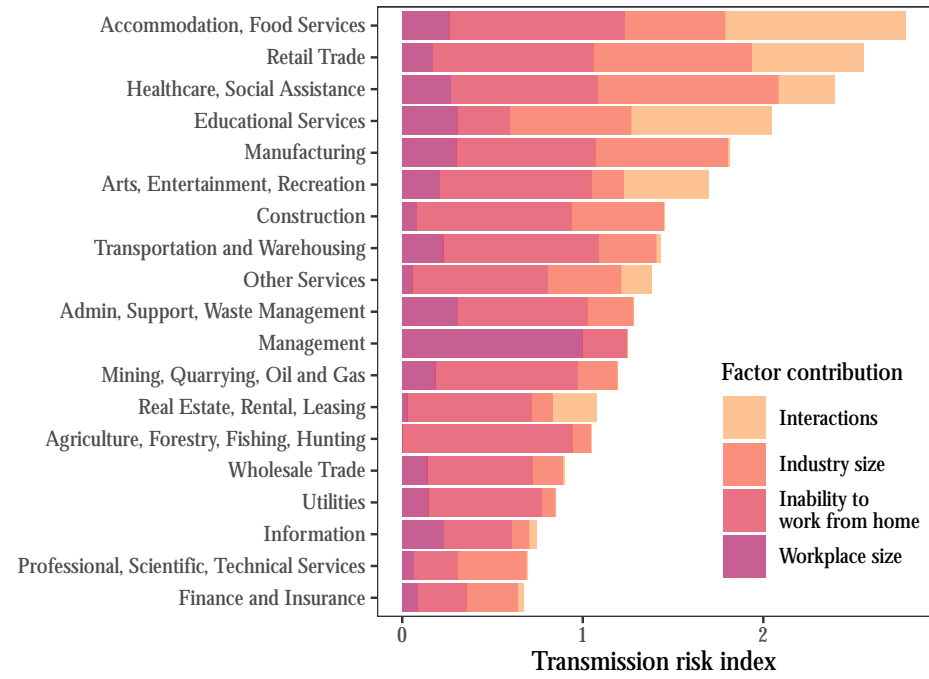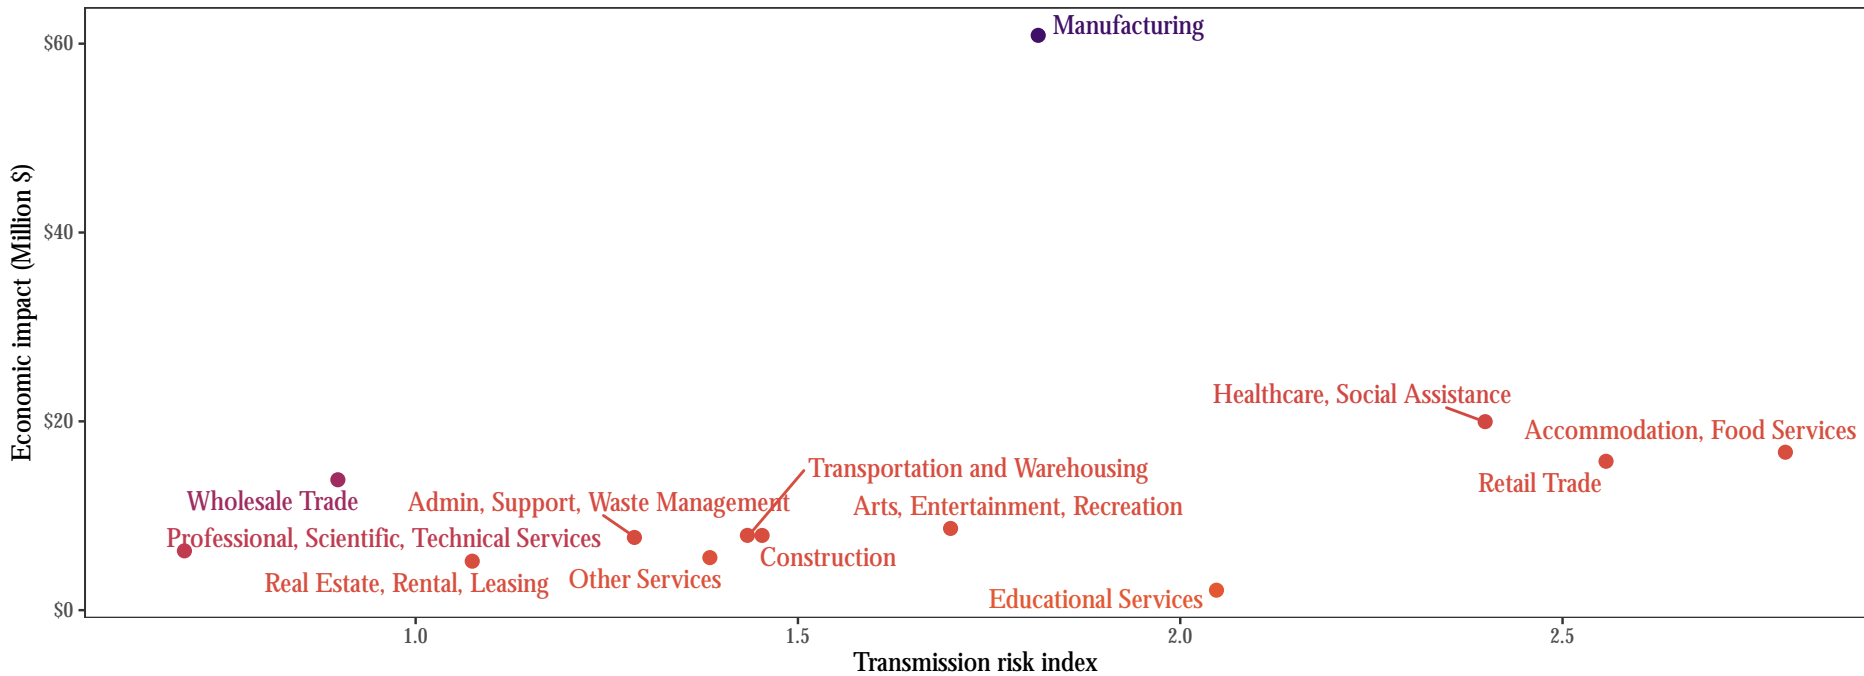

# Oregon

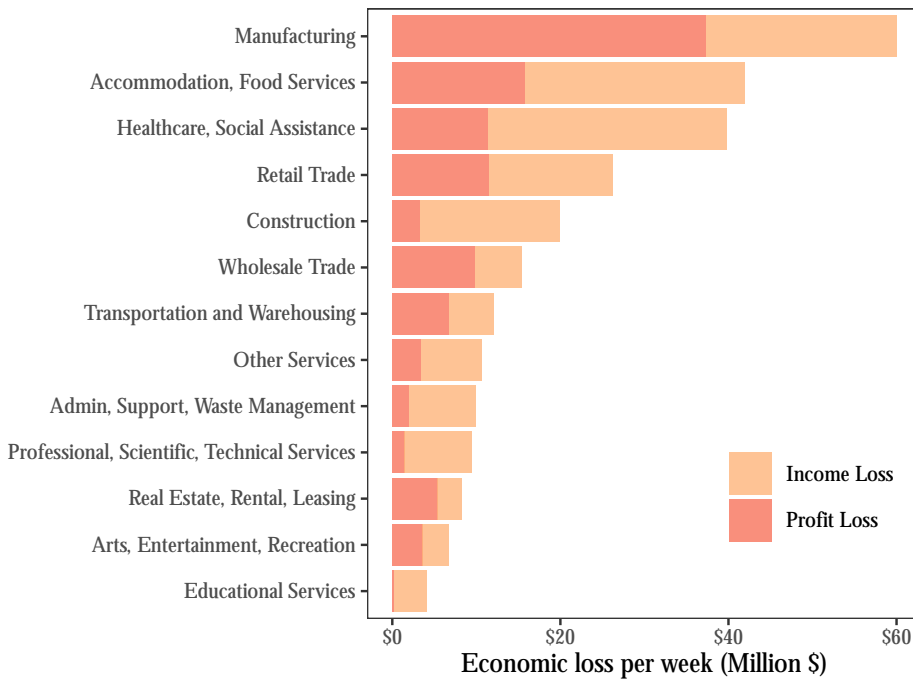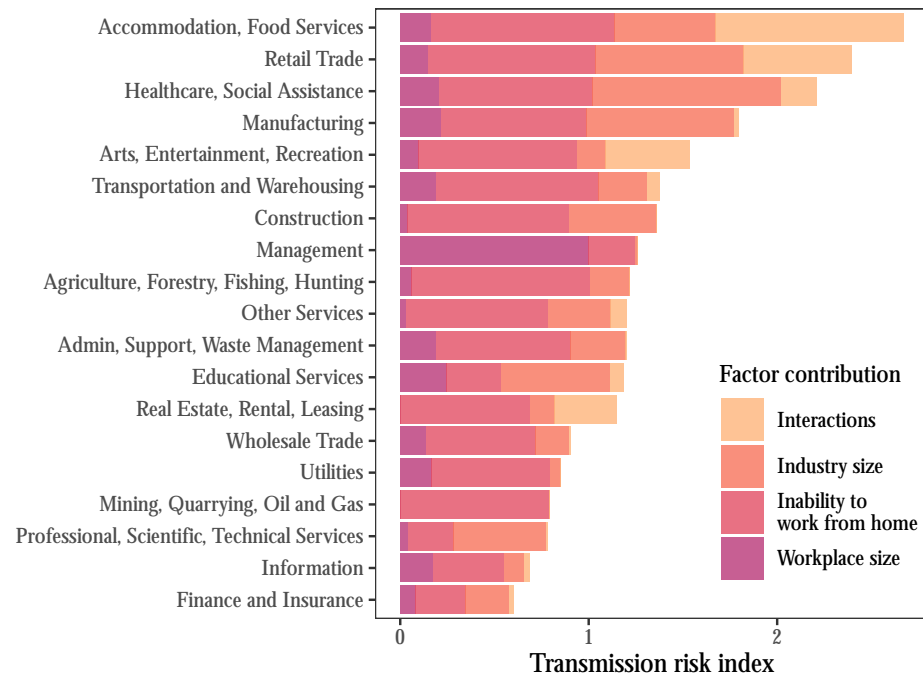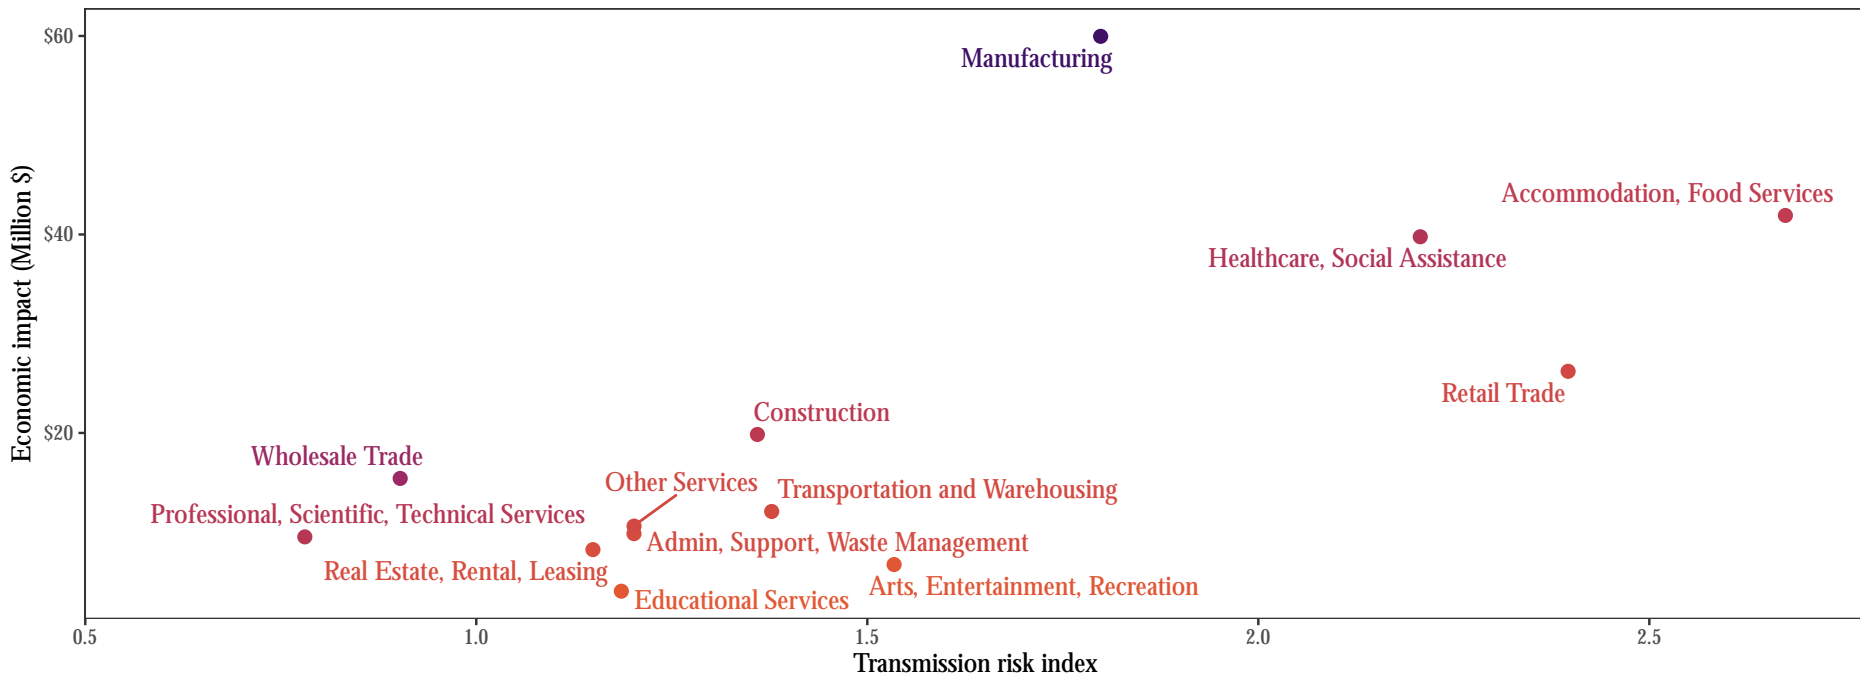

# Pennsylvania

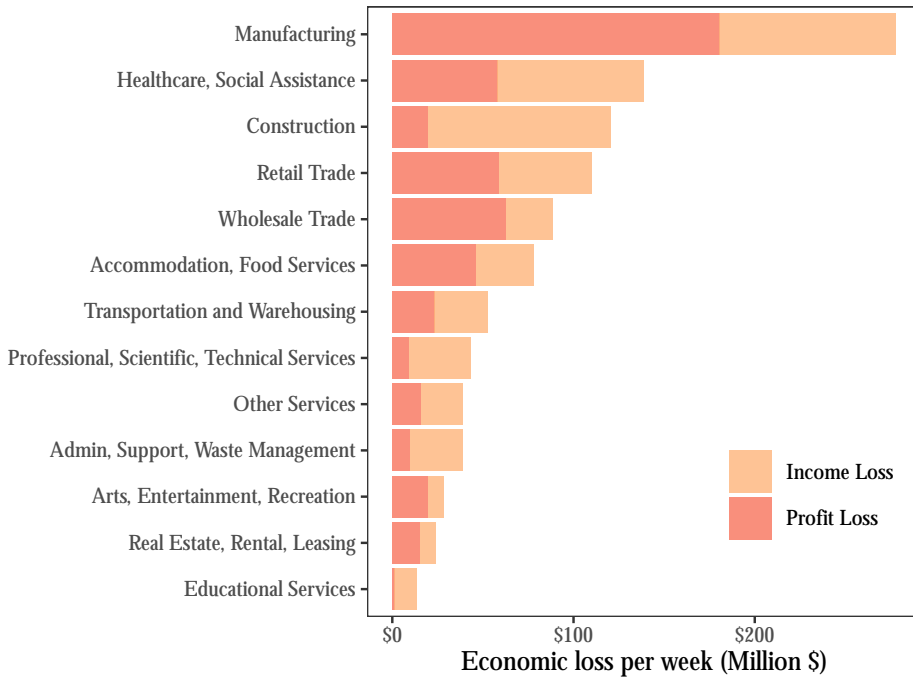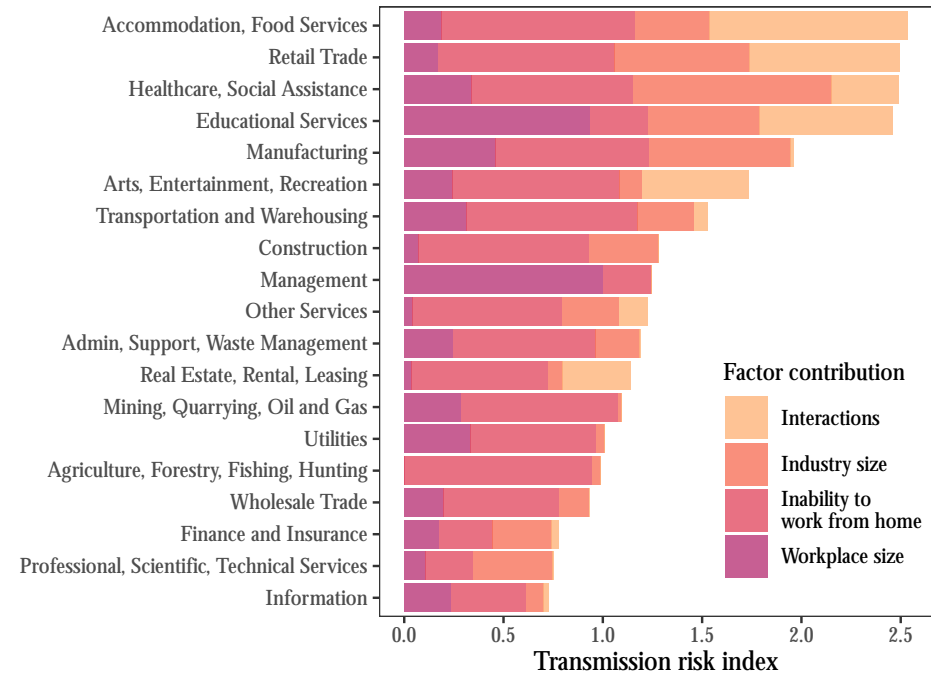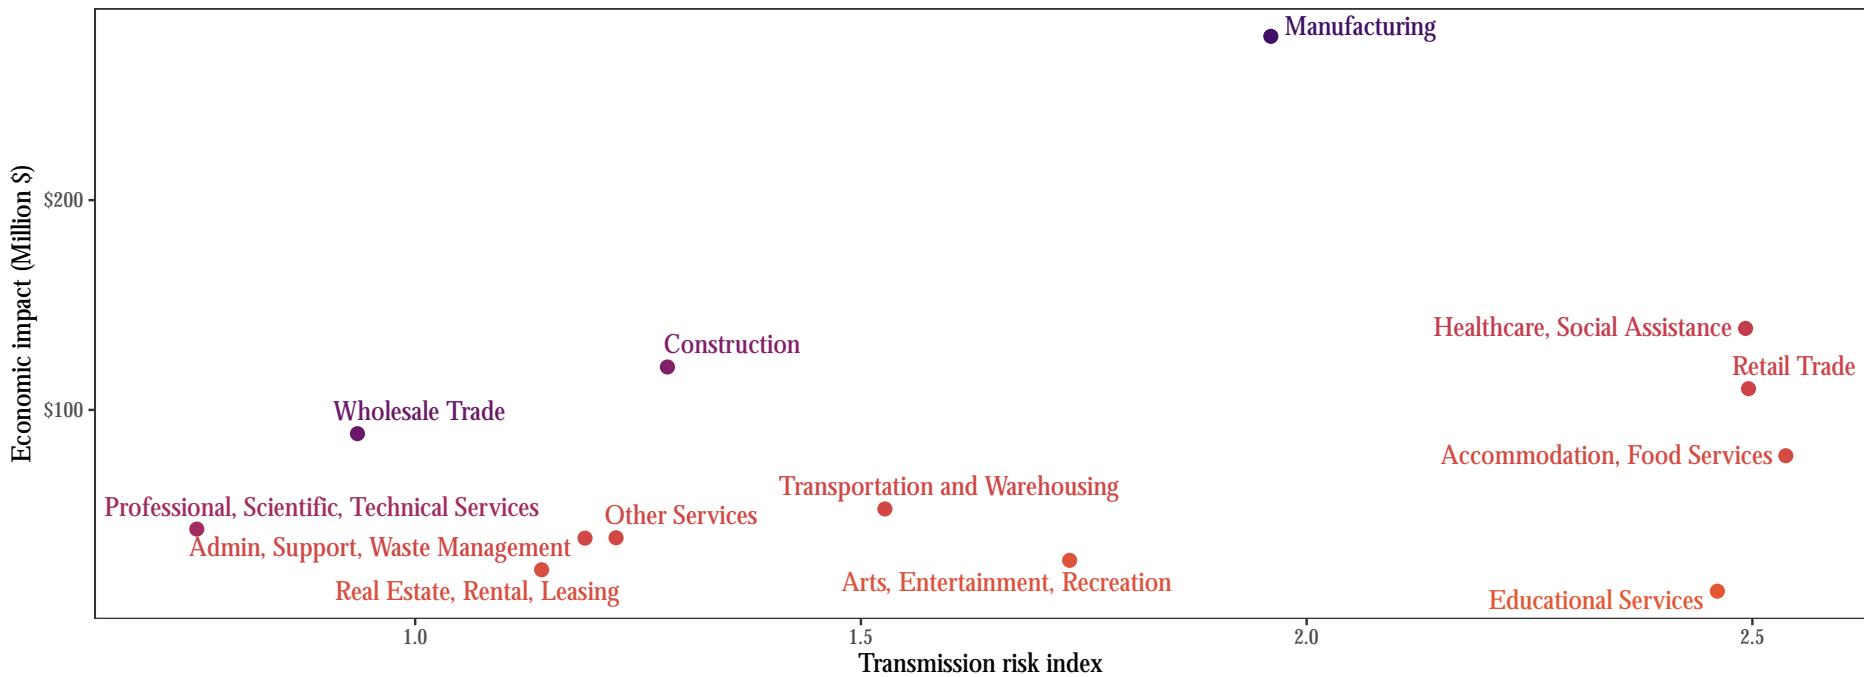

# Rhode Island

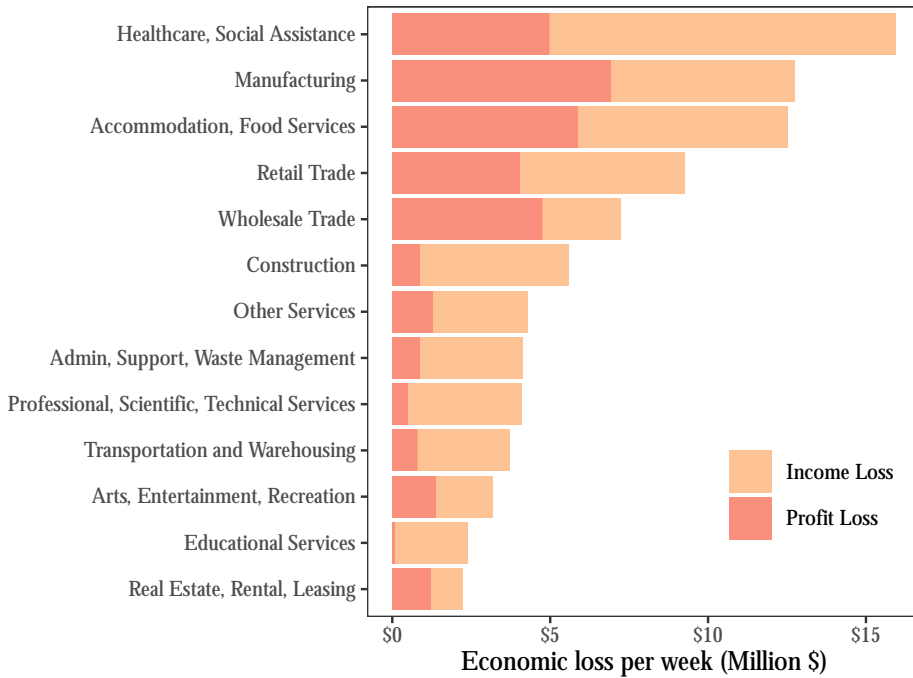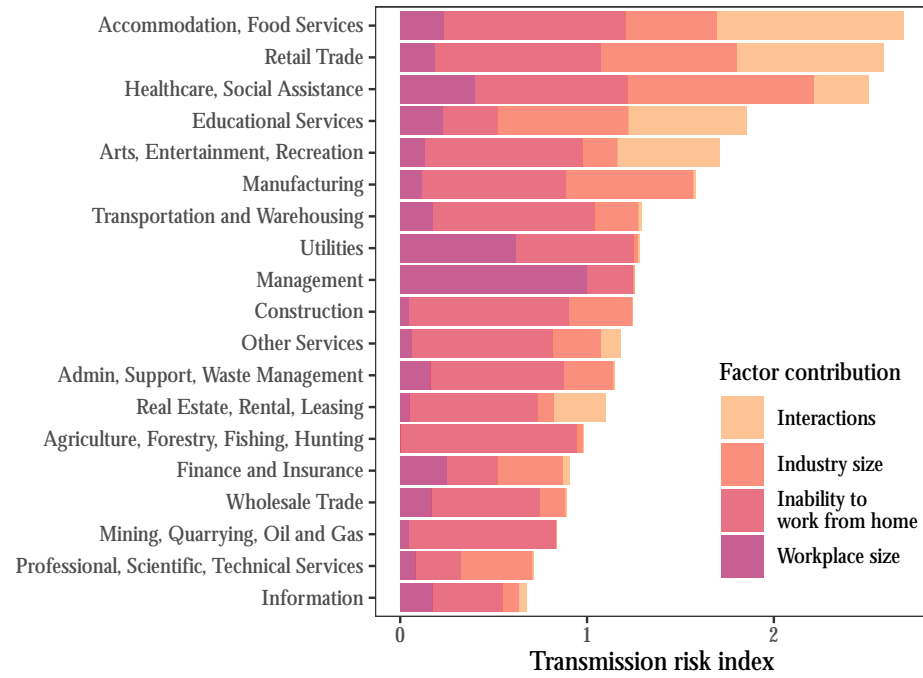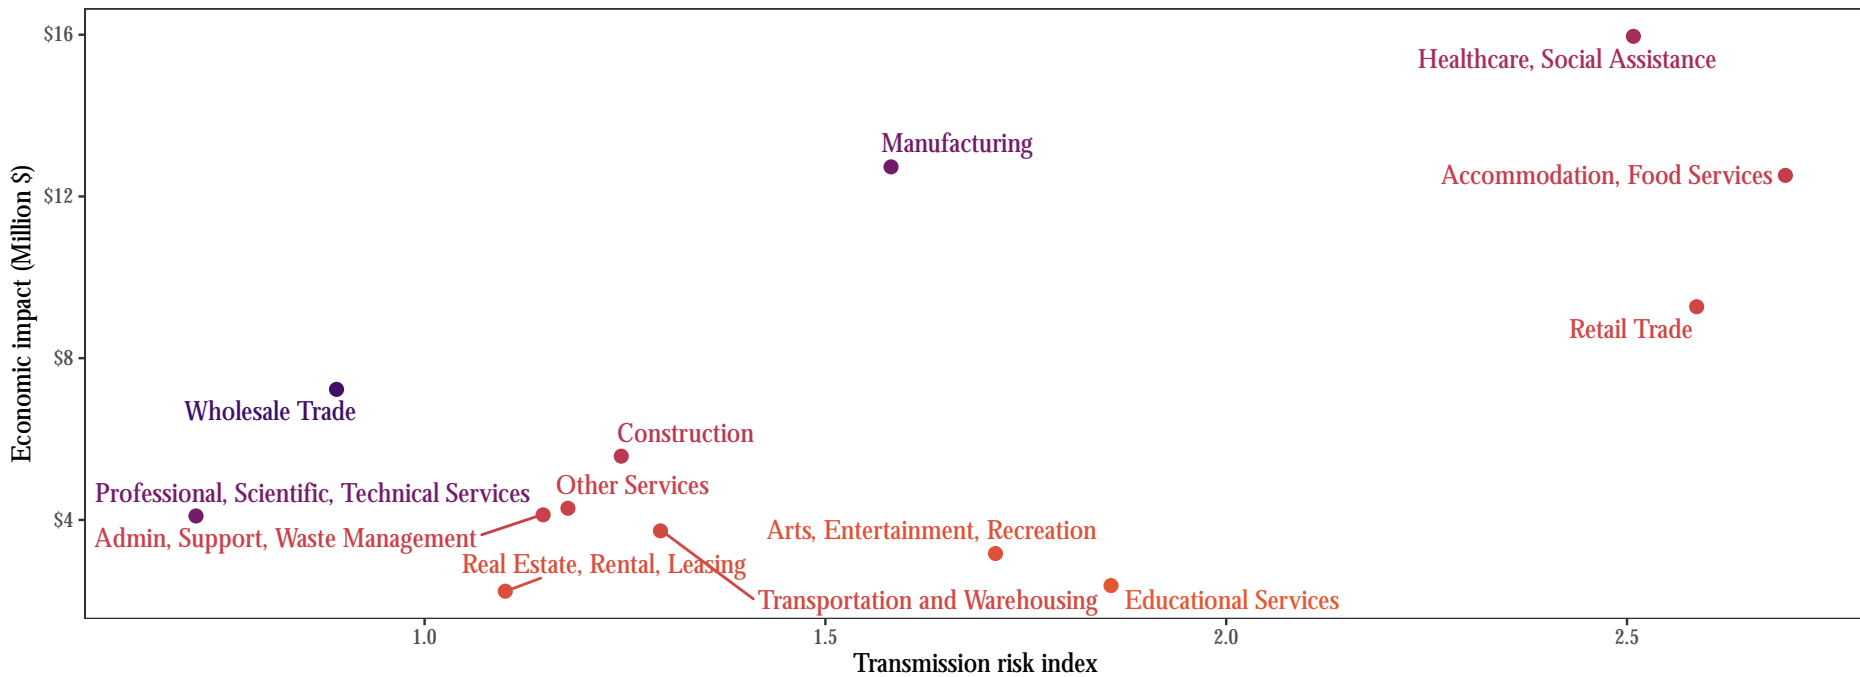



# South Carolina

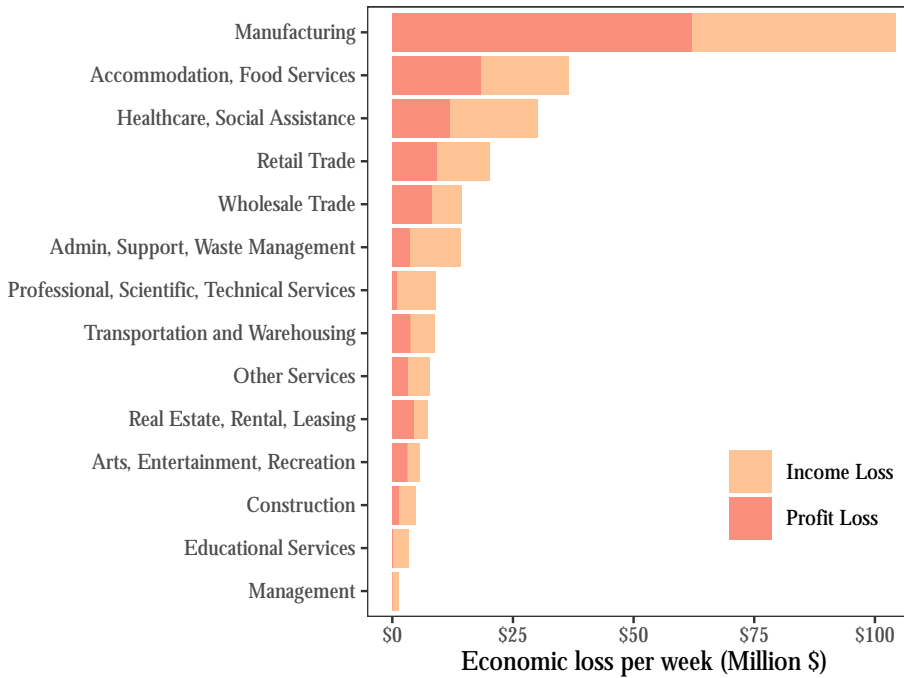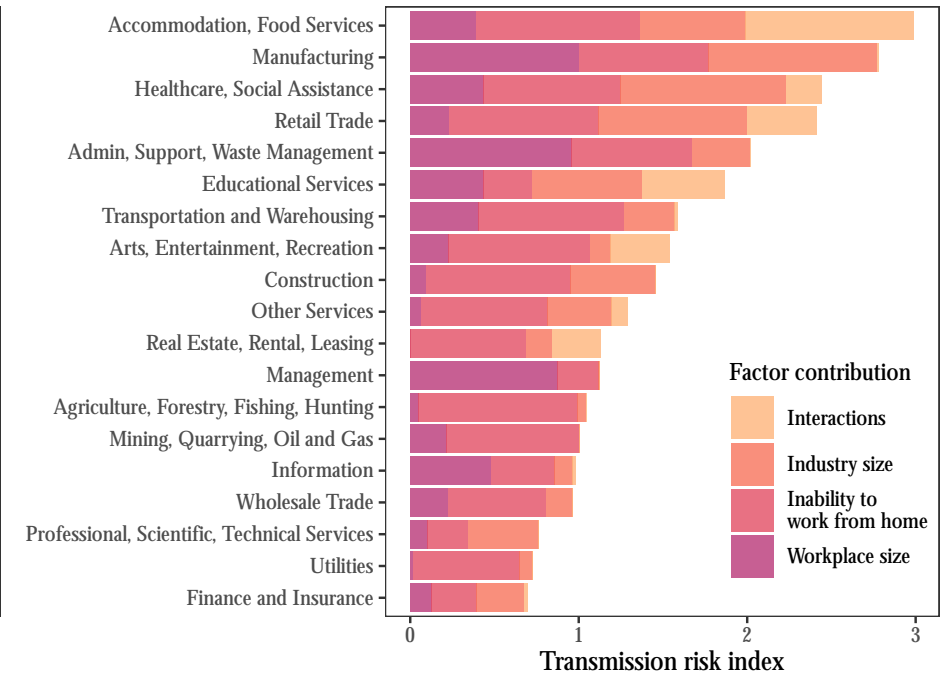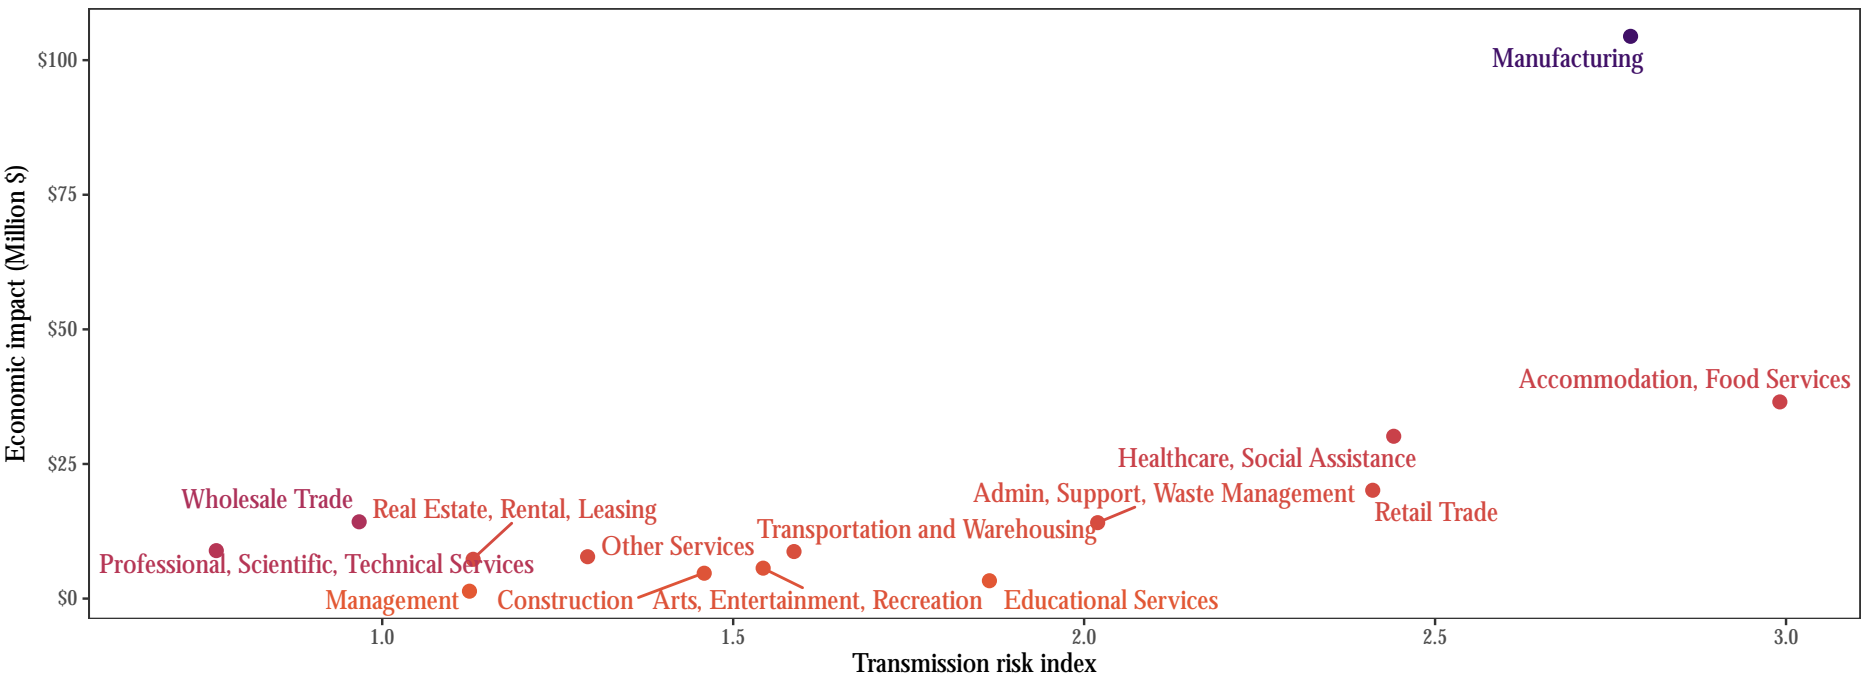

# South Dakota

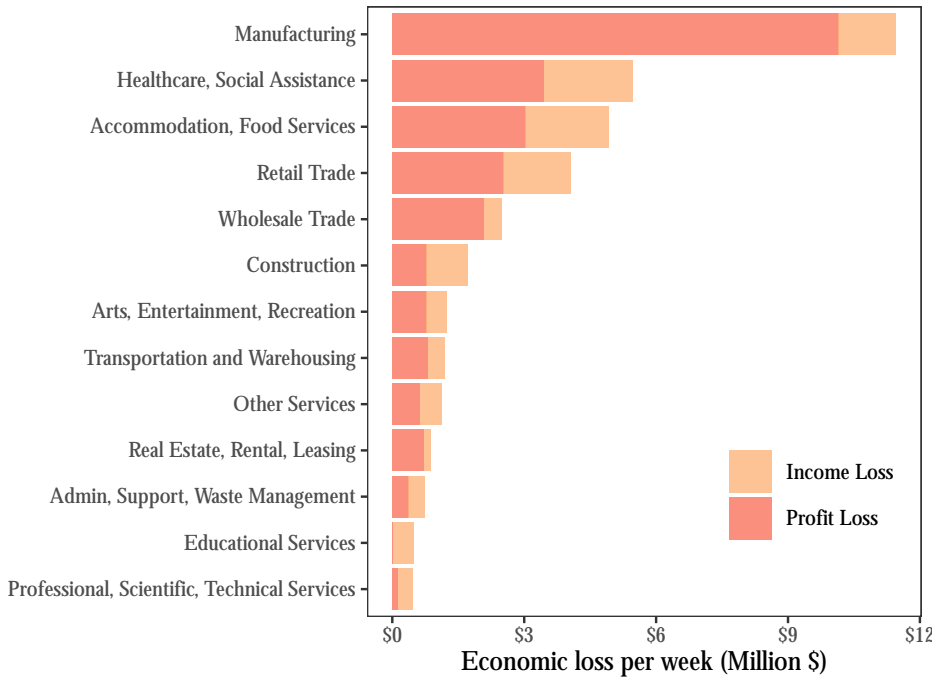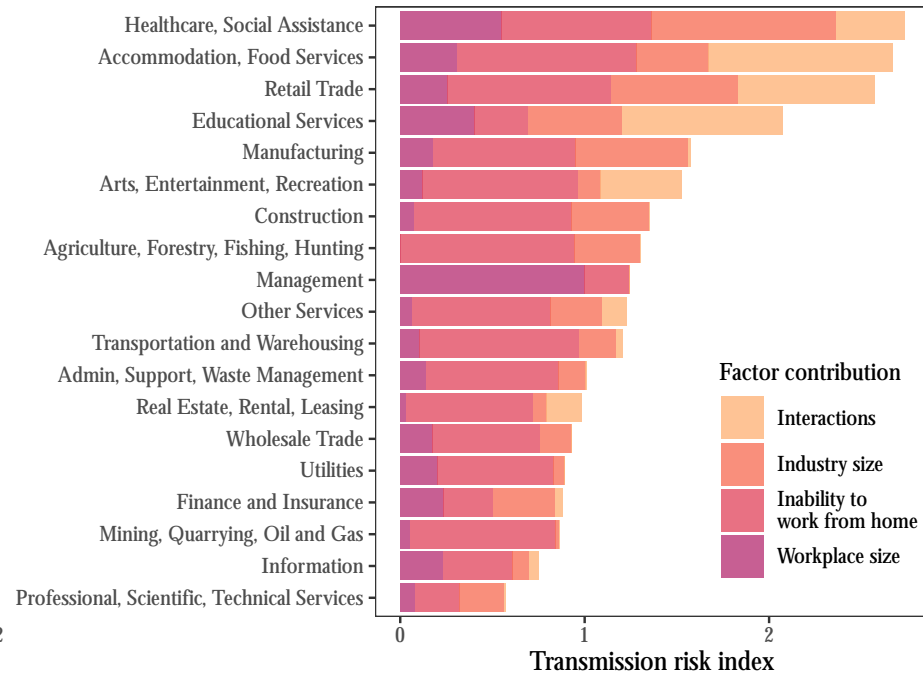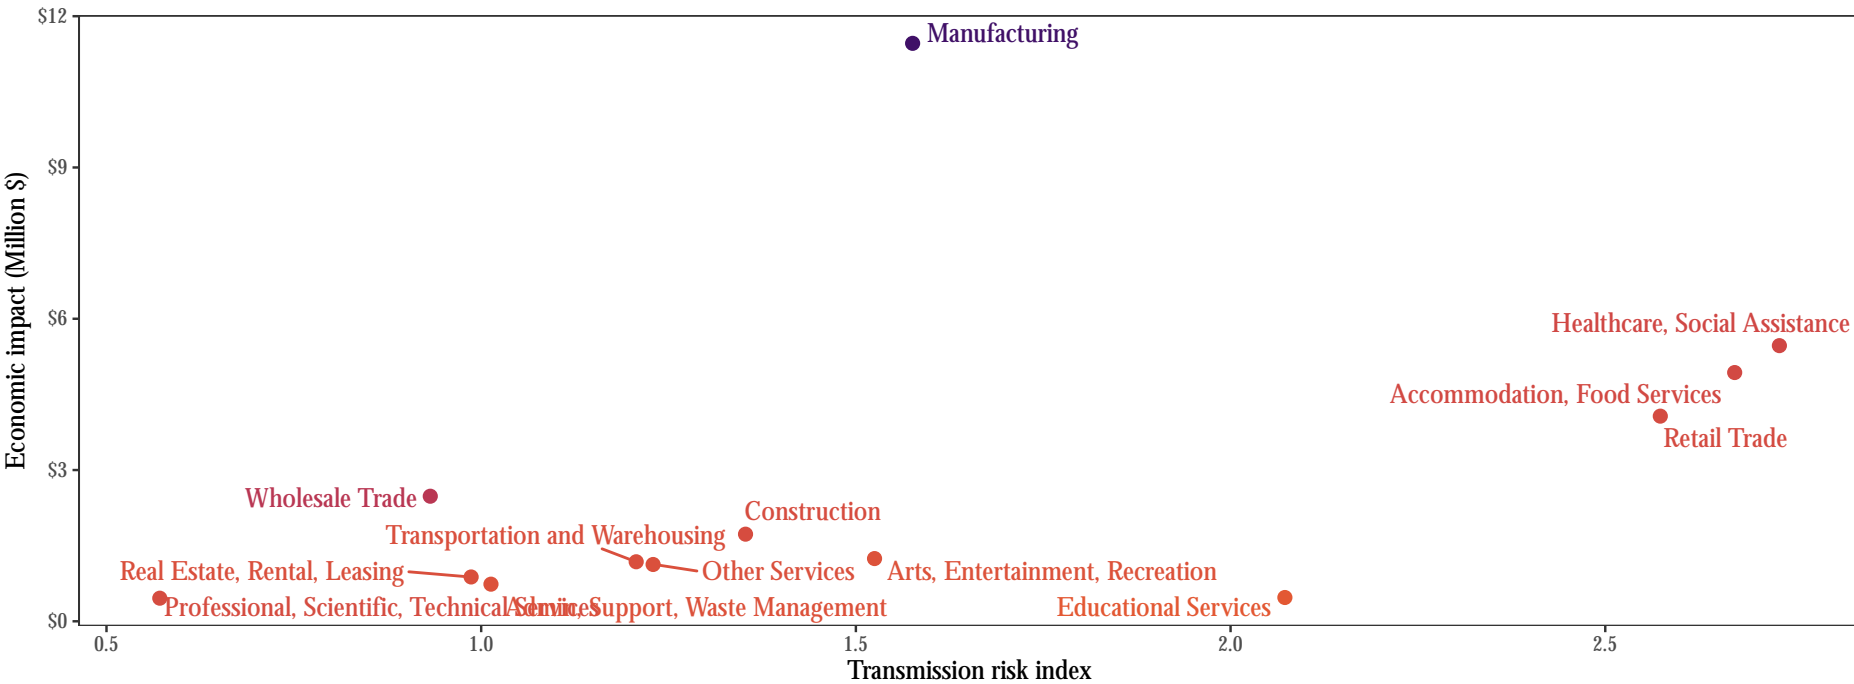

# Tennessee

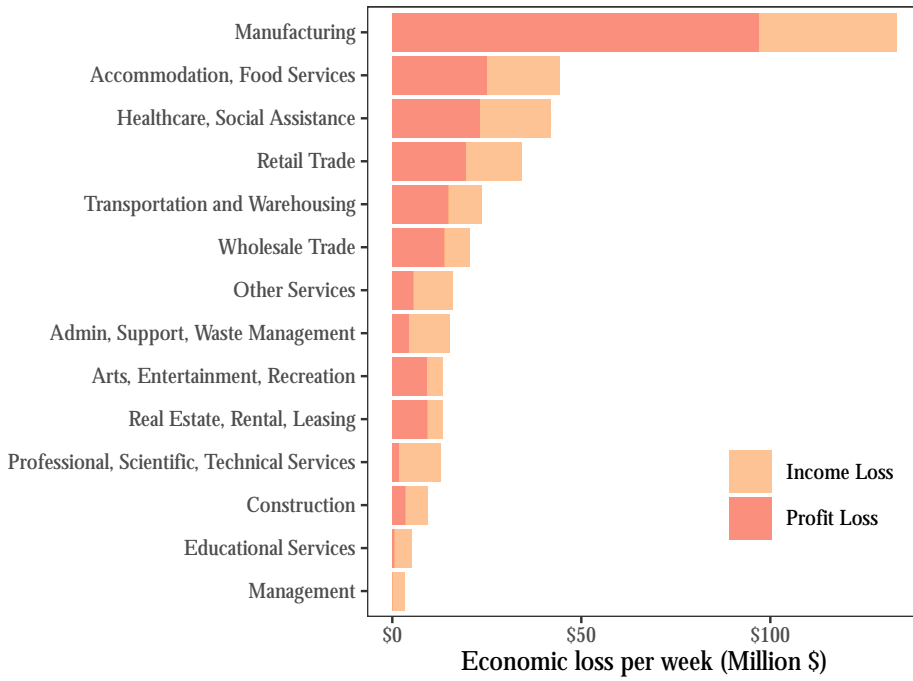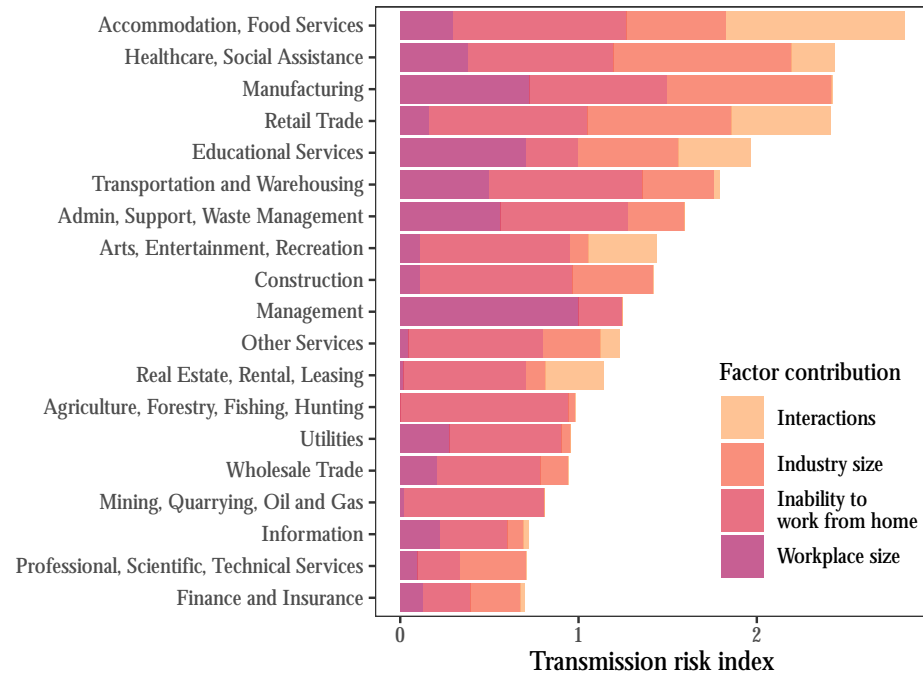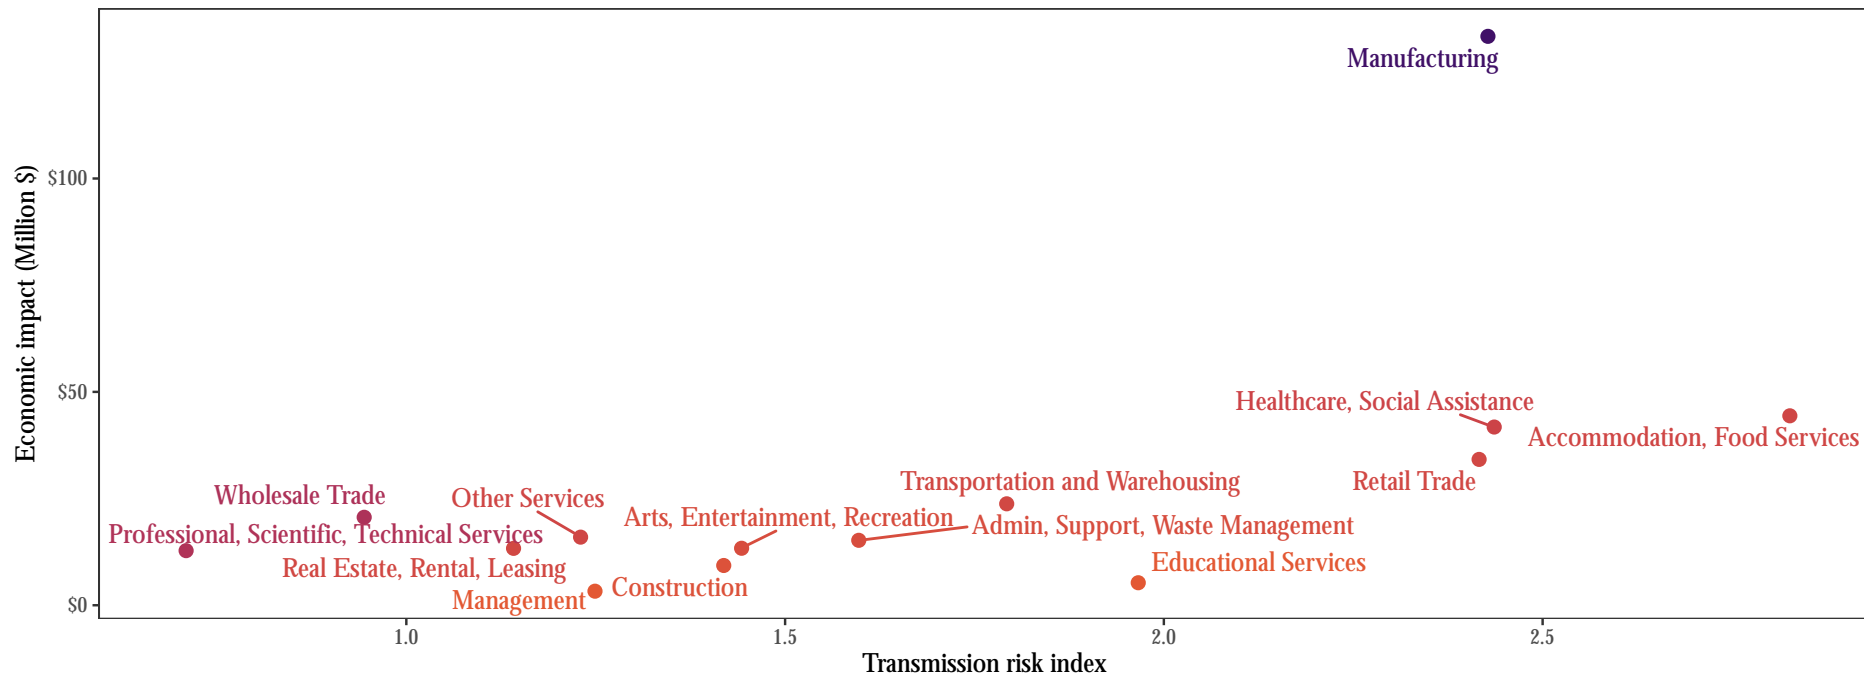

# Texas

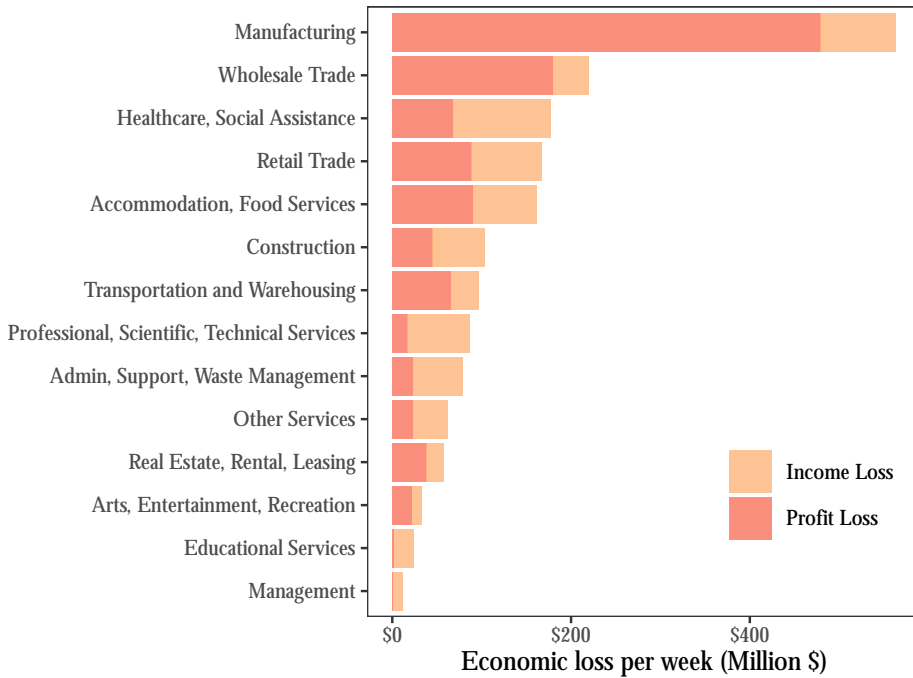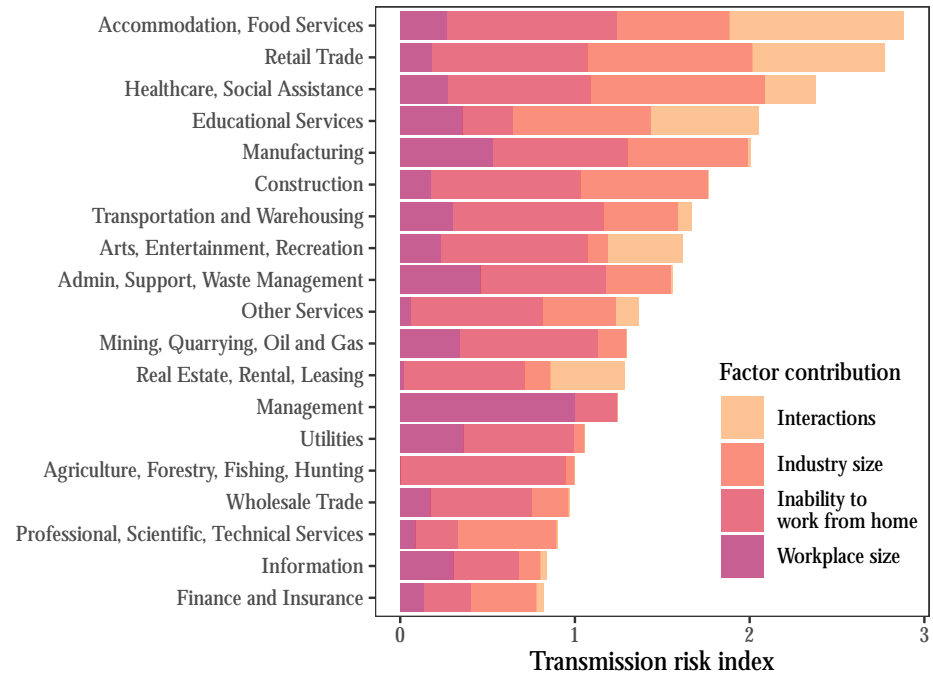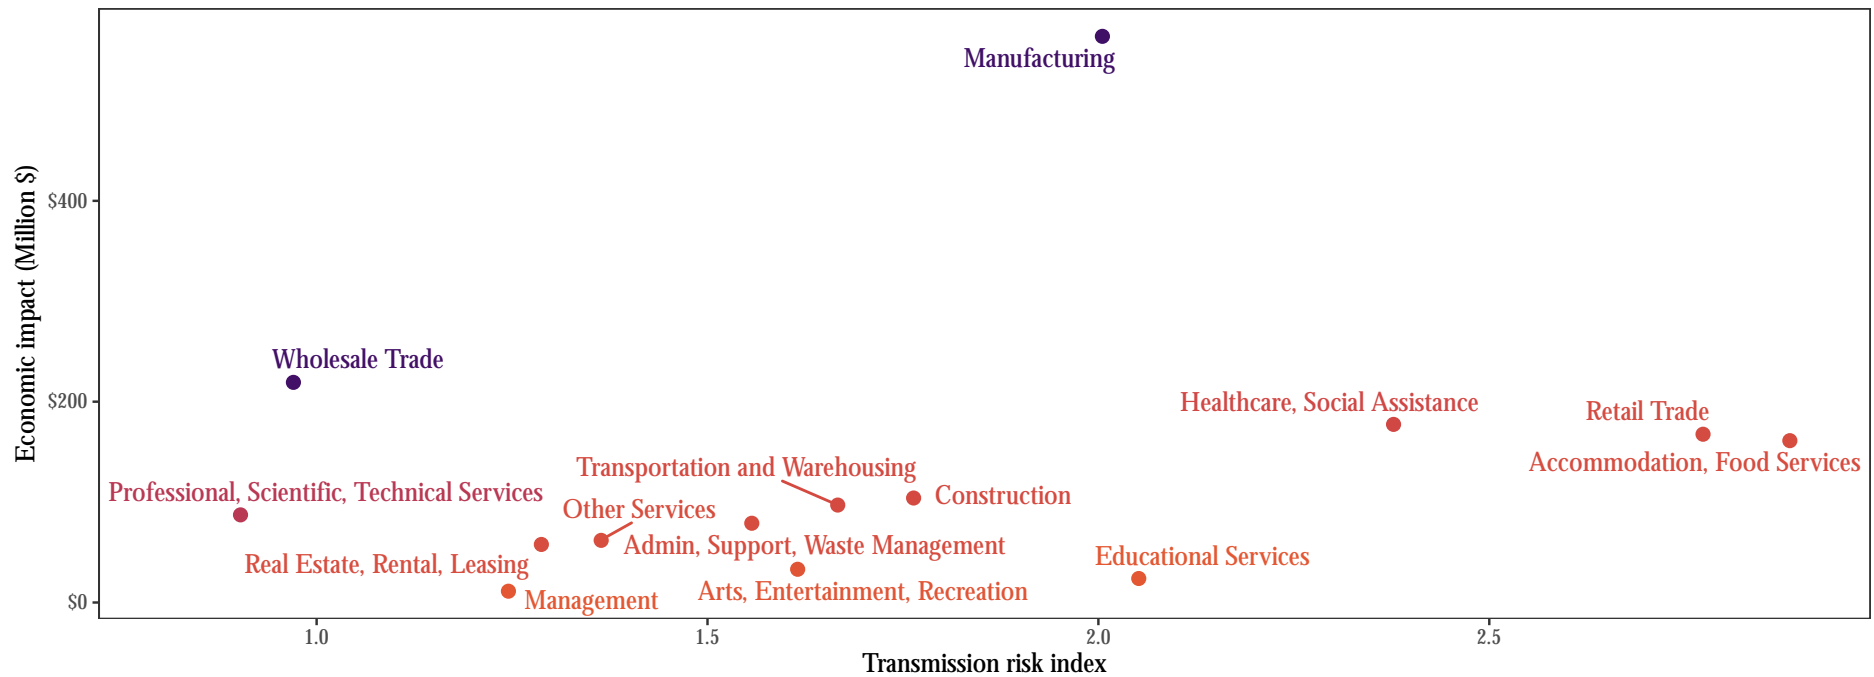

# Utah

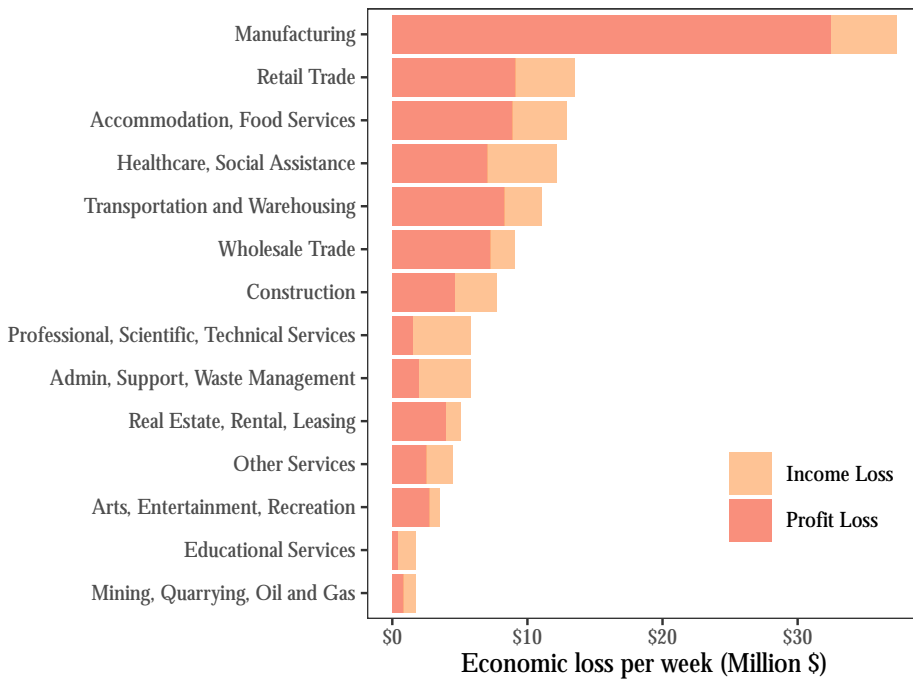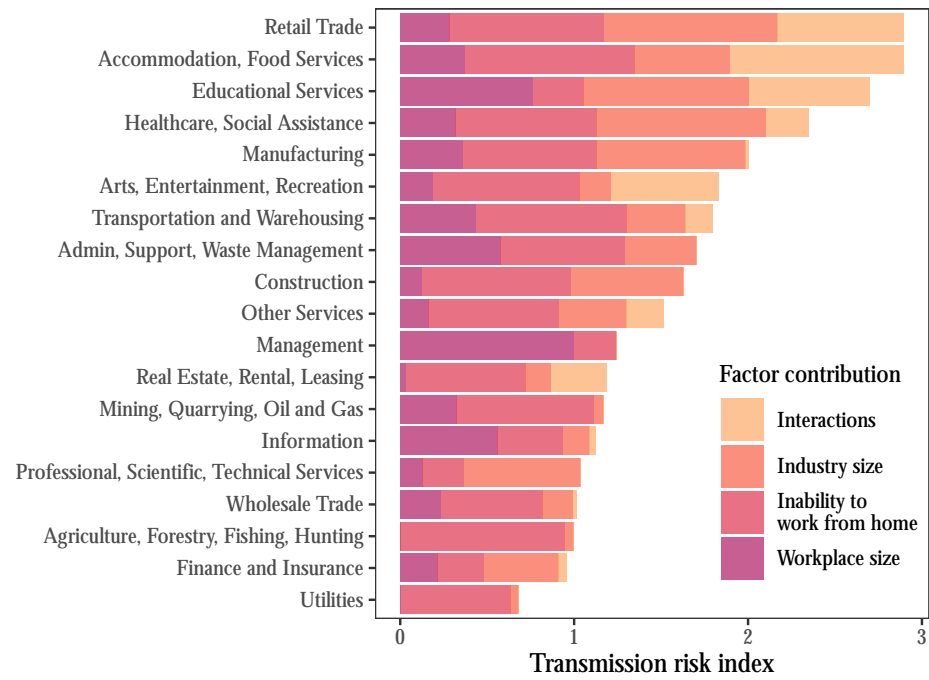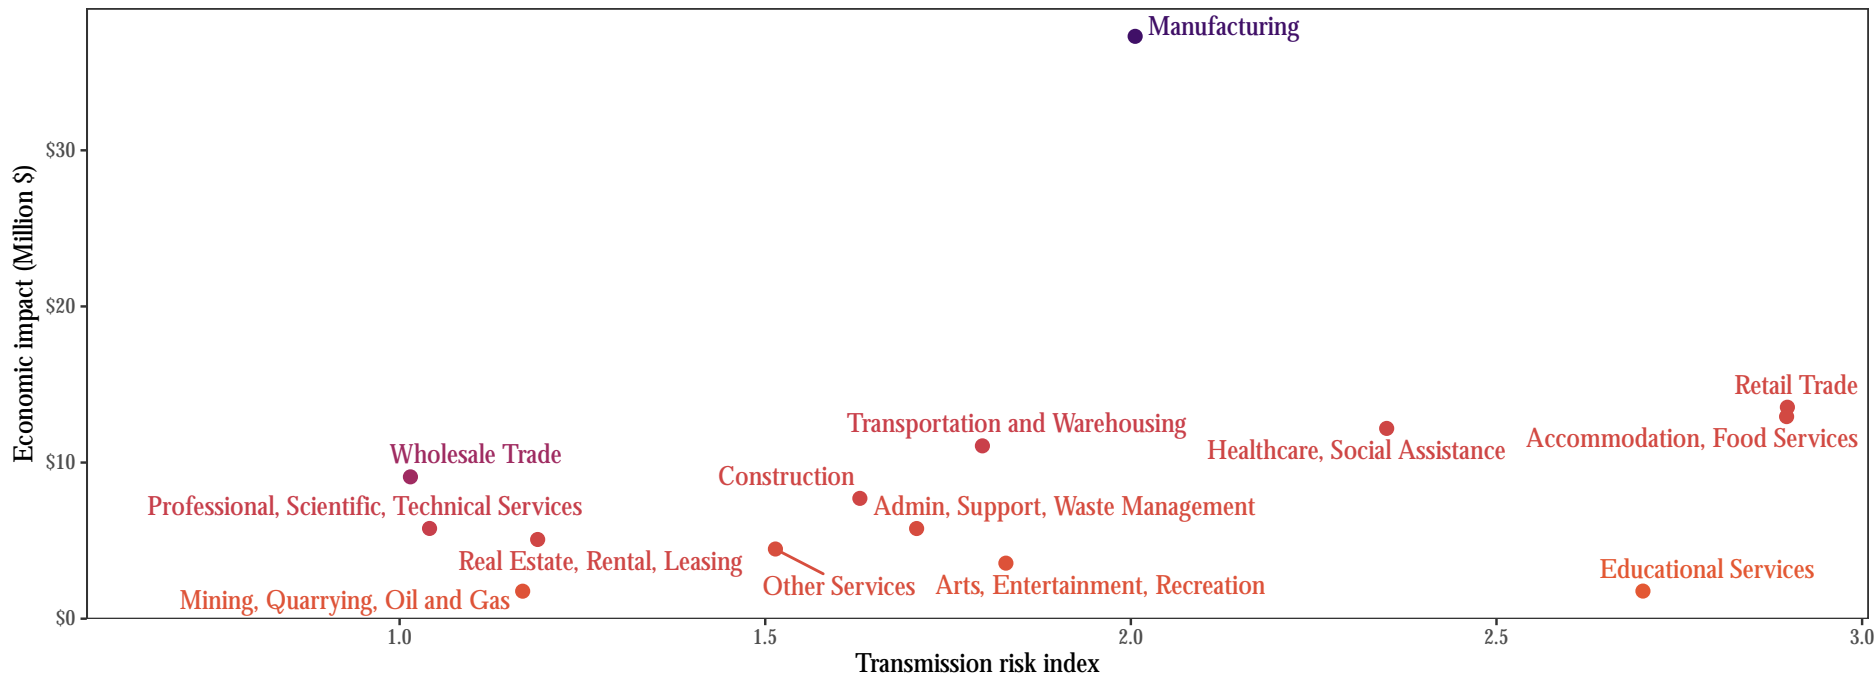

# Vermont

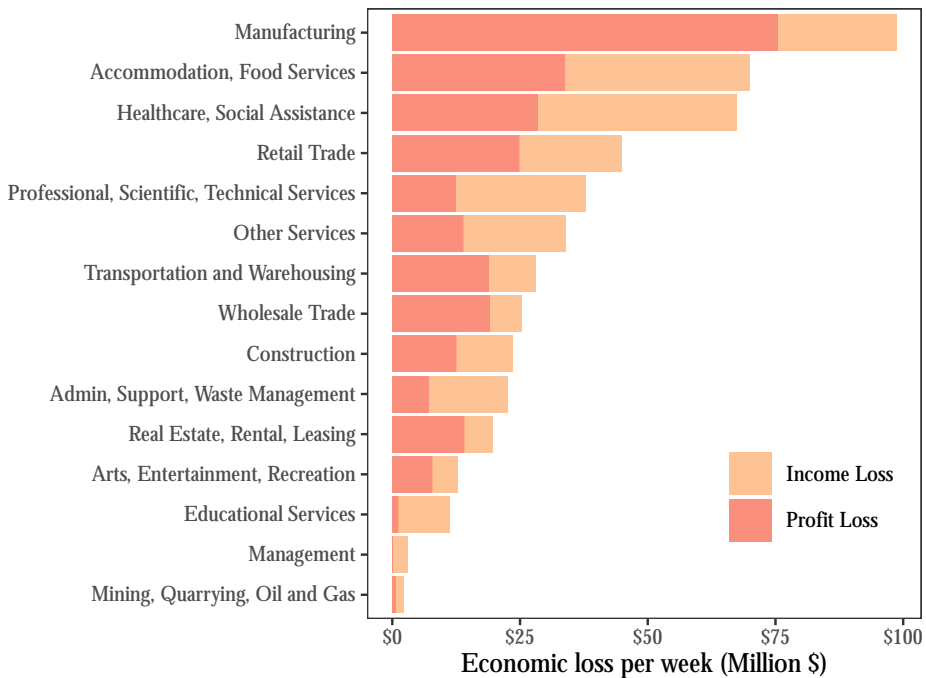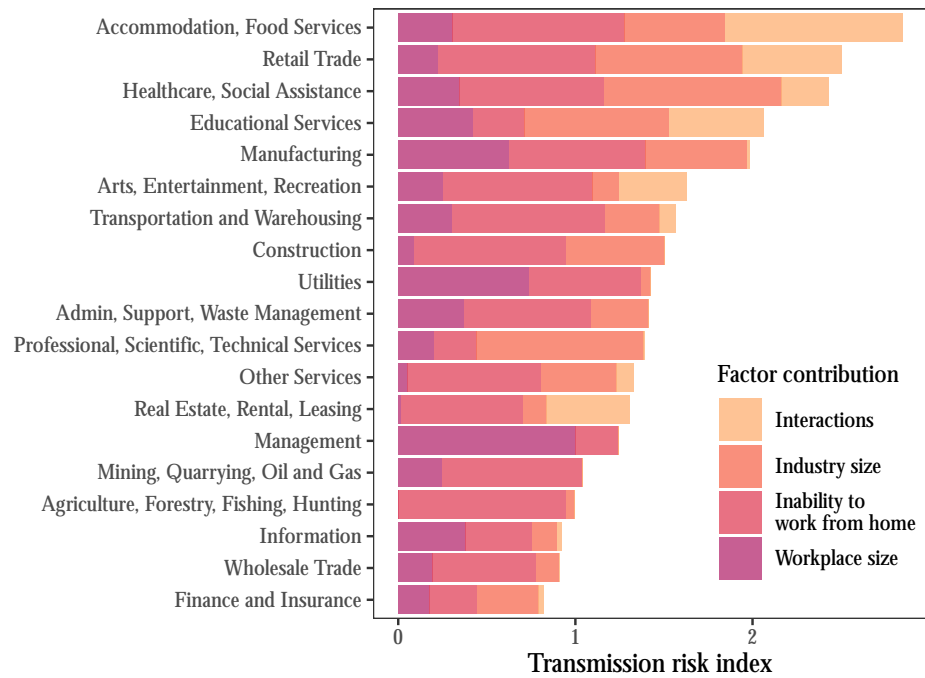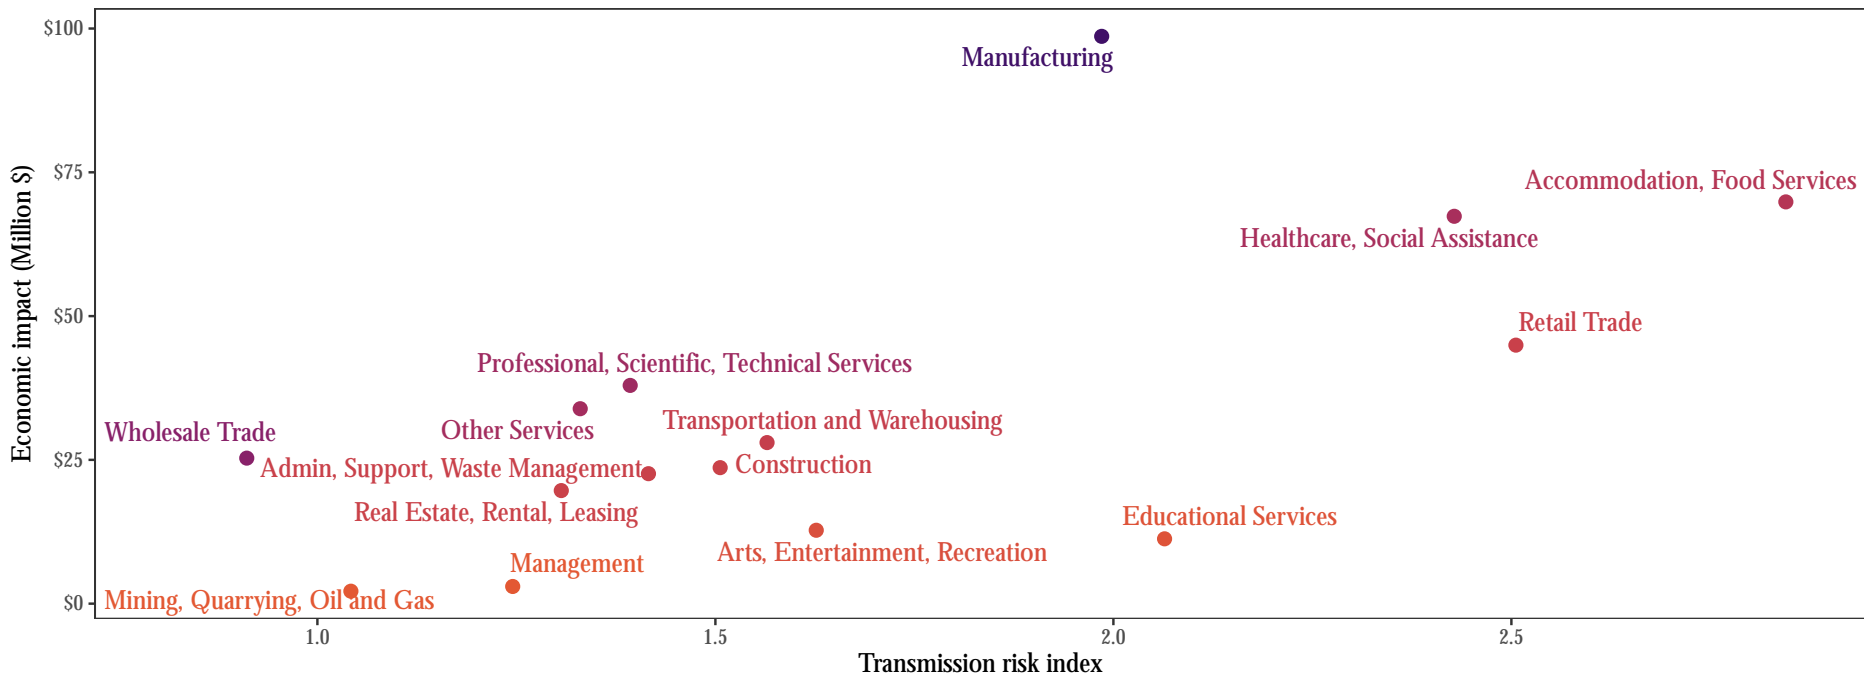

# Virginia

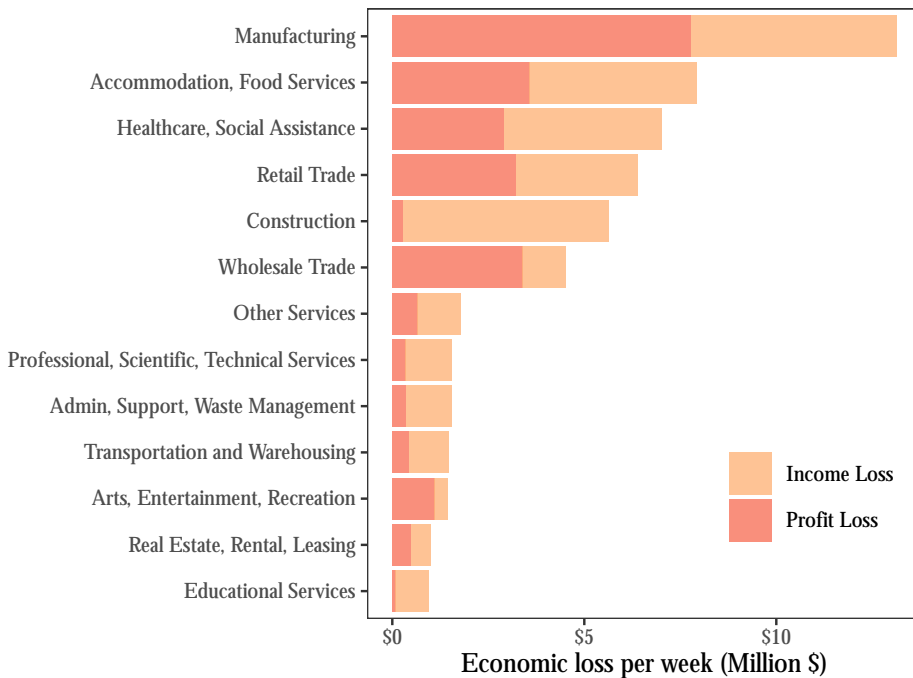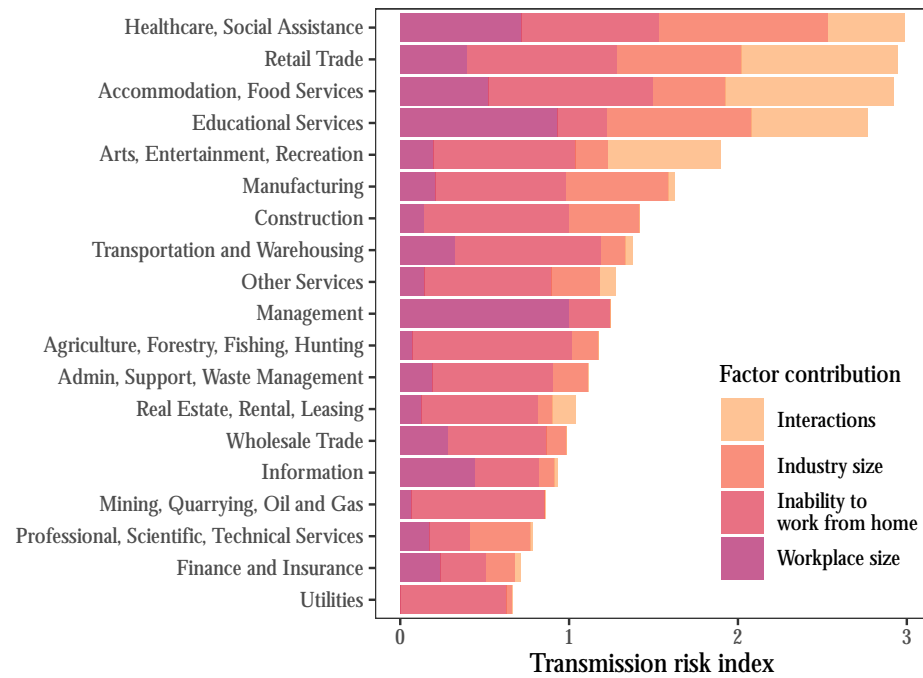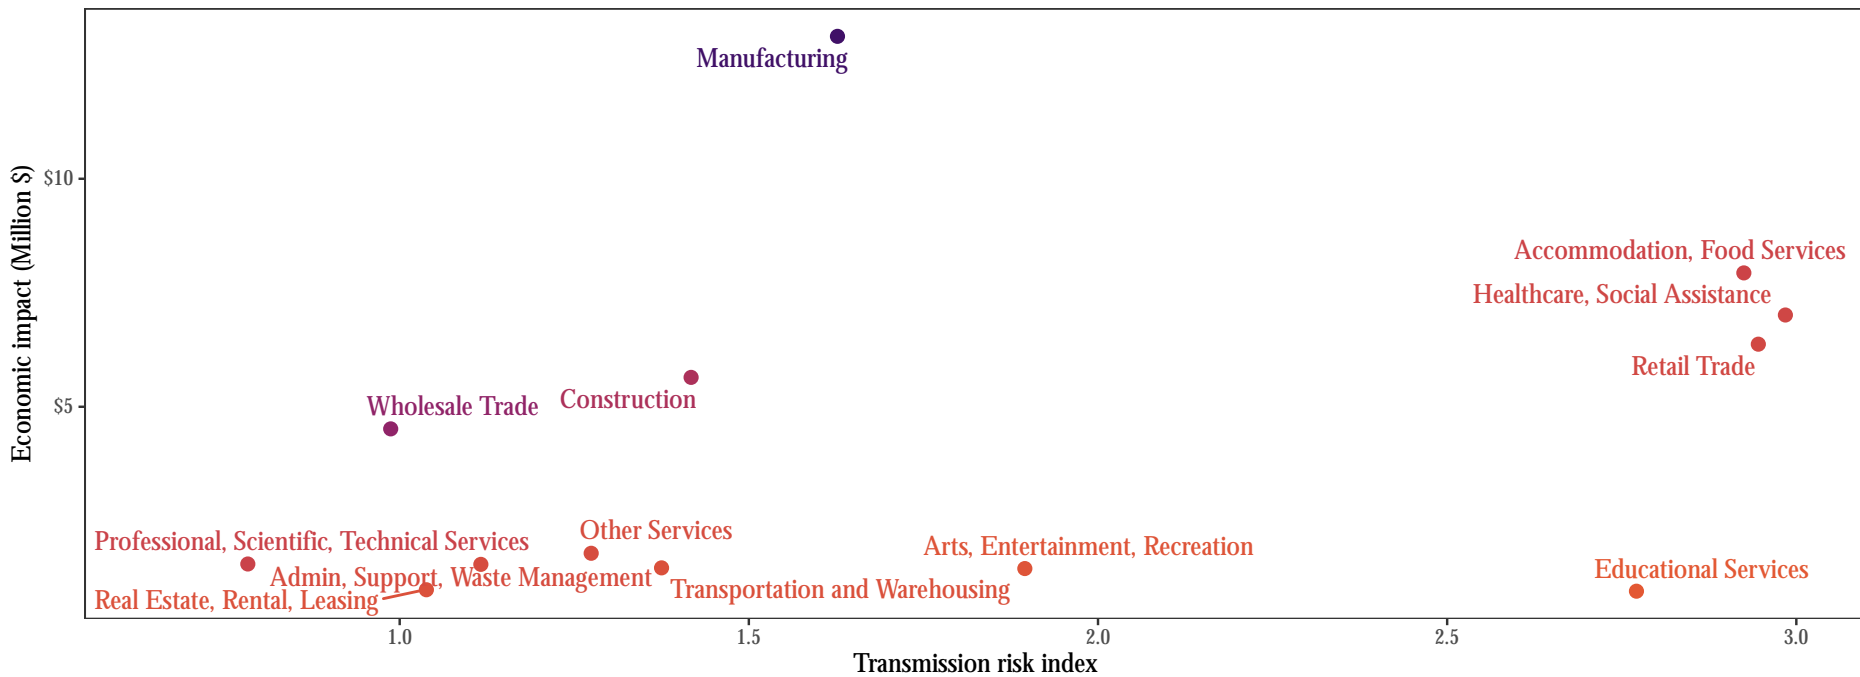

# Washington

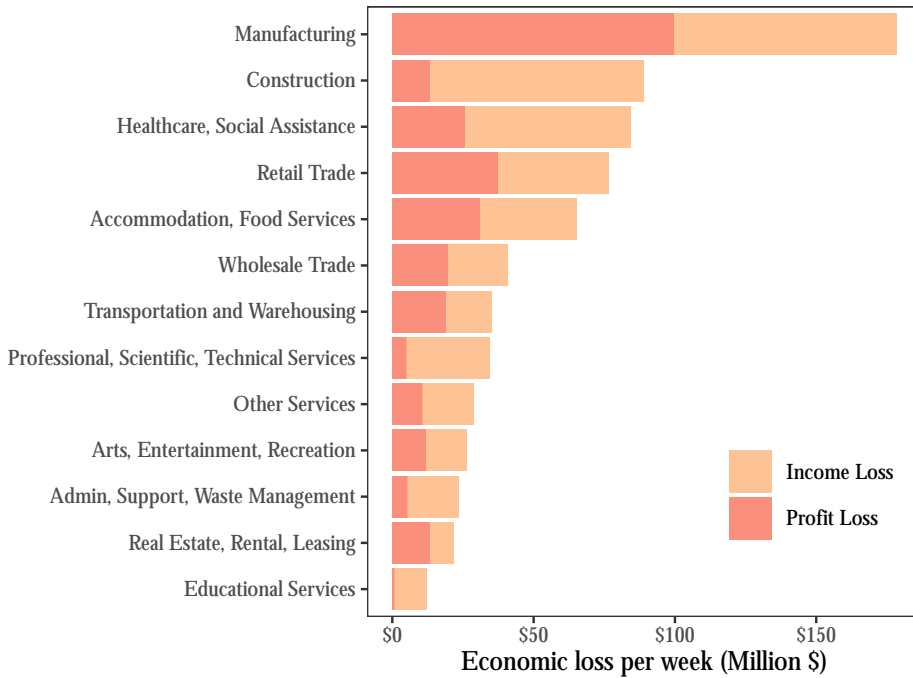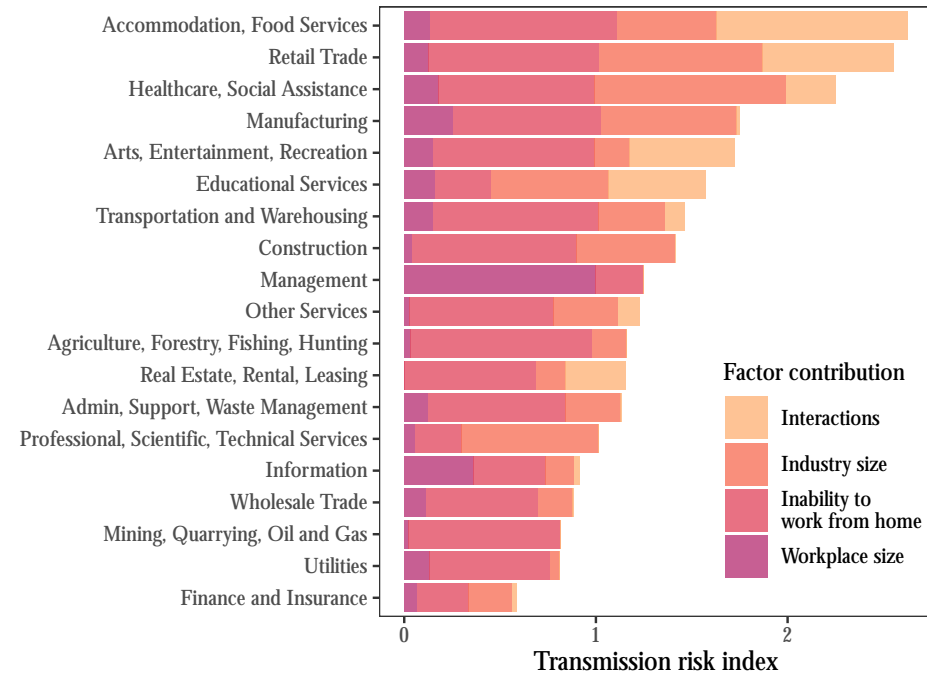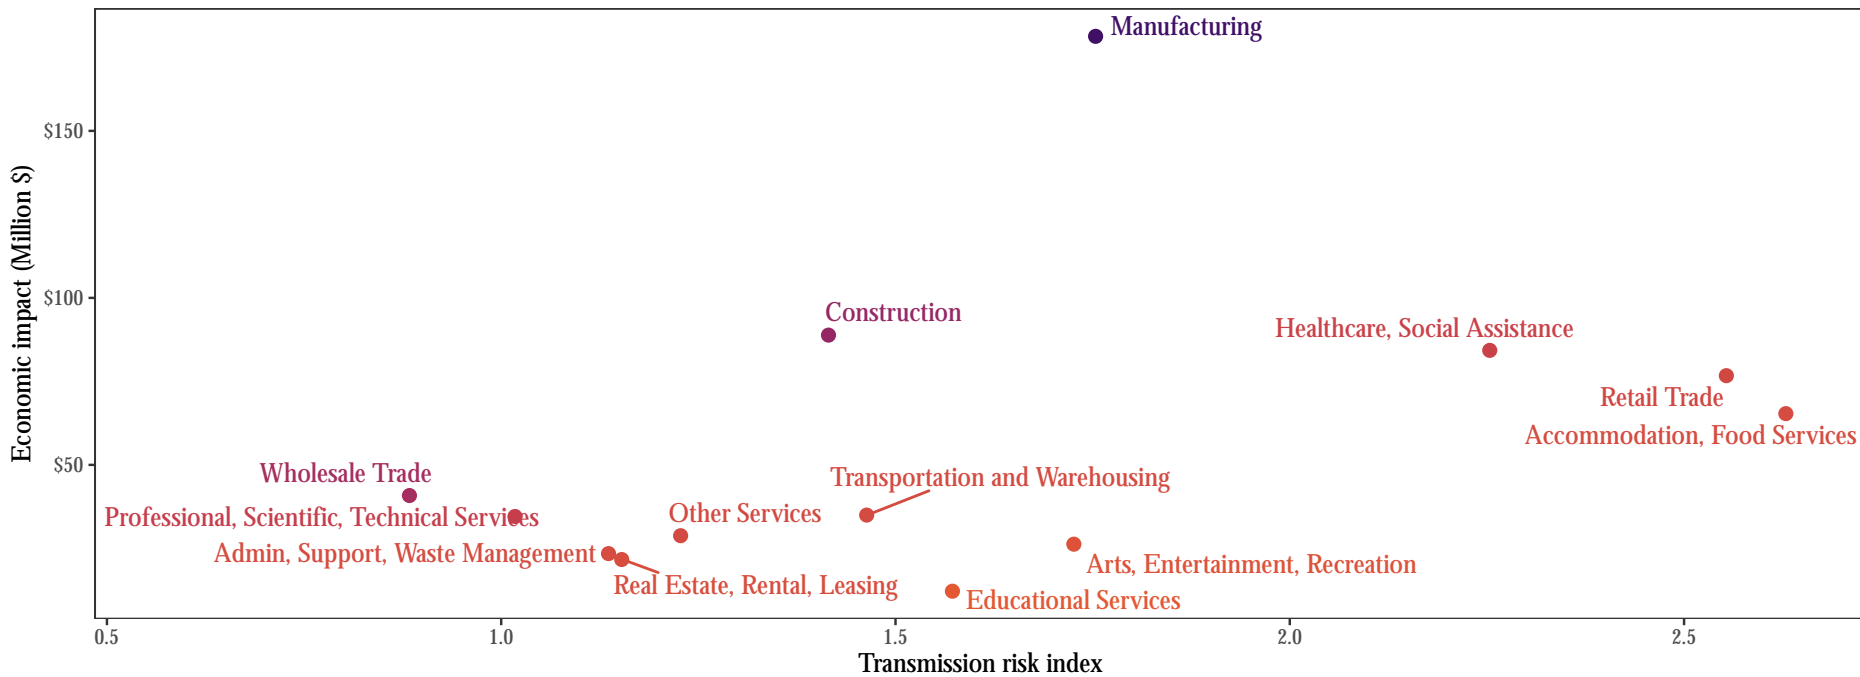



# West Virginia

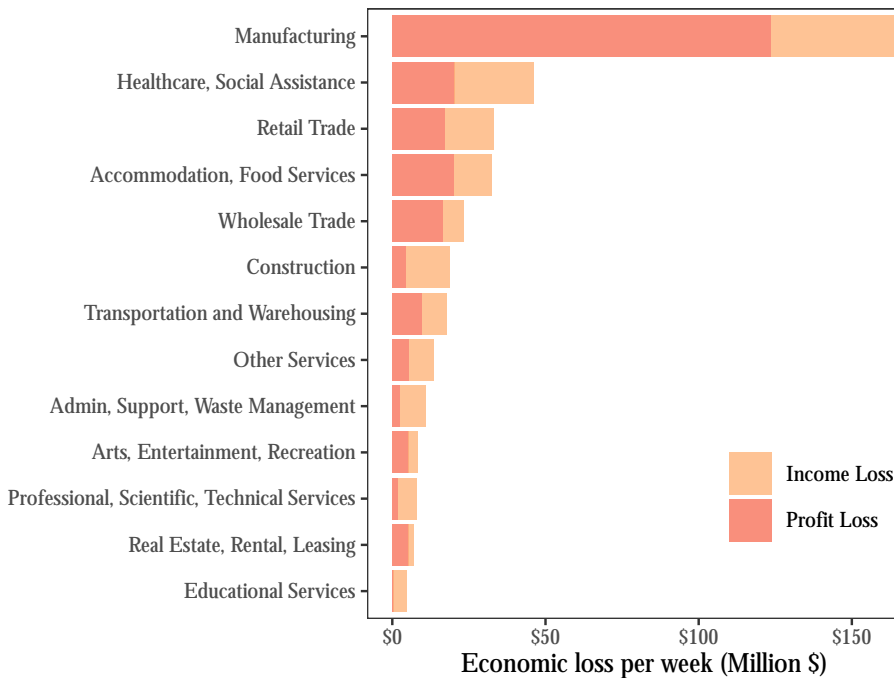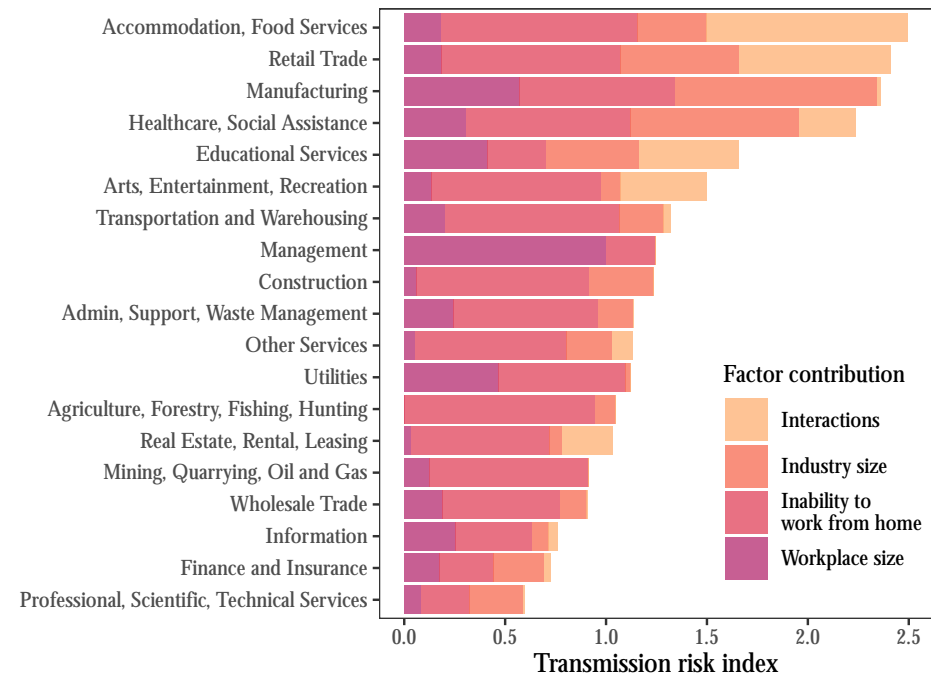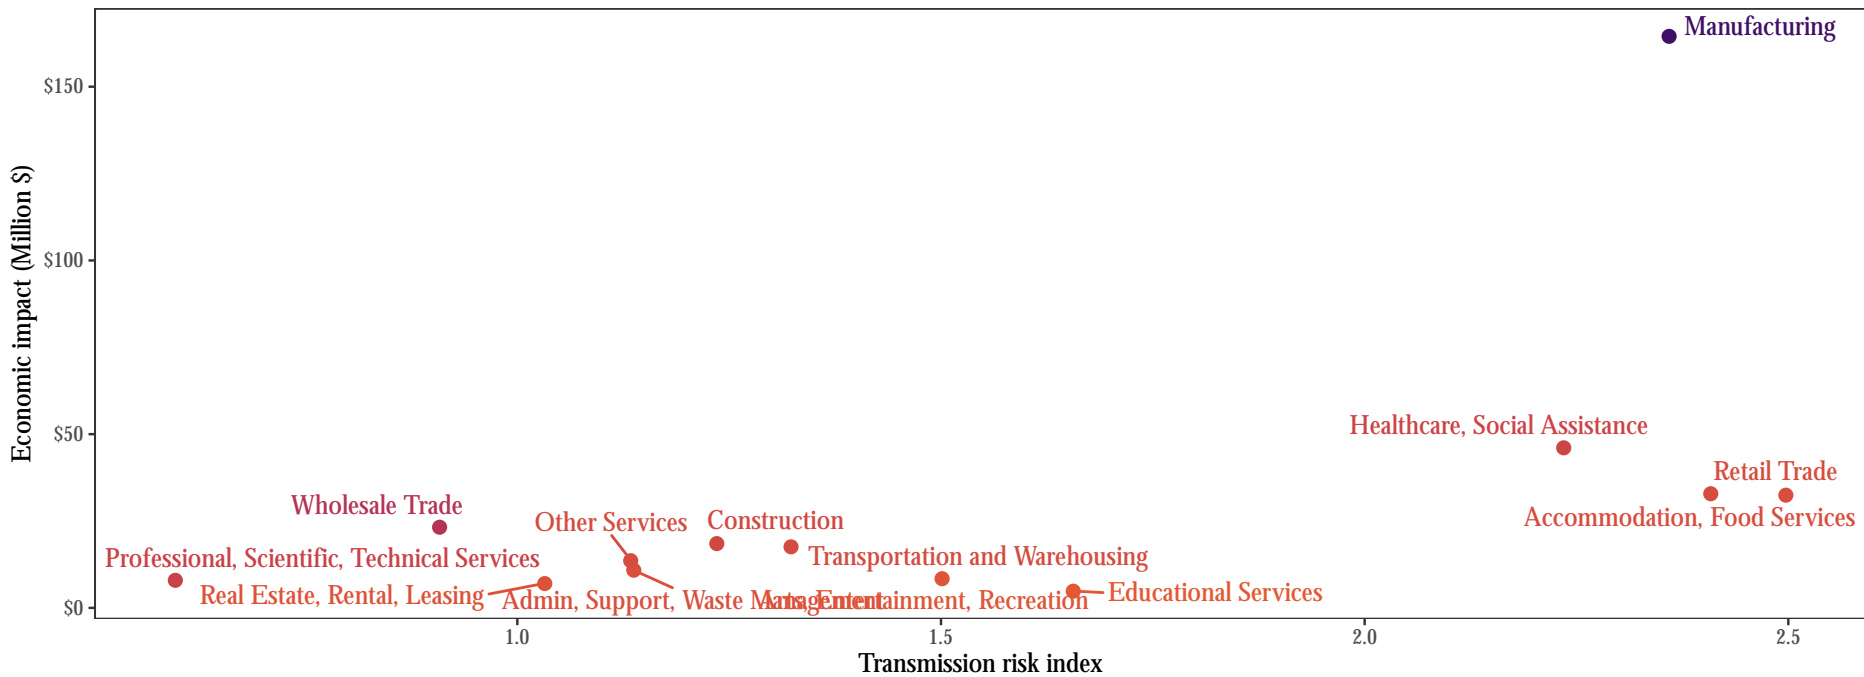

# Wisconsin

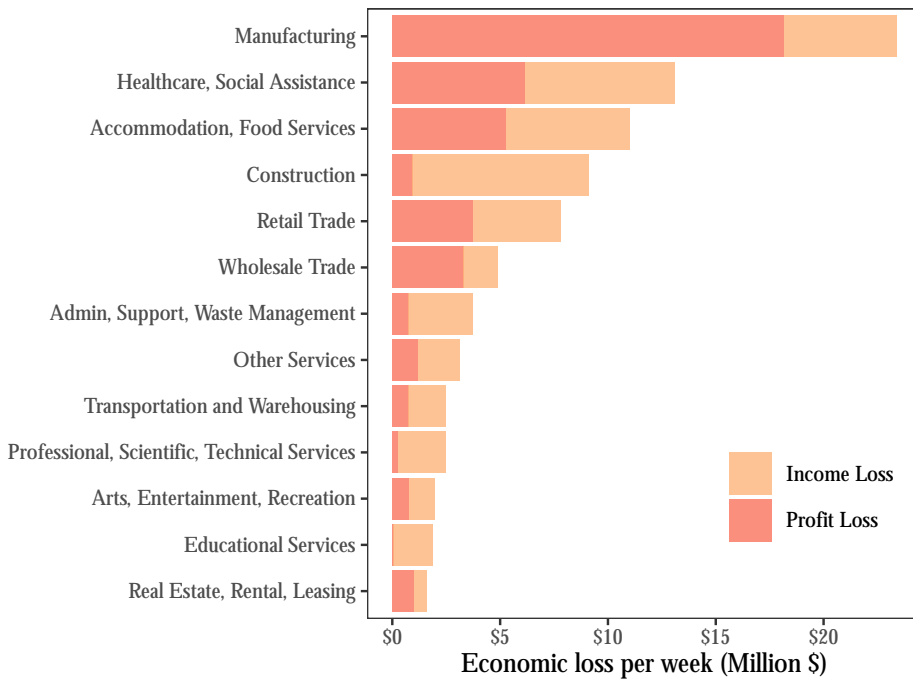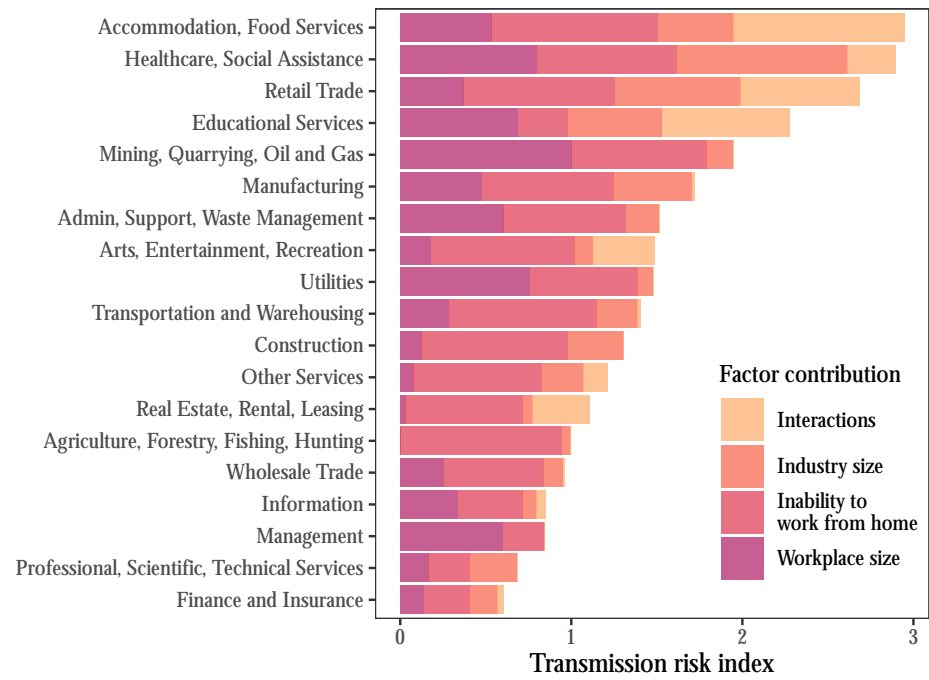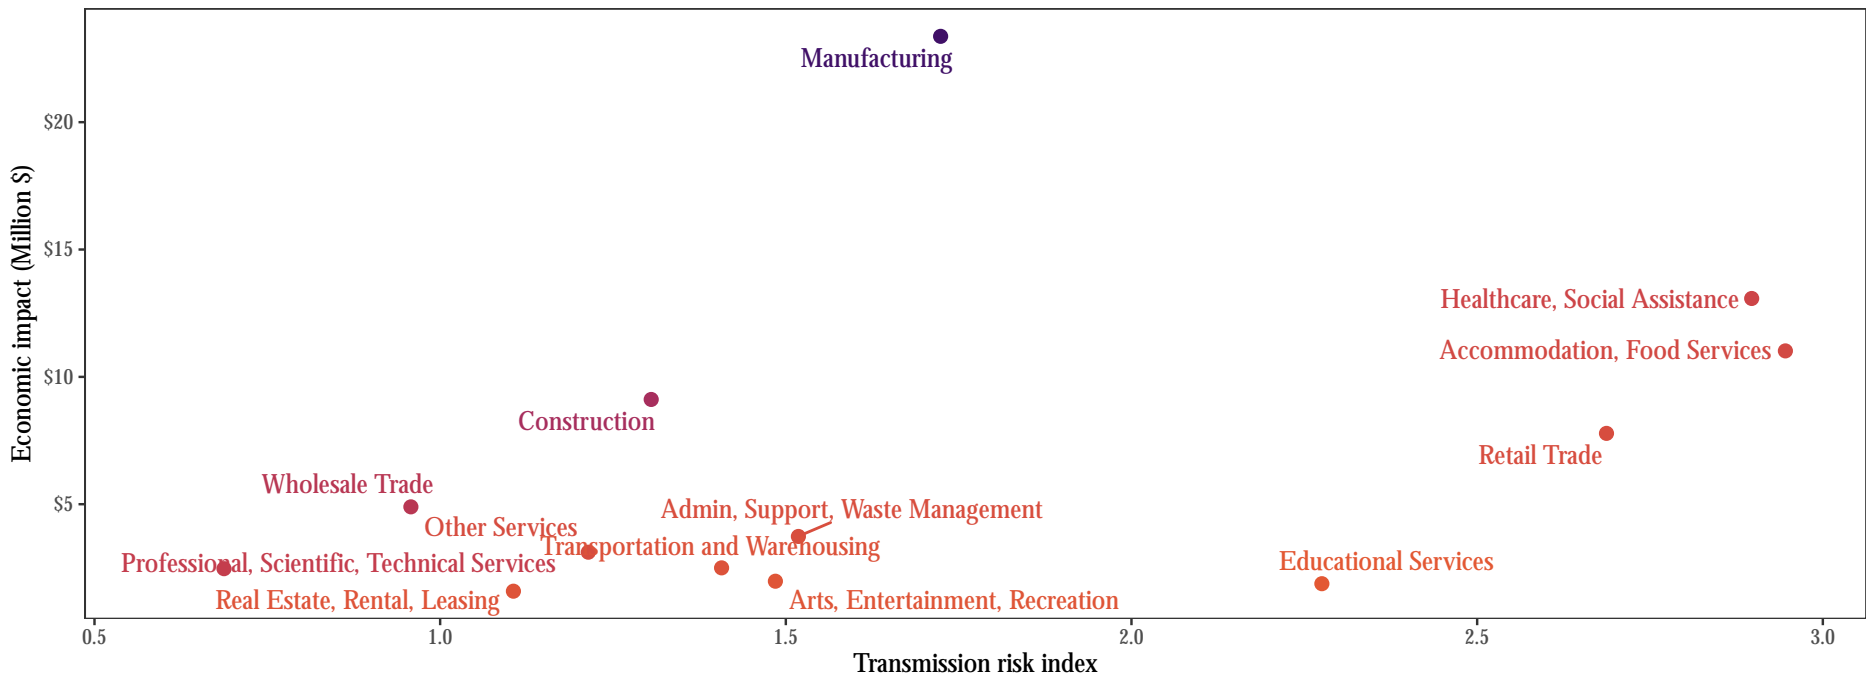

# Wyoming

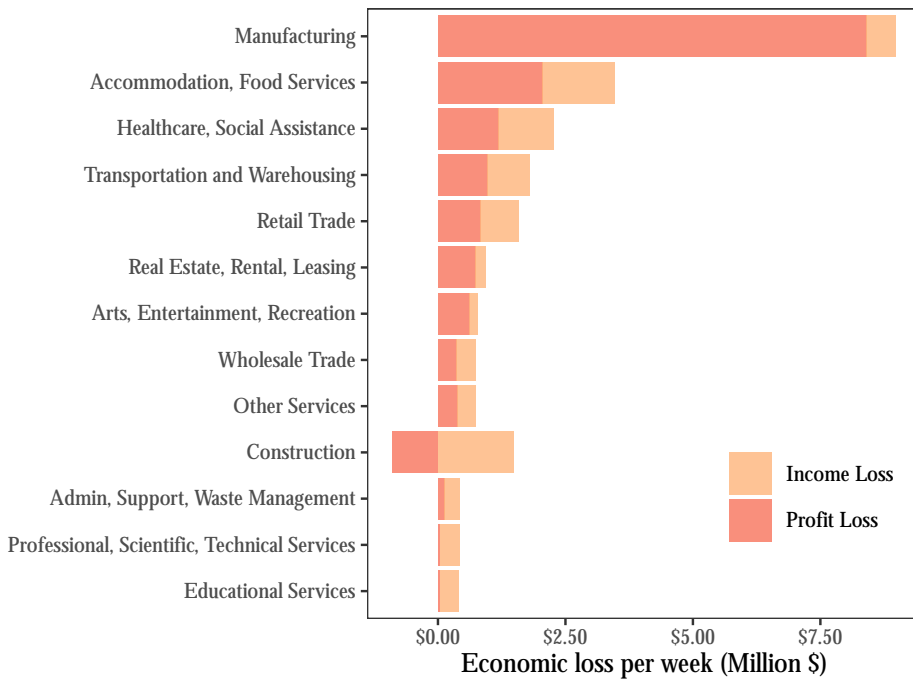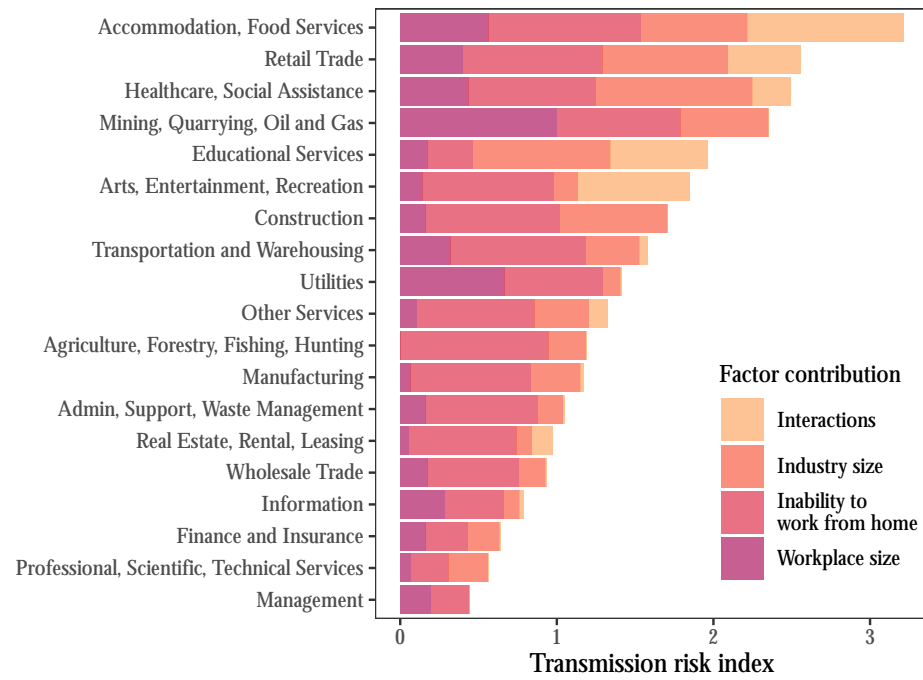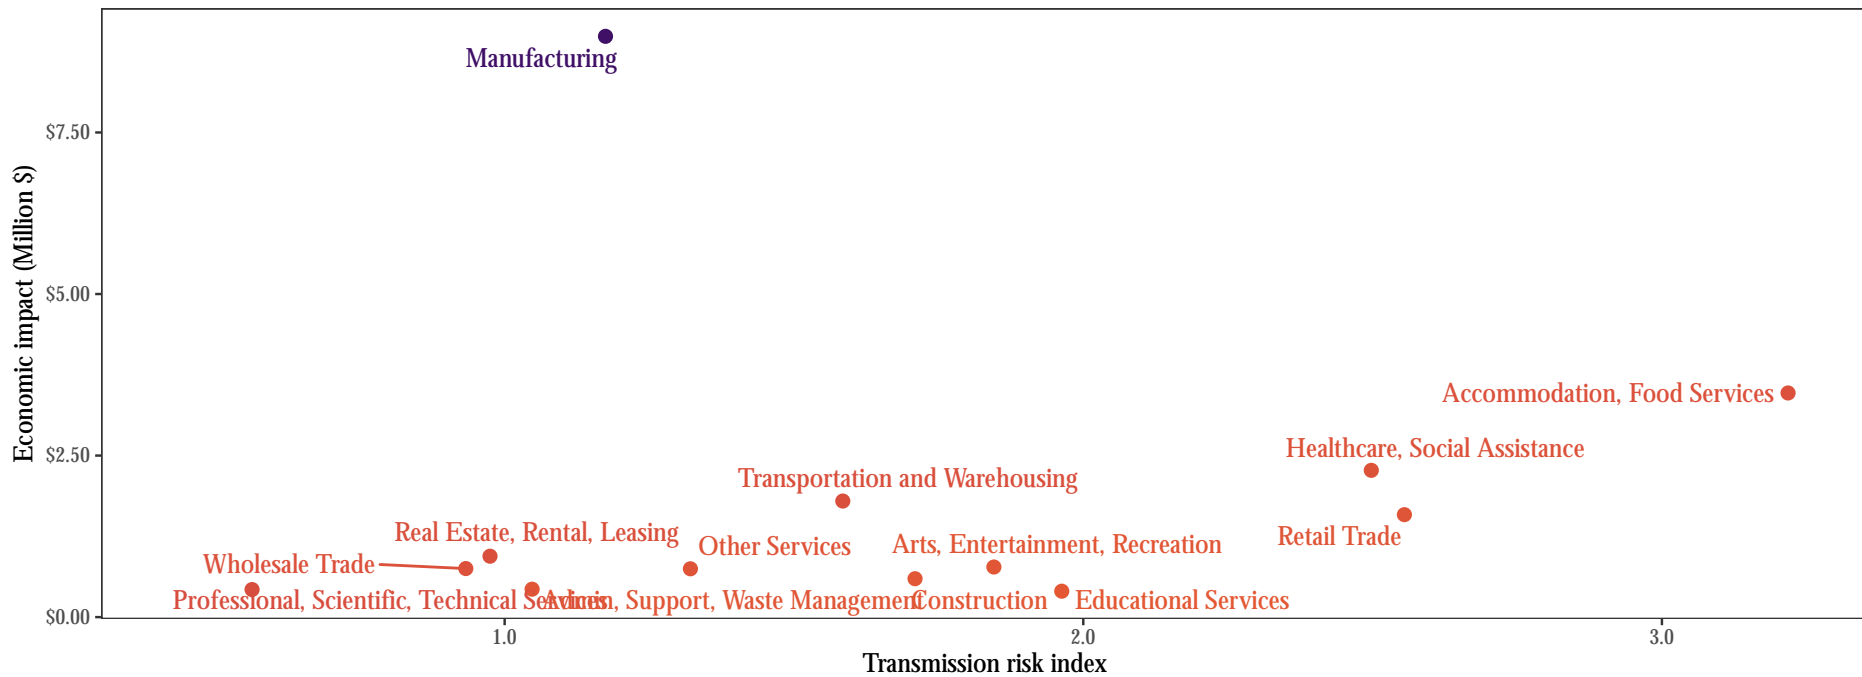

Supplement: Supplementary file [file 2020.06.11.20128918-2.pdf]
